# Supplementary material for: ZNF643/ZFP69B Exerts Oncogenic Properties and Associates with Cell Adhesion and Immune Processes
Source: MDPI journal article supplement (doi:10.3390/ijms242216380), 2023-11-15
Supplement: s1 [file s1]

| RNA-seq                                          |             |                              |                |                     |
|--------------------------------------------------|-------------|------------------------------|----------------|---------------------|
| Gene name                                        | Gene symbol | Expression in shZNF643 cells |                | Role in ferroptosis |
| H2073                                            |             |                              |                |                     |
| Transcription Factor AP-2 Alpha                  | TFAP2A      | upregulated                  |                | suppressor          |
| SKMES                                            |             |                              |                |                     |
| Activating Transcription Factor 3                | ATF3        | downregulated                |                | driver/unclassified |
| Dual Oxidase 1                                   | DUOX1       | downregulated                |                | driver              |
| Interleukin 1 Beta                               | IL1B        | downregulated                |                | driver              |
| MYB Proto-Oncogene, Transcription Factor         | MYB         | downregulated                |                | driver              |
| Cyclin Dependent Kinase Inhibitor 1A             | CDKN1       | downregulated                |                | suppressor          |
| Nuclear Receptor Subfamily 4 Group A Member 1    | NR4A1       | downregulated                |                | suppressor          |
| Nuclear Protein 1, Transcriptional Regulator     | NUPR1       | upregulated                  |                | suppressor          |
| Solute Carrier Family 2 Member 3                 | SLC2A3      | downregulated                |                | unclassified        |
| ChIP-seq                                         |             |                              |                |                     |
|                                                  | Gene name   | Peak overlap / Closest TSS   | Log2foldchange | Role in ferroptosis |
| ELOVL Fatty Acid Elongase 5                      | ELOVL5      | Overlap symbol               | 3.02           | driver              |
| F-Box And WD Repeat Domain Containing 7          | FBXW7       | Overlap symbol               | 1.78           | driver              |
| Peroxisome Proliferator Activated Receptor Gamma | PPARG       | Overlap symbol               | 3.52           | driver              |
| ZNFX1 Antisense RNA 1                            | ZFAS1       | Overlap symbol               | 3.61           | driver              |
| Dipeptidase 1                                    | DPEP1       | Closest TSS                  | 5.53           | driver              |

**Supplemental Table S1. Ferroptosis-related genes deregulated or bound by ZNF643.** The table represents DEGs identified in shZNF643 lung cell lines (H2073 and SKMES) and ZNF643-bound genes (in SKMES cell line) with known function in ferroptosis.
