# Supplementary material for: ZNF643/ZFP69B Exerts Oncogenic Properties and Associates with Cell Adhesion and Immune Processes
Source: Int J Mol Sci. 2023 Nov 15;24(22):16380. doi: 10.3390/ijms242216380 (PMC10671213; doi:10.3390/ijms242216380)
Supplement: Supplementary file 1 [file ijms-24-16380-s001.zip]

Archive with 5 entries (5 files):
- Supplemental Figures.pdf
- Supplemental File S1.xlsx
- Supplemental File S2.xlsx
- Supplemental File S3.xlsx
- Supplemental Table S1.pdf
