# Supplementary material for: ZNF643/ZFP69B Exerts Oncogenic Properties and Associates with Cell Adhesion and Immune Processes
Source: Int J Mol Sci. 2023 Nov 15;24(22):16380. doi: 10.3390/ijms242216380 (PMC10671213; doi:10.3390/ijms242216380)
Supplement: Supplementary file 1 [file ijms-24-16380-s001.zip › Supplemental File S1.xlsx]

## Sheet: Description
Supplemental File 1. Mutations identified in ZNF643 gene in TCGA datasets. The rows are ordered based on the highest number of samples with ZNF643 mutation, to the lowest number (from 5 to 1). The annotation for all variants have "unknown" status. Allele Freq (T) denotes Variant Allele Frequency in tumor samples. The table was downloaded from https://www.cbioportal.org/results/mutations?case_set_…

## Sheet: Mutations affecting ZNF643 gene
Study of Origin	Sample ID	Cancer Type Detailed	Number of samples with mutations	Protein Change	Annotation	Functional Impact	Mutation Type	Variant Type	Copy #	COSMIC	MS	VS	Center	Chromosome	Start Pos	End Pos	Ref	Var	HGVSg	HGVSc	Allele Freq (T)	Allele Freq (N)	Variant Reads	Ref Reads	Variant Reads (Normal)	Ref Reads (Normal)	# Mut in Sample	Exon	gnomAD	ClinVar	dbSNP	SIGNAL
Uterine Corpus Endometrial Carcinoma (TCGA, PanCancer Atlas)	TCGA-AP-A056-01	Uterine Endometrioid Carcinoma	5	R393I	OncoKB: NA;CIViC: NA;MyCancerGenome: not present;CancerHotspot: no;3DHotspot: no	MutationAssessor: impact: medium, score: 2.06;SIFT: impact: deleterious, score: 0;Polyphen-2: impact: probably_damaging, score: 0.998	Missense_Mutation	SNP	Diploid		.	.	.	1	40929140	40929140	G	T	1:g.40929140G>T	ENST00000361584.3:c.1178G>T	0.27		62	171		202	8231	5			rs1034816639
Uterine Corpus Endometrial Carcinoma (TCGA, PanCancer Atlas)	TCGA-BS-A0UV-01	Uterine Endometrioid Carcinoma	5	R393I	OncoKB: NA;CIViC: NA;MyCancerGenome: not present;CancerHotspot: no;3DHotspot: no	MutationAssessor: impact: medium, score: 2.06;SIFT: impact: deleterious, score: 0;Polyphen-2: impact: probably_damaging, score: 0.998	Missense_Mutation	SNP	Diploid		.	.	.	1	40929140	40929140	G	T	1:g.40929140G>T	ENST00000361584.3:c.1178G>T	0.42	0.0056	39	53	1	179	8969	5			rs1034816639
Uterine Corpus Endometrial Carcinoma (TCGA, PanCancer Atlas)	TCGA-D1-A103-01	Uterine Endometrioid Carcinoma	5	R393I	OncoKB: NA;CIViC: NA;MyCancerGenome: not present;CancerHotspot: no;3DHotspot: no	MutationAssessor: impact: medium, score: 2.06;SIFT: impact: deleterious, score: 0;Polyphen-2: impact: probably_damaging, score: 0.998	Missense_Mutation	SNP	Diploid		.	.	.	1	40929140	40929140	G	T	1:g.40929140G>T	ENST00000361584.3:c.1178G>T	0.34		16	31		114	6851	5			rs1034816639
Colorectal Adenocarcinoma (TCGA, PanCancer Atlas)	TCGA-AA-A00N-01	Mucinous Adenocarcinoma of the Colon and Rectum	5	R393I	OncoKB: NA;CIViC: NA;MyCancerGenome: not present;CancerHotspot: no;3DHotspot: no	MutationAssessor: impact: medium, score: 2.06;SIFT: impact: deleterious, score: 0;Polyphen-2: impact: probably_damaging, score: 0.998	Missense_Mutation	SNP	Diploid		.	.	.	1	40929140	40929140	G	T	1:g.40929140G>T	ENST00000361584.3:c.1178G>T	0.20		17	67		134	4875	5			rs1034816639
Skin Cutaneous Melanoma (TCGA, PanCancer Atlas)	TCGA-FS-A1ZD-06	Cutaneous Melanoma	5	R393K	OncoKB: NA;CIViC: NA;MyCancerGenome: not present;CancerHotspot: no;3DHotspot: no	MutationAssessor: impact: neutral, score: 0.295;SIFT: impact: tolerated, score: 0.3;Polyphen-2: impact: probably_damaging, score: 0.988	Missense_Mutation	SNP	Diploid		.	.	.	1	40929140	40929140	G	A	1:g.40929140G>A	ENST00000361584.3:c.1178G>A	0.67		32	16		54	461	5
Uterine Corpus Endometrial Carcinoma (TCGA, PanCancer Atlas)	TCGA-AX-A05Z-01	Uterine Endometrioid Carcinoma	4	S61L	OncoKB: NA;CIViC: NA;MyCancerGenome: not present;CancerHotspot: no;3DHotspot: no	MutationAssessor: impact: low, score: 0.935;SIFT: impact: tolerated, score: 0.06;Polyphen-2: impact: benign, score: 0.011	Missense_Mutation	SNP	Diploid		.	.	.	1	40928144	40928144	C	T	1:g.40928144C>T	ENST00000361584.3:c.182C>T	0.31		127	277		398	7370	5	0.000020112		rs759049040
Uterine Corpus Endometrial Carcinoma (TCGA, PanCancer Atlas)	TCGA-EO-A22U-01	Uterine Endometrioid Carcinoma	4	S61L	OncoKB: NA;CIViC: NA;MyCancerGenome: not present;CancerHotspot: no;3DHotspot: no	MutationAssessor: impact: low, score: 0.935;SIFT: impact: tolerated, score: 0.06;Polyphen-2: impact: benign, score: 0.011	Missense_Mutation	SNP	Diploid		.	.	.	1	40928144	40928144	C	T	1:g.40928144C>T	ENST00000361584.3:c.182C>T	0.43		6	8		10	13822	5	0.000020112		rs759049040
Skin Cutaneous Melanoma (TCGA, PanCancer Atlas)	TCGA-ER-A19G-06	Cutaneous Melanoma	4	S61L	OncoKB: NA;CIViC: NA;MyCancerGenome: not present;CancerHotspot: no;3DHotspot: no	MutationAssessor: impact: low, score: 0.935;SIFT: impact: tolerated, score: 0.06;Polyphen-2: impact: benign, score: 0.011	Missense_Mutation	SNP	Gain		.	.	.	1	40928144	40928144	C	T	1:g.40928144C>T	ENST00000361584.3:c.182C>T	0.50		117	115		110	951	5	0.000020112		rs759049040
Colorectal Adenocarcinoma (TCGA, PanCancer Atlas)	TCGA-AA-A00N-01	Mucinous Adenocarcinoma of the Colon and Rectum	4	S61L	OncoKB: NA;CIViC: NA;MyCancerGenome: not present;CancerHotspot: no;3DHotspot: no	MutationAssessor: impact: low, score: 0.935;SIFT: impact: tolerated, score: 0.06;Polyphen-2: impact: benign, score: 0.011	Missense_Mutation	SNP	Diploid		.	.	.	1	40928144	40928144	C	T	1:g.40928144C>T	ENST00000361584.3:c.182C>T	0.24	0.0026	53	164	1	390	4875	5	0.000020112		rs759049040
Uterine Corpus Endometrial Carcinoma (TCGA, PanCancer Atlas)	TCGA-B5-A0JY-01	Uterine Endometrioid Carcinoma	3	R225I	OncoKB: NA;CIViC: NA;MyCancerGenome: not present;CancerHotspot: no;3DHotspot: no	MutationAssessor: impact: low, score: 1.6;SIFT: impact: tolerated, score: 0.06;Polyphen-2: impact: probably_damaging, score: 0.999	Missense_Mutation	SNP	Diploid		.	.	.	1	40928636	40928636	G	T	1:g.40928636G>T	ENST00000361584.3:c.674G>T	0.29		46	115		101	9686	5	0.00008138193604087496	Uncertain_significance	rs137945908
Colorectal Adenocarcinoma (TCGA, PanCancer Atlas)	TCGA-AZ-4315-01	Colon Adenocarcinoma	3	R225I	OncoKB: NA;CIViC: NA;MyCancerGenome: not present;CancerHotspot: no;3DHotspot: no	MutationAssessor: impact: low, score: 1.6;SIFT: impact: tolerated, score: 0.06;Polyphen-2: impact: probably_damaging, score: 0.999	Missense_Mutation	SNP	Diploid		.	.	.	1	40928636	40928636	G	T	1:g.40928636G>T	ENST00000361584.3:c.674G>T	0.28		21	55		130	6313	5	0.00008138193604087496	Uncertain_significance	rs137945908
Sarcoma (TCGA, PanCancer Atlas)	TCGA-QC-A7B5-01	Undifferentiated Pleomorphic Sarcoma/Malignant Fibrous Histiocytoma/High-Grade Spindle Cell Sarcoma	3	R225K	OncoKB: NA;CIViC: NA;MyCancerGenome: not present;CancerHotspot: no;3DHotspot: no	MutationAssessor: impact: neutral, score: 0.575;SIFT: impact: deleterious, score: 0.01;Polyphen-2: impact: probably_damaging, score: 0.993	Missense_Mutation	SNP	Gain		.	.	.	1	40928636	40928636	G	A	1:g.40928636G>A	ENST00000361584.3:c.674G>A	0.29		19	46		38	1751	5
Brain Lower Grade Glioma (TCGA, PanCancer Atlas)	TCGA-FG-A60L-01	Astrocytoma	3	S414L	OncoKB: NA;CIViC: NA;MyCancerGenome: not present;CancerHotspot: no;3DHotspot: no	MutationAssessor: impact: low, score: 1.93;SIFT: impact: deleterious, score: 0;Polyphen-2: impact: possibly_damaging, score: 0.844	Missense_Mutation	SNP	Diploid		.	.	.	1	40929203	40929203	C	T	1:g.40929203C>T	ENST00000361584.3:c.1241C>T	0.20		18	71		105	25	5
Bladder Urothelial Carcinoma (TCGA, PanCancer Atlas)	TCGA-DK-A1AC-01	Bladder Urothelial Carcinoma	3	S414L	OncoKB: NA;CIViC: NA;MyCancerGenome: not present;CancerHotspot: no;3DHotspot: no	MutationAssessor: impact: low, score: 1.93;SIFT: impact: deleterious, score: 0;Polyphen-2: impact: possibly_damaging, score: 0.844	Missense_Mutation	SNP	Diploid		.	.	.	1	40929203	40929203	C	T	1:g.40929203C>T	ENST00000361584.3:c.1241C>T	0.21		21	77		88	1293	5
Bladder Urothelial Carcinoma (TCGA, PanCancer Atlas)	TCGA-ZF-A9RC-01	Bladder Urothelial Carcinoma	3	S414L	OncoKB: NA;CIViC: NA;MyCancerGenome: not present;CancerHotspot: no;3DHotspot: no	MutationAssessor: impact: low, score: 1.93;SIFT: impact: deleterious, score: 0;Polyphen-2: impact: possibly_damaging, score: 0.844	Missense_Mutation	SNP	Amp		.	.	.	1	40929203	40929203	C	T	1:g.40929203C>T	ENST00000361584.3:c.1241C>T	0.61		97	61		79	846	5
Bladder Urothelial Carcinoma (TCGA, PanCancer Atlas)	TCGA-FD-A6TA-01	Bladder Urothelial Carcinoma	2	Q117E	OncoKB: NA;CIViC: NA;MyCancerGenome: not present;CancerHotspot: no;3DHotspot: no	MutationAssessor: impact: neutral, score: 0.68;SIFT: impact: tolerated, score: 0.98;Polyphen-2: impact: benign, score: 0.012	Missense_Mutation	SNP	Diploid		.	.	.	1	40928311	40928311	C	G	1:g.40928311C>G	ENST00000361584.3:c.349C>G	0.23		36	119		167	251	5
Bladder Urothelial Carcinoma (TCGA, PanCancer Atlas)	TCGA-UY-A9PD-01	Bladder Urothelial Carcinoma	2	Q117E	OncoKB: NA;CIViC: NA;MyCancerGenome: not present;CancerHotspot: no;3DHotspot: no	MutationAssessor: impact: neutral, score: 0.68;SIFT: impact: tolerated, score: 0.98;Polyphen-2: impact: benign, score: 0.012	Missense_Mutation	SNP	Gain		.	.	.	1	40928311	40928311	C	G	1:g.40928311C>G	ENST00000361584.3:c.349C>G	0.37		65	109		103	264	5
Uterine Corpus Endometrial Carcinoma (TCGA, PanCancer Atlas)	TCGA-BS-A0UF-01	Uterine Endometrioid Carcinoma	2	R129I	OncoKB: NA;CIViC: NA;MyCancerGenome: not present;CancerHotspot: no;3DHotspot: no	MutationAssessor: impact: low, score: 1.41;SIFT: impact: deleterious, score: 0.04;Polyphen-2: impact: benign, score: 0.072	Missense_Mutation	SNP	Diploid		.	.	.	1	40928348	40928348	G	T	1:g.40928348G>T	ENST00000361584.3:c.386G>T	0.34		21	40		68	8372	5	0.0000399674		rs562615056
Colorectal Adenocarcinoma (TCGA, PanCancer Atlas)	TCGA-CA-6717-01	Mucinous Adenocarcinoma of the Colon and Rectum	2	R129I	OncoKB: NA;CIViC: NA;MyCancerGenome: not present;CancerHotspot: no;3DHotspot: no	MutationAssessor: impact: low, score: 1.41;SIFT: impact: deleterious, score: 0.04;Polyphen-2: impact: benign, score: 0.072	Missense_Mutation	SNP	Diploid		.	.	.	1	40928348	40928348	G	T	1:g.40928348G>T	ENST00000361584.3:c.386G>T	0.08		11	131		103	9586	5	0.0000399674		rs562615056
Uterine Corpus Endometrial Carcinoma (TCGA, PanCancer Atlas)	TCGA-A5-A0G2-01	Uterine Serous Carcinoma/Uterine Papillary Serous Carcinoma	2	R149C	OncoKB: NA;CIViC: NA;MyCancerGenome: not present;CancerHotspot: no;3DHotspot: no	MutationAssessor: impact: neutral, score: 0.035;SIFT: impact: tolerated, score: 0.21;Polyphen-2: impact: benign, score: 0.001	Missense_Mutation	SNP	ShallowDel		.	.	.	1	40928407	40928407	C	T	1:g.40928407C>T	ENST00000361584.3:c.445C>T	0.28		87	227		383	25698	5	0.0000318512		rs955594442
Uterine Corpus Endometrial Carcinoma (TCGA, PanCancer Atlas)	TCGA-AJ-A5DW-01	Uterine Endometrioid Carcinoma	2	R149C	OncoKB: NA;CIViC: NA;MyCancerGenome: not present;CancerHotspot: no;3DHotspot: no	MutationAssessor: impact: neutral, score: 0.035;SIFT: impact: tolerated, score: 0.21;Polyphen-2: impact: benign, score: 0.001	Missense_Mutation	SNP	Diploid		.	.	.	1	40928407	40928407	C	T	1:g.40928407C>T	ENST00000361584.3:c.445C>T	0.63		5	3		18	3184	5	0.0000318512		rs955594442
Bladder Urothelial Carcinoma (TCGA, PanCancer Atlas)	TCGA-FD-A6TA-01	Bladder Urothelial Carcinoma	2	Q250E	OncoKB: NA;CIViC: NA;MyCancerGenome: not present;CancerHotspot: no;3DHotspot: no	MutationAssessor: impact: neutral, score: 0.385;SIFT: impact: tolerated, score: 0.09;Polyphen-2: impact: possibly_damaging, score: 0.705	Missense_Mutation	SNP	Diploid		.	.	.	1	40928710	40928710	C	G	1:g.40928710C>G	ENST00000361584.3:c.748C>G	0.32		13	28		41	251	5			rs751494351
Bladder Urothelial Carcinoma (TCGA, PanCancer Atlas)	TCGA-KQ-A41N-01	Bladder Urothelial Carcinoma	2	Q250K	OncoKB: NA;CIViC: NA;MyCancerGenome: not present;CancerHotspot: no;3DHotspot: no	MutationAssessor: impact: neutral, score: -0.355;SIFT: impact: tolerated, score: 0.06;Polyphen-2: impact: probably_damaging, score: 0.976	Missense_Mutation	SNP	Diploid		.	.	.	1	40928710	40928710	C	A	1:g.40928710C>A	ENST00000361584.3:c.748C>A	0.12		5	38		37	2525	5
Colorectal Adenocarcinoma (TCGA, PanCancer Atlas)	TCGA-AG-A002-01	Rectal Adenocarcinoma	2	R365I	OncoKB: NA;CIViC: NA;MyCancerGenome: not present;CancerHotspot: no;3DHotspot: no	MutationAssessor: impact: low, score: 1.715;SIFT: impact: deleterious, score: 0.03;Polyphen-2: impact: benign, score: 0.003	Missense_Mutation	SNP	Diploid		.	.	.	1	40929056	40929056	G	T	1:g.40929056G>T	ENST00000361584.3:c.1094G>T	0.37		77	132		163	11414	5
Uterine Corpus Endometrial Carcinoma (TCGA, PanCancer Atlas)	TCGA-AX-A0J0-01	Uterine Endometrioid Carcinoma	2	R365K	OncoKB: NA;CIViC: NA;MyCancerGenome: not present;CancerHotspot: no;3DHotspot: no	MutationAssessor: impact: low, score: 0.815;SIFT: impact: tolerated, score: 0.31;Polyphen-2: impact: benign, score: 0.069	Missense_Mutation	SNP	Diploid		.	.	.	1	40929056	40929056	G	A	1:g.40929056G>A	ENST00000361584.3:c.1094G>A	0.45		65	78		237	7795	5	0.00000397871		rs1214062191
Head and Neck Squamous Cell Carcinoma (TCGA, PanCancer Atlas)	TCGA-D6-6516-01	Head and Neck Squamous Cell Carcinoma	2	I394N	OncoKB: NA;CIViC: NA;MyCancerGenome: not present;CancerHotspot: no;3DHotspot: no	MutationAssessor: impact: low, score: 1.395;SIFT: impact: deleterious, score: 0.05;Polyphen-2: impact: benign, score: 0.018	Missense_Mutation	SNP	ShallowDel		.	.	.	1	40929143	40929143	T	A	1:g.40929143T>A	ENST00000361584.3:c.1181T>A	0.24		12	37		59	1524	5
Skin Cutaneous Melanoma (TCGA, PanCancer Atlas)	TCGA-FS-A1ZW-06	Cutaneous Melanoma	2	I394V	OncoKB: NA;CIViC: NA;MyCancerGenome: not present;CancerHotspot: no;3DHotspot: no	MutationAssessor: impact: neutral, score: 0.625;SIFT: impact: tolerated, score: 0.84;Polyphen-2: impact: benign, score: 0.03	Missense_Mutation	SNP	ShallowDel		.	.	.	1	40929142	40929142	A	G	1:g.40929142A>G	ENST00000361584.3:c.1180A>G	0.26		12	34		57	589	5
Breast Invasive Carcinoma (TCGA, PanCancer Atlas)	TCGA-C8-A26Y-01	Breast Invasive Ductal Carcinoma	2	K408E	OncoKB: NA;CIViC: NA;MyCancerGenome: not present;CancerHotspot: no;3DHotspot: no	MutationAssessor: impact: low, score: 1.57;SIFT: impact: deleterious, score: 0;Polyphen-2: impact: probably_damaging, score: 0.997	Missense_Mutation	SNP	Diploid		.	.	.	1	40929184	40929184	A	G	1:g.40929184A>G	ENST00000361584.3:c.1222A>G	0.27		10	27		16	633	5
Uterine Corpus Endometrial Carcinoma (TCGA, PanCancer Atlas)	TCGA-E6-A1LX-01	Uterine Endometrioid Carcinoma	2	K408Q	OncoKB: NA;CIViC: NA;MyCancerGenome: not present;CancerHotspot: no;3DHotspot: no	MutationAssessor: impact: medium, score: 2.135;SIFT: impact: deleterious, score: 0;Polyphen-2: impact: probably_damaging, score: 0.996	Missense_Mutation	SNP	Diploid		.	.	.	1	40929184	40929184	A	C	1:g.40929184A>C	ENST00000361584.3:c.1222A>C	0.20		10	40		37	12694	5
Ovarian Serous Cystadenocarcinoma (TCGA, PanCancer Atlas)	TCGA-24-2030-01	Serous Ovarian Cancer	2	S429G	OncoKB: NA;CIViC: NA;MyCancerGenome: not present;CancerHotspot: no;3DHotspot: no	MutationAssessor: impact: neutral, score: 0.715;SIFT: impact: tolerated_low_confidence, score: 0.1;Polyphen-2: impact: benign, score: 0.071	Missense_Mutation	SNP	Gain		.	.	.	1	40929247	40929247	A	G	1:g.40929247A>G	ENST00000361584.3:c.1285A>G	0.24		22	68		221	68	5			rs1645314177
Uterine Corpus Endometrial Carcinoma (TCGA, PanCancer Atlas)	TCGA-EO-A22R-01	Uterine Endometrioid Carcinoma	2	S429I	OncoKB: NA;CIViC: NA;MyCancerGenome: not present;CancerHotspot: no;3DHotspot: no	MutationAssessor: impact: low, score: 0.805;SIFT: impact: deleterious_low_confidence, score: 0.05;Polyphen-2: impact: benign, score: 0.107	Missense_Mutation	SNP	Diploid		.	.	.	1	40929248	40929248	G	T	1:g.40929248G>T	ENST00000361584.3:c.1286G>T	0.29		9	22		28	12771	5
Uterine Corpus Endometrial Carcinoma (TCGA, PanCancer Atlas)	TCGA-B5-A3FA-01	Uterine Endometrioid Carcinoma	1	L2P	OncoKB: NA;CIViC: NA;MyCancerGenome: not present;CancerHotspot: no;3DHotspot: no	MutationAssessor: impact: high, score: 4.58;SIFT: impact: deleterious, score: 0;Polyphen-2: impact: probably_damaging, score: 0.998	Missense_Mutation	SNP	Diploid		.	.	.	1	40922714	40922714	T	C	1:g.40922714T>C	ENST00000361584.3:c.5T>C	0.30		17	40		43	9645	3
Bladder Urothelial Carcinoma (TCGA, PanCancer Atlas)	TCGA-DK-A2I2-01	Bladder Urothelial Carcinoma	1	NUFIP2-ZFP69B Fusion	OncoKB: Unknown, level NA, resistance NA;CIViC: NA;MyCancerGenome: not present;CancerHotspot: no;3DHotspot: no	MutationAssessor: NA;SIFT: NA;Polyphen-2: NA	fusion	NA	Gain		SOMATIC		N/A	17	29293783												406
Stomach Adenocarcinoma (TCGA, PanCancer Atlas)	TCGA-BR-8680-01	Tubular Stomach Adenocarcinoma	1	E3D	OncoKB: NA;CIViC: NA;MyCancerGenome: not present;CancerHotspot: no;3DHotspot: no	MutationAssessor: impact: high, score: 3.505;SIFT: impact: deleterious, score: 0.01;Polyphen-2: impact: possibly_damaging, score: 0.565	Missense_Mutation	SNP	Diploid		.	.	.	1	40922718	40922718	G	T	1:g.40922718G>T	ENST00000361584.3:c.9G>T	0.15		8	44		72	5406	3
Uterine Corpus Endometrial Carcinoma (TCGA, PanCancer Atlas)	TCGA-A5-A0G2-01	Uterine Serous Carcinoma/Uterine Papillary Serous Carcinoma	1	P18H	OncoKB: NA;CIViC: NA;MyCancerGenome: not present;CancerHotspot: no;3DHotspot: no	MutationAssessor: impact: high, score: 3.525;SIFT: impact: deleterious, score: 0;Polyphen-2: impact: probably_damaging, score: 0.998	Missense_Mutation	SNP	ShallowDel		.	.	.	1	40923034	40923034	C	A	1:g.40923034C>A	ENST00000361584.3:c.53C>A	0.24		34	108		208	25698	4
Lung Adenocarcinoma (TCGA, PanCancer Atlas)	TCGA-69-7973-01	Lung Adenocarcinoma	1	G19R	OncoKB: NA;CIViC: NA;MyCancerGenome: not present;CancerHotspot: no;3DHotspot: no	MutationAssessor: impact: neutral, score: 0.55;SIFT: impact: tolerated, score: 0.3;Polyphen-2: impact: benign, score: 0.005	Missense_Mutation	SNP	ShallowDel		.	.	.	1	40923036	40923036	G	C	1:g.40923036G>C	ENST00000361584.3:c.55G>C	0.35		20	37		84	240	4
Bladder Urothelial Carcinoma (TCGA, PanCancer Atlas)	TCGA-DK-A6AW-01	Bladder Urothelial Carcinoma	1	G27*	OncoKB: NA;CIViC: NA;MyCancerGenome: not present;CancerHotspot: no;3DHotspot: no	MutationAssessor: NA;SIFT: NA;Polyphen-2: NA	Nonsense_Mutation	SNP	Diploid		.	.	.	1	40923060	40923060	G	T	1:g.40923060G>T	ENST00000361584.3:c.79G>T	0.40		22	33		77	3552	4
Ovarian Serous Cystadenocarcinoma (TCGA, PanCancer Atlas)	TCGA-59-2348-01	Serous Ovarian Cancer	1	L32V	OncoKB: NA;CIViC: NA;MyCancerGenome: not present;CancerHotspot: no;3DHotspot: no	MutationAssessor: impact: neutral, score: -0.105;SIFT: impact: tolerated, score: 0.21;Polyphen-2: impact: benign, score: 0.021	Missense_Mutation	SNP	Gain		.	.	.	1	40923075	40923075	C	G	1:g.40923075C>G	ENST00000361584.3:c.94C>G	0.21		54	200		326	97	4
Uterine Corpus Endometrial Carcinoma (TCGA, PanCancer Atlas)	TCGA-E6-A1LX-01	Uterine Endometrioid Carcinoma	1	R35I	OncoKB: NA;CIViC: NA;MyCancerGenome: not present;CancerHotspot: no;3DHotspot: no	MutationAssessor: impact: medium, score: 2.1;SIFT: impact: tolerated, score: 0.09;Polyphen-2: impact: benign, score: 0.271	Missense_Mutation	SNP	Diploid		.	.	.	1	40923085	40923085	G	T	1:g.40923085G>T	ENST00000361584.3:c.104G>T	0.42		14	19		34	12694	4
Skin Cutaneous Melanoma (TCGA, PanCancer Atlas)	TCGA-D3-A5GL-06	Cutaneous Melanoma	1	E53K	OncoKB: NA;CIViC: NA;MyCancerGenome: not present;CancerHotspot: no;3DHotspot: no	MutationAssessor: impact: low, score: 1.235;SIFT: impact: tolerated, score: 0.27;Polyphen-2: impact: benign, score: 0	Missense_Mutation	SNP	Diploid		.	.	.	1	40928119	40928119	G	A	1:g.40928119G>A	ENST00000361584.3:c.157G>A	0.32		47	99		102	368	5
Bladder Urothelial Carcinoma (TCGA, PanCancer Atlas)	TCGA-GD-A3OP-01	Bladder Urothelial Carcinoma	1	D59H	OncoKB: NA;CIViC: NA;MyCancerGenome: not present;CancerHotspot: no;3DHotspot: no	MutationAssessor: impact: medium, score: 2.075;SIFT: impact: tolerated, score: 0.05;Polyphen-2: impact: benign, score: 0.436	Missense_Mutation	SNP	Diploid		.	.	.	1	40928137	40928137	G	C	1:g.40928137G>C	ENST00000361584.3:c.175G>C	0.08		15	176		117	334	5
Stomach Adenocarcinoma (TCGA, PanCancer Atlas)	TCGA-BR-8078-01	Stomach Adenocarcinoma	1	M70T	OncoKB: NA;CIViC: NA;MyCancerGenome: not present;CancerHotspot: no;3DHotspot: no	MutationAssessor: impact: low, score: 1.605;SIFT: impact: tolerated, score: 0.2;Polyphen-2: impact: benign, score: 0.033	Missense_Mutation	SNP	Diploid		.	.	.	1	40928171	40928171	T	C	1:g.40928171T>C	ENST00000361584.3:c.209T>C	0.30		35	81		302	1443	5
Skin Cutaneous Melanoma (TCGA, PanCancer Atlas)	TCGA-W3-AA1V-06	Cutaneous Melanoma	1	F74Y	OncoKB: NA;CIViC: NA;MyCancerGenome: not present;CancerHotspot: no;3DHotspot: no	MutationAssessor: impact: low, score: 1.635;SIFT: impact: tolerated, score: 0.45;Polyphen-2: impact: benign, score: 0.136	Missense_Mutation	SNP	Diploid		.	.	.	1	40928183	40928183	T	A	1:g.40928183T>A	ENST00000361584.3:c.221T>A	0.34		37	72		118	4559	5
Lung Adenocarcinoma (TCGA, PanCancer Atlas)	TCGA-L9-A7SV-01	Lung Adenocarcinoma	1	S79C	OncoKB: NA;CIViC: NA;MyCancerGenome: not present;CancerHotspot: no;3DHotspot: no	MutationAssessor: impact: low, score: 0.835;SIFT: impact: tolerated, score: 0.18;Polyphen-2: impact: benign, score: 0.01	Missense_Mutation	SNP	Gain		.	.	.	1	40928197	40928197	A	T	1:g.40928197A>T	ENST00000361584.3:c.235A>T	0.47		70	79		97	1390	5
Skin Cutaneous Melanoma (TCGA, PanCancer Atlas)	TCGA-EE-A2GN-06	Cutaneous Melanoma	1	E94K	OncoKB: NA;CIViC: NA;MyCancerGenome: not present;CancerHotspot: no;3DHotspot: no	MutationAssessor: impact: medium, score: 2.505;SIFT: impact: tolerated, score: 0.05;Polyphen-2: impact: benign, score: 0.005	Missense_Mutation	SNP	Diploid		.	.	.	1	40928242	40928242	G	A	1:g.40928242G>A	ENST00000361584.3:c.280G>A	0.50		52	52		183	1486	5
Skin Cutaneous Melanoma (TCGA, PanCancer Atlas)	TCGA-FS-A1ZK-06	Cutaneous Melanoma	1	Q100*	OncoKB: NA;CIViC: NA;MyCancerGenome: not present;CancerHotspot: no;3DHotspot: no	MutationAssessor: NA;SIFT: NA;Polyphen-2: NA	Nonsense_Mutation	SNP	Gain		.	.	.	1	40928260	40928260	C	T	1:g.40928260C>T	ENST00000361584.3:c.298C>T	0.30		52	124		159	1453	5
Uterine Corpus Endometrial Carcinoma (TCGA, PanCancer Atlas)	TCGA-B5-A0JY-01	Uterine Endometrioid Carcinoma	1	R101I	OncoKB: NA;CIViC: NA;MyCancerGenome: not present;CancerHotspot: no;3DHotspot: no	MutationAssessor: impact: low, score: 1.135;SIFT: impact: tolerated, score: 0.14;Polyphen-2: impact: benign, score: 0.037	Missense_Mutation	SNP	Diploid		.	.	.	1	40928264	40928264	G	T	1:g.40928264G>T	ENST00000361584.3:c.302G>T	0.32		50	107		86	9686	5	0.00004246524927101322	Uncertain_significance	rs373664999
Uterine Corpus Endometrial Carcinoma (TCGA, PanCancer Atlas)	TCGA-AX-A0J0-01	Uterine Endometrioid Carcinoma	1	N131T	OncoKB: NA;CIViC: NA;MyCancerGenome: not present;CancerHotspot: no;3DHotspot: no	MutationAssessor: impact: neutral, score: 0.155;SIFT: impact: tolerated, score: 0.58;Polyphen-2: impact: benign, score: 0.005	Missense_Mutation	SNP	Diploid		.	.	.	1	40928354	40928354	A	C	1:g.40928354A>C	ENST00000361584.3:c.392A>C	0.53		46	41		81	7795	5
Bladder Urothelial Carcinoma (TCGA, PanCancer Atlas)	TCGA-CF-A3MH-01	Bladder Urothelial Carcinoma	1	R145T	OncoKB: NA;CIViC: NA;MyCancerGenome: not present;CancerHotspot: no;3DHotspot: no	MutationAssessor: impact: low, score: 1.125;SIFT: impact: tolerated, score: 0.26;Polyphen-2: impact: benign, score: 0.233	Missense_Mutation	SNP	Diploid		.	.	.	1	40928396	40928396	G	C	1:g.40928396G>C	ENST00000361584.3:c.434G>C	0.47		56	62		97	43	5
Uterine Corpus Endometrial Carcinoma (TCGA, PanCancer Atlas)	TCGA-AX-A05Z-01	Uterine Endometrioid Carcinoma	1	R147I	OncoKB: NA;CIViC: NA;MyCancerGenome: not present;CancerHotspot: no;3DHotspot: no	MutationAssessor: impact: medium, score: 1.995;SIFT: impact: tolerated, score: 0.08;Polyphen-2: impact: possibly_damaging, score: 0.679	Missense_Mutation	SNP	Diploid		.	.	.	1	40928402	40928402	G	T	1:g.40928402G>T	ENST00000361584.3:c.440G>T	0.05		18	332		373	7370	5
Colorectal Adenocarcinoma (TCGA, PanCancer Atlas)	TCGA-AA-3984-01	Colon Adenocarcinoma	1	K173T	OncoKB: NA;CIViC: NA;MyCancerGenome: not present;CancerHotspot: no;3DHotspot: no	MutationAssessor: impact: neutral, score: 0.495;SIFT: impact: tolerated, score: 0.06;Polyphen-2: impact: benign, score: 0.305	Missense_Mutation	SNP	Diploid		.	.	.	1	40928480	40928480	A	C	1:g.40928480A>C	ENST00000361584.3:c.518A>C	0.22		45	160		272	5113	5
Skin Cutaneous Melanoma (TCGA, PanCancer Atlas)	TCGA-D9-A6EC-06	Cutaneous Melanoma	1	K208T	OncoKB: NA;CIViC: NA;MyCancerGenome: not present;CancerHotspot: no;3DHotspot: no	MutationAssessor: impact: low, score: 0.815;SIFT: impact: tolerated, score: 0.2;Polyphen-2: impact: benign, score: 0.359	Missense_Mutation	SNP	Gain		.	.	.	1	40928585	40928585	A	C	1:g.40928585A>C	ENST00000361584.3:c.623A>C	0.38		27	44		65	3673	5
Head and Neck Squamous Cell Carcinoma (TCGA, PanCancer Atlas)	TCGA-CR-5248-01	Head and Neck Squamous Cell Carcinoma	1	P222S	OncoKB: NA;CIViC: NA;MyCancerGenome: not present;CancerHotspot: no;3DHotspot: no	MutationAssessor: impact: neutral, score: -1.375;SIFT: impact: tolerated, score: 0.73;Polyphen-2: impact: benign, score: 0.253	Missense_Mutation	SNP	Diploid		.	.	.	1	40928626	40928626	C	T	1:g.40928626C>T	ENST00000361584.3:c.664C>T	0.15		9	51		61	320	5
Skin Cutaneous Melanoma (TCGA, PanCancer Atlas)	TCGA-D3-A2JD-06	Cutaneous Melanoma	1	G229C	OncoKB: NA;CIViC: NA;MyCancerGenome: not present;CancerHotspot: no;3DHotspot: no	MutationAssessor: impact: high, score: 3.775;SIFT: impact: deleterious, score: 0;Polyphen-2: impact: probably_damaging, score: 1	Missense_Mutation	SNP	Gain		.	.	.	1	40928647	40928647	G	T	1:g.40928647G>T	ENST00000361584.3:c.685G>T	0.08		3	34		53	1227	5
Skin Cutaneous Melanoma (TCGA, PanCancer Atlas)	TCGA-DA-A1HV-06	Cutaneous Melanoma	1	E237K	OncoKB: NA;CIViC: NA;MyCancerGenome: not present;CancerHotspot: no;3DHotspot: no	MutationAssessor: impact: low, score: 1.565;SIFT: impact: deleterious, score: 0.01;Polyphen-2: impact: possibly_damaging, score: 0.847	Missense_Mutation	SNP	Diploid		.	.	.	1	40928671	40928671	G	A	1:g.40928671G>A	ENST00000361584.3:c.709G>A	0.43		19	25		43	1263	5
Skin Cutaneous Melanoma (TCGA, PanCancer Atlas)	TCGA-D3-A2JP-06	Cutaneous Melanoma	1	G239W	OncoKB: NA;CIViC: NA;MyCancerGenome: not present;CancerHotspot: no;3DHotspot: no	MutationAssessor: impact: high, score: 3.575;SIFT: impact: deleterious, score: 0;Polyphen-2: impact: probably_damaging, score: 1	Missense_Mutation	SNP	Diploid		.	.	.	1	40928677	40928677	G	T	1:g.40928677G>T	ENST00000361584.3:c.715G>T	0.11		4	33		40	4146	5
Stomach Adenocarcinoma (TCGA, PanCancer Atlas)	TCGA-BR-4366-01	Stomach Adenocarcinoma	1	H251Q	OncoKB: NA;CIViC: NA;MyCancerGenome: not present;CancerHotspot: no;3DHotspot: no	MutationAssessor: impact: high, score: 4.05;SIFT: impact: deleterious, score: 0;Polyphen-2: impact: probably_damaging, score: 0.999	Missense_Mutation	SNP	Gain		.	.	.	1	40928715	40928715	T	A	1:g.40928715T>A	ENST00000361584.3:c.753T>A	0.26		36	102		63	121	5
Uterine Corpus Endometrial Carcinoma (TCGA, PanCancer Atlas)	TCGA-AP-A1DV-01	Uterine Endometrioid Carcinoma	1	R253I	OncoKB: NA;CIViC: NA;MyCancerGenome: not present;CancerHotspot: no;3DHotspot: no	MutationAssessor: impact: medium, score: 2.505;SIFT: impact: deleterious, score: 0.04;Polyphen-2: impact: probably_damaging, score: 0.995	Missense_Mutation	SNP	Diploid		.	.	.	1	40928720	40928720	G	T	1:g.40928720G>T	ENST00000361584.3:c.758G>T	0.26		8	23		22	12039	5
Head and Neck Squamous Cell Carcinoma (TCGA, PanCancer Atlas)	TCGA-CV-7248-01	Head and Neck Squamous Cell Carcinoma	1	G257E	OncoKB: NA;CIViC: NA;MyCancerGenome: not present;CancerHotspot: no;3DHotspot: no	MutationAssessor: impact: low, score: 1.66;SIFT: impact: deleterious, score: 0;Polyphen-2: impact: probably_damaging, score: 1	Missense_Mutation	SNP	Diploid		.	.	.	1	40928732	40928732	G	A	1:g.40928732G>A	ENST00000361584.3:c.770G>A	0.12		6	44		55	267	5
Brain Lower Grade Glioma (TCGA, PanCancer Atlas)	TCGA-DU-7298-01	Astrocytoma	1	R264M	OncoKB: NA;CIViC: NA;MyCancerGenome: not present;CancerHotspot: no;3DHotspot: no	MutationAssessor: impact: low, score: 0.955;SIFT: impact: deleterious, score: 0;Polyphen-2: impact: possibly_damaging, score: 0.544	Missense_Mutation	SNP	Diploid		.	.	.	1	40928753	40928753	G	T	1:g.40928753G>T	ENST00000361584.3:c.791G>T	0.10		4	37		58	296	5
Lung Adenocarcinoma (TCGA, PanCancer Atlas)	TCGA-MP-A4SV-01	Lung Adenocarcinoma	1	K268T	OncoKB: NA;CIViC: NA;MyCancerGenome: not present;CancerHotspot: no;3DHotspot: no	MutationAssessor: impact: medium, score: 2.655;SIFT: impact: deleterious, score: 0;Polyphen-2: impact: probably_damaging, score: 0.995	Missense_Mutation	SNP	Diploid		.	.	.	1	40928765	40928765	A	C	1:g.40928765A>C	ENST00000361584.3:c.803A>C	0.08		4	45		55	298	5
Uterine Corpus Endometrial Carcinoma (TCGA, PanCancer Atlas)	TCGA-DF-A2KN-01	Uterine Endometrioid Carcinoma	1	C294Y	OncoKB: NA;CIViC: NA;MyCancerGenome: not present;CancerHotspot: no;3DHotspot: no	MutationAssessor: impact: high, score: 4;SIFT: impact: deleterious, score: 0.02;Polyphen-2: impact: probably_damaging, score: 1	Missense_Mutation	SNP	Diploid		.	.	.	1	40928843	40928843	G	A	1:g.40928843G>A	ENST00000361584.3:c.881G>A	0.38		9	15		24	4337	5
Skin Cutaneous Melanoma (TCGA, PanCancer Atlas)	TCGA-D3-A8GI-06	Cutaneous Melanoma	1	F298S	OncoKB: NA;CIViC: NA;MyCancerGenome: not present;CancerHotspot: no;3DHotspot: no	MutationAssessor: impact: high, score: 3.585;SIFT: impact: deleterious, score: 0;Polyphen-2: impact: probably_damaging, score: 1	Missense_Mutation	SNP	Gain		.	.	.	1	40928855	40928855	T	C	1:g.40928855T>C	ENST00000361584.3:c.893T>C	0.39		36	56		121	4277	5
Lung Squamous Cell Carcinoma (TCGA, PanCancer Atlas)	TCGA-22-4594-01	Lung Squamous Cell Carcinoma	1	F299L	OncoKB: NA;CIViC: NA;MyCancerGenome: not present;CancerHotspot: no;3DHotspot: no	MutationAssessor: impact: neutral, score: 0.425;SIFT: impact: tolerated, score: 0.1;Polyphen-2: impact: benign, score: 0.154	Missense_Mutation	SNP	Diploid		.	.	.	1	40928857	40928857	T	C	1:g.40928857T>C	ENST00000361584.3:c.895T>C	0.03		7	224		215	320	5			rs1645308247
Lung Adenocarcinoma (TCGA, PanCancer Atlas)	TCGA-93-8067-01	Lung Adenocarcinoma	1	R302K	OncoKB: NA;CIViC: NA;MyCancerGenome: not present;CancerHotspot: no;3DHotspot: no	MutationAssessor: impact: low, score: 0.95;SIFT: impact: tolerated, score: 0.08;Polyphen-2: impact: possibly_damaging, score: 0.869	Missense_Mutation	SNP	Diploid		.	.	.	1	40928867	40928867	G	A	1:g.40928867G>A	ENST00000361584.3:c.905G>A	0.22		26	92		68	450	5
Cervical Squamous Cell Carcinoma (TCGA, PanCancer Atlas)	TCGA-C5-A2LY-01	Cervical Squamous Cell Carcinoma	1	H311D	OncoKB: NA;CIViC: NA;MyCancerGenome: not present;CancerHotspot: no;3DHotspot: no	MutationAssessor: impact: medium, score: 3.305;SIFT: impact: deleterious, score: 0.03;Polyphen-2: impact: probably_damaging, score: 0.997	Missense_Mutation	SNP	Diploid		.	.	.	1	40928893	40928893	C	G	1:g.40928893C>G	ENST00000361584.3:c.931C>G	0.32		6	13		49	86	5
Bladder Urothelial Carcinoma (TCGA, PanCancer Atlas)	TCGA-FD-A6TA-01	Bladder Urothelial Carcinoma	1	F326L	OncoKB: NA;CIViC: NA;MyCancerGenome: not present;CancerHotspot: no;3DHotspot: no	MutationAssessor: impact: medium, score: 2.65;SIFT: impact: deleterious, score: 0;Polyphen-2: impact: probably_damaging, score: 0.992	Missense_Mutation	SNP	Diploid		.	.	.	1	40928940	40928940	C	A	1:g.40928940C>A	ENST00000361584.3:c.978C>A	0.34		23	45		61	251	5	0.00000796356		rs774650239
Skin Cutaneous Melanoma (TCGA, PanCancer Atlas)	TCGA-D3-A2JB-06	Cutaneous Melanoma	1	Q336K	OncoKB: NA;CIViC: NA;MyCancerGenome: not present;CancerHotspot: no;3DHotspot: no	MutationAssessor: impact: neutral, score: 0.58;SIFT: impact: deleterious, score: 0.03;Polyphen-2: impact: probably_damaging, score: 0.977	Missense_Mutation	SNP	Diploid		.	.	.	1	40928968	40928968	C	A	1:g.40928968C>A	ENST00000361584.3:c.1006C>A	0.08		3	33		64	892	5
Breast Invasive Carcinoma (TCGA, PanCancer Atlas)	TCGA-AN-A046-01	Breast Invasive Ductal Carcinoma	1	R337I	OncoKB: NA;CIViC: NA;MyCancerGenome: not present;CancerHotspot: no;3DHotspot: no	MutationAssessor: impact: medium, score: 2.04;SIFT: impact: deleterious, score: 0;Polyphen-2: impact: probably_damaging, score: 0.979	Missense_Mutation	SNP	ShallowDel		.	.	.	1	40928972	40928972	G	T	1:g.40928972G>T	ENST00000361584.3:c.1010G>T	0.28		76	193		317	5400	5			rs766986080
Colorectal Adenocarcinoma (TCGA, PanCancer Atlas)	TCGA-CA-6717-01	Mucinous Adenocarcinoma of the Colon and Rectum	1	R357I	OncoKB: NA;CIViC: NA;MyCancerGenome: not present;CancerHotspot: no;3DHotspot: no	MutationAssessor: impact: low, score: 1.31;SIFT: impact: deleterious, score: 0.01;Polyphen-2: impact: probably_damaging, score: 0.933	Missense_Mutation	SNP	Diploid		.	.	.	1	40929032	40929032	G	T	1:g.40929032G>T	ENST00000361584.3:c.1070G>T	0.10	0.02	5	43	1	56	9586	5
Stomach Adenocarcinoma (TCGA, PanCancer Atlas)	TCGA-BR-6706-01	Stomach Adenocarcinoma	1	Q364R	OncoKB: NA;CIViC: NA;MyCancerGenome: not present;CancerHotspot: no;3DHotspot: no	MutationAssessor: impact: neutral, score: 0.025;SIFT: impact: deleterious, score: 0.03;Polyphen-2: impact: benign, score: 0.003	Missense_Mutation	SNP	Diploid		.	.	.	1	40929053	40929053	A	G	1:g.40929053A>G	ENST00000361584.3:c.1091A>G	0.09		5	50		58	191	5
Stomach Adenocarcinoma (TCGA, PanCancer Atlas)	TCGA-HU-A4GC-01	Diffuse Type Stomach Adenocarcinoma	1	V366L	OncoKB: NA;CIViC: NA;MyCancerGenome: not present;CancerHotspot: no;3DHotspot: no	MutationAssessor: impact: low, score: 0.94;SIFT: impact: deleterious, score: 0.02;Polyphen-2: impact: possibly_damaging, score: 0.712	Missense_Mutation	SNP	Diploid		.	.	.	1	40929058	40929058	G	C	1:g.40929058G>C	ENST00000361584.3:c.1096G>C	0.11		6	47		79	115	5
Bladder Urothelial Carcinoma (TCGA, PanCancer Atlas)	TCGA-FD-A6TA-01	Bladder Urothelial Carcinoma	1	H377D	OncoKB: NA;CIViC: NA;MyCancerGenome: not present;CancerHotspot: no;3DHotspot: no	MutationAssessor: impact: neutral, score: 0.6;SIFT: impact: tolerated, score: 0.2;Polyphen-2: impact: benign, score: 0.003	Missense_Mutation	SNP	Diploid		.	.	.	1	40929091	40929091	C	G	1:g.40929091C>G	ENST00000361584.3:c.1129C>G	0.26		21	59		56	251	5			rs1645311718
Breast Invasive Carcinoma (TCGA, PanCancer Atlas)	TCGA-AO-A03M-01	Breast Invasive Ductal Carcinoma	1	S387F	OncoKB: NA;CIViC: NA;MyCancerGenome: not present;CancerHotspot: no;3DHotspot: no	MutationAssessor: impact: medium, score: 2.13;SIFT: impact: tolerated, score: 0.1;Polyphen-2: impact: possibly_damaging, score: 0.823	Missense_Mutation	SNP	Diploid		.	.	.	1	40929122	40929122	C	T	1:g.40929122C>T	ENST00000361584.3:c.1160C>T	0.14		14	84		167	754	5
Esophageal Adenocarcinoma (TCGA, PanCancer Atlas)	TCGA-VR-A8EU-01	Esophageal Squamous Cell Carcinoma	1	Y401C	OncoKB: NA;CIViC: NA;MyCancerGenome: not present;CancerHotspot: no;3DHotspot: no	MutationAssessor: impact: medium, score: 3.08;SIFT: impact: deleterious, score: 0;Polyphen-2: impact: probably_damaging, score: 0.996	Missense_Mutation	SNP	Diploid		.	.	.	1	40929164	40929164	A	G	1:g.40929164A>G	ENST00000361584.3:c.1202A>G	0.22		8	28		45	85	5
Lung Adenocarcinoma (TCGA, PanCancer Atlas)	TCGA-05-4410-01	Lung Adenocarcinoma	1	R418I	OncoKB: NA;CIViC: NA;MyCancerGenome: not present;CancerHotspot: no;3DHotspot: no	MutationAssessor: impact: low, score: 1.43;SIFT: impact: deleterious, score: 0.01;Polyphen-2: impact: probably_damaging, score: 0.981	Missense_Mutation	SNP	Diploid		.	.	.	1	40929215	40929215	G	T	1:g.40929215G>T	ENST00000361584.3:c.1253G>T	0.09		6	58		81	1014	5
Uterine Corpus Endometrial Carcinoma (TCGA, PanCancer Atlas)	TCGA-BS-A0UV-01	Uterine Endometrioid Carcinoma	1	H423L	OncoKB: NA;CIViC: NA;MyCancerGenome: not present;CancerHotspot: no;3DHotspot: no	MutationAssessor: impact: high, score: 3.845;SIFT: impact: deleterious, score: 0;Polyphen-2: impact: probably_damaging, score: 0.995	Missense_Mutation	SNP	Diploid		.	.	.	1	40929230	40929230	A	T	1:g.40929230A>T	ENST00000361584.3:c.1268A>T	0.42		19	26		66	8969	5
Colorectal Adenocarcinoma (TCGA, PanCancer Atlas)	TCGA-AA-A010-01	Colon Adenocarcinoma	1	N426H	OncoKB: NA;CIViC: NA;MyCancerGenome: not present;CancerHotspot: no;3DHotspot: no	MutationAssessor: impact: low, score: 1.34;SIFT: impact: deleterious_low_confidence, score: 0;Polyphen-2: impact: possibly_damaging, score: 0.819	Missense_Mutation	SNP	Diploid		.	.	.	1	40929238	40929238	A	C	1:g.40929238A>C	ENST00000361584.3:c.1276A>C	0.39		41	64		70	7493	5
Acute Myeloid Leukemia (TCGA, PanCancer Atlas)	TCGA-AB-2826-03	Acute Myeloid Leukemia	1	H437D	OncoKB: NA;CIViC: NA;MyCancerGenome: not present;CancerHotspot: no;3DHotspot: no	MutationAssessor: impact: high, score: 3.905;SIFT: impact: deleterious, score: 0;Polyphen-2: impact: probably_damaging, score: 0.998	Missense_Mutation	SNP	Diploid		.	.	.	1	40928965	40928965	C	G	1:g.40928965C>G	ENST00000361584.3:c.1003C>G	0.15		33	186		127	636	5
