# Supplementary material for: ZNF643/ZFP69B Exerts Oncogenic Properties and Associates with Cell Adhesion and Immune Processes
Source: Int J Mol Sci. 2023 Nov 15;24(22):16380. doi: 10.3390/ijms242216380 (PMC10671213; doi:10.3390/ijms242216380)
Supplement: Supplementary file 1 [file ijms-24-16380-s001.zip › Supplemental File S2.xlsx]

## Sheet: Description
Supplemental File 2. A mutational status of p53 in SKMES and H2073 cell lines. The data show non-sense and missense (respectively) likely loss-of-function mutations in p53 gene. The data is downloaded from https://depmap.org/portal/gene/TP53?tab=characterization&characterization=mutation.

## Sheet: p53 status in SKMES and H2073
Cell Line	Depmap Id	Primary Disease	Disease Subtype	Lineage	Lineage Subtype	Chromosome	Position	Variant Type	Variant Info	Ref Allele	Alt Allele	Allele Fraction	Ref Count	Alt Count	GT	Phasing Set	DNA Change	Protein Change	HGNC Name	HGNC Family	Transcript	Transcript Exon	Transcript Strand	Uniprot ID	Short Tandem Repeat	dbSNP ID	dbSNP Filter	Issues	GC Content	Lineage Association	Cancer Molecular Genetics	CCLE Deleterious	Structural Relation	COSMIC Hotspot	COSMIC Overlapping Mutations	Associated With	LOF	Driver	Likely Driver	Transcript Likely LOF	CIViC ID	CIViC Description	CIViC Score	Population Allele Frequency	Likely GOF	Likely LOF	Hess Driver	Hess Signature	Cscape Score
SKMES1	ACH-000665	Non-Small Cell Lung Cancer	Lung Squamous Cell Carcinoma	Lung	Non-Small Cell Lung Cancer	chr17	7673728	SNP	NONSENSE	C	A	0.975	0	38	1|1		c.892G>T	p.E298*	tumor protein p53		ENST00000269305.8	8	-	P04637	False	rs201744589		as_specific	0.516209	"L, E, M, O"	Rec	True	NTRK1	True	p.0(9) p.E298*(55) p.E298D(2) p.H296_S303delHHELPPGS(1) p.E298Q(1) p.E298K(3) p.E298G(1) p.E298_P301delELPP(1) p.E298V(2) p.L299fs*2(1) p.G293fs*1(1) p.E298A(1) p.L265_K305del41(1) p.E298fs*43(1) p.E298E(1) p.E298fs*53(1) p.E298fs*48(1) p.E298fs*47(1)	cancer;gene_function_loss;dna_repair;structural_relation;	False	False	True					7.3	False	True	True	smoking:11,Misc:2	0.975532
NCIH2073	ACH-000590	Non-Small Cell Lung Cancer	Lung Adenocarcinoma	Lung	Non-Small Cell Lung Cancer	chr17	7674237	SNP	MISSENSE	G	C	0.884	4	43	0/1		c.726C>G	p.C242W	tumor protein p53		ENST00000269305.8	7	-	P04637	False	rs375874539		as_specific	0.566085	"L, E, M, O"	Rec	False	NTRK1	True	p.0(9) p.C242fs*20(2) p.C242F(85) p.C242Y(54) p.C242S(35) p.C242*(5) p.H233_C242del10(1) p.N239_C242delNSSC(3) p.C242fs*5(21) p.C242W(6) p.C242G(4) p.C242R(13) p.N239fs*4(1) p.C242C(4) p.C242fs*98(1) p.C242fs*?(3) p.S241_G245delSCMGG(1) p.S241_C242del(2) p.C238_M246delCNSSCMGGM(1) p.?(1) p.C238_M243delCNSSCM(1) p.N239_C242>S(1) p.Y236_M243delYMCNSSCM(1) p.S241_C242delSC(1) p.S241_C242insX(1) p.C2…	gene_function_loss;dna_repair;structural_relation;	False	False	False	ENST00000413465;ENST00000359597;ENST00000504290;ENST00000510385;ENST00000504937;ENST00000619186;ENST00000618944;ENST00000610623;ENST00000610292;ENST00000269305;ENST00000620739;ENST00000617185;ENST00000455263;ENST00000420246;ENST00000622645;ENST00000610538;ENST00000445888;ENST00000619485;ENST00000615910;ENST00000509690;ENST00000514944;				7.3	False	True	False		0.878625
[truncated: 9 more columns]
