# Supplementary material for: ZNF643/ZFP69B Exerts Oncogenic Properties and Associates with Cell Adhesion and Immune Processes
Source: Int J Mol Sci. 2023 Nov 15;24(22):16380. doi: 10.3390/ijms242216380 (PMC10671213; doi:10.3390/ijms242216380)
Supplement: Supplementary file 1 [file ijms-24-16380-s001.zip › Supplemental File S3.xlsx]

## Sheet: Description
Supplemental File 3. Biological processes (All), Cellular Component CC1, KEGG pathways, and tumor supprossor and cell adhesion genes associated with the ZNF643 binding sites. The table represents all categories identified for the genes overlapping and genes with TSS closest to ZNF643 binding regions. The data were retrieved from the DAVID database. For simplicity, GO BP All selected for Figure 6 …

## Sheet: GO BP All
Category	Term	Count	%	PValue	Genes	List Total	Pop Hits	Pop Total	Fold Enrichment	Bonferroni	Benjamini	FDR
GOTERM_BP_ALL	GO:0043067~regulation of programmed cell death	27	11.4407	5.77073e-05	7466, 5664, 6093, 90, 6469, 10891, 9759, 11124, 3778, 50515, 8022, 8440, 6464, 8744, 26524, 55294, 1800, 23390, 10769, 255488, 103, 57630, 8835, 3685, 4313, 5468, 8915	135	1656	19414	2.34469	0.183503	0.0959594	0.0954404
GOTERM_BP_ALL	GO:0010941~regulation of cell death	28	11.8644	8.66525e-05	7466, 5664, 6093, 90, 6469, 10891, 9759, 11124, 3778, 50515, 8022, 8440, 6464, 8744, 26524, 55294, 1800, 23390, 10769, 255488, 103, 57630, 8835, 3685, 4313, 5468, 1948, 8915	135	1798	19414	2.23949	0.262451	0.0959594	0.0954404
GOTERM_BP_ALL	GO:0042981~regulation of apoptotic process	26	11.0169	0.000107157	7466, 5664, 6093, 90, 6469, 10891, 9759, 11124, 3778, 50515, 8022, 8440, 6464, 8744, 26524, 55294, 1800, 10769, 255488, 103, 57630, 8835, 3685, 4313, 5468, 8915	135	1619	19414	2.30945	0.313714	0.0959594	0.0954404
GOTERM_BP_ALL	GO:0044092~negative regulation of molecular function	20	8.47458	0.000109262	7077, 7341, 7466, 5585, 5575, 6236, 26524, 6093, 55294, 1800, 288, 103, 57630, 28234, 3685, 6469, 9759, 5468, 115072896, 53836	135	1050	19414	2.73919	0.318772	0.0959594	0.0954404
GOTERM_BP_ALL	GO:0016043~cellular component organization	71	30.0847	0.000169582	5187, 5585, 347240, 5664, 4773, 26115, 161176, 9260, 1063, 1183, 1062, 23523, 1015, 58476, 23043, 54795, 1012, 10891, 6469, 8925, 643615, 9510, 55809, 8022, 26524, 55294, 23613, 288, 29115, 388697, 3685, 5468, 1948, 10188, 3801, 9509, 7341, 25806, 8675, 1284, 23026, 6093, 100505385, 8470, 54892, 100132463, 57724, 54971, 9759, 11124, 89796, 3778, 5175, 8440, 6464, 1010, 23673, 401541, 25897, 2060,…	135	7129	19414	1.43222	0.448873	0.105667	0.105096
GOTERM_BP_ALL	GO:0007166~cell surface receptor signaling pathway	38	16.1017	0.000184069	22856, 25806, 64599, 5664, 4773, 1284, 23523, 8470, 1015, 23043, 54795, 90, 1012, 6469, 9759, 11124, 50515, 1438, 9510, 5175, 8440, 6464, 8744, 5575, 26524, 55294, 103, 57630, 1288, 8835, 3685, 4313, 5468, 10188, 1948, 5602, 53836, 8915	135	2975	19414	1.83687	0.476226	0.105667	0.105096
GOTERM_BP_ALL	GO:0042176~regulation of protein catabolic process	12	5.08475	0.000210553	7077, 7341, 10769, 255488, 7466, 57630, 54971, 6469, 11124, 25897, 6093, 55294	135	433	19414	3.98542	0.522767	0.105667	0.105096
GOTERM_BP_ALL	GO:0008219~cell death	31	13.1356	0.000291272	5163, 11083, 7466, 5585, 5664, 6093, 90, 6469, 10891, 9759, 11124, 3778, 50515, 8022, 8440, 6464, 8744, 26524, 55294, 1800, 23390, 10769, 255488, 103, 57630, 8835, 3685, 4313, 5468, 1948, 8915	135	2257	19414	1.9752	0.640624	0.112681	0.112071
GOTERM_BP_ALL	GO:0016337~single organismal cell-cell adhesion	15	6.35593	0.000314554	5175, 8440, 8744, 1010, 6093, 288, 1015, 57630, 1012, 90, 3685, 6469, 1948, 3801, 8915	135	693	19414	3.11271	0.668856	0.112681	0.112071
GOTERM_BP_ALL	GO:0006915~apoptotic process	28	11.8644	0.000320754	5163, 11083, 7466, 5585, 5664, 6093, 90, 6469, 10891, 9759, 11124, 3778, 50515, 8022, 8440, 6464, 26524, 55294, 1800, 10769, 255488, 103, 57630, 8835, 3685, 4313, 5468, 8915	135	1947	19414	2.06811	0.675993	0.112681	0.112071
GOTERM_BP_ALL	GO:0071840~cellular component organization or biogenesis	71	30.0847	0.000465585	5187, 5585, 347240, 5664, 4773, 26115, 161176, 9260, 1063, 1183, 1062, 23523, 1015, 58476, 23043, 54795, 1012, 10891, 6469, 8925, 643615, 9510, 55809, 8022, 26524, 55294, 23613, 288, 29115, 388697, 3685, 5468, 1948, 10188, 3801, 9509, 7341, 25806, 8675, 1284, 23026, 6093, 100505385, 8470, 54892, 100132463, 57724, 54971, 9759, 11124, 89796, 3778, 5175, 8440, 6464, 1010, 23673, 401541, 25897, 2060,…	135	7345	19414	1.39011	0.805239	0.145858	0.145069
GOTERM_BP_ALL	GO:0012501~programmed cell death	29	12.2881	0.000498235	5163, 11083, 7466, 5585, 5664, 6093, 90, 6469, 10891, 9759, 11124, 3778, 50515, 8022, 8440, 6464, 8744, 26524, 55294, 1800, 10769, 255488, 103, 57630, 8835, 3685, 4313, 5468, 8915	135	2110	19414	1.9765	0.826354	0.145858	0.145069
GOTERM_BP_ALL	GO:0048519~negative regulation of biological process	61	25.8475	0.000764995	5187, 5585, 347240, 6236, 5664, 4773, 1063, 58476, 55841, 54795, 90, 1012, 10891, 6469, 50514, 8925, 50515, 9510, 55809, 8022, 6002, 26524, 55294, 23613, 288, 57630, 3685, 5468, 1948, 53836, 7341, 22856, 22978, 25806, 7466, 26137, 1284, 23026, 6093, 100505385, 116113, 54971, 28234, 9759, 11124, 115072896, 3778, 7077, 8440, 6464, 5575, 221937, 56241, 1800, 10769, 255488, 103, 8835, 4313, 51715, 89…	135	6097	19414	1.43878	0.932014	0.181799	0.180816
GOTERM_BP_ALL	GO:0043066~negative regulation of apoptotic process	17	7.20339	0.000786897	8022, 7466, 6464, 5664, 6093, 1800, 10769, 255488, 103, 57630, 90, 8835, 3685, 6469, 10891, 8915, 50515	135	942	19414	2.59525	0.937053	0.181799	0.180816
GOTERM_BP_ALL	GO:0009894~regulation of catabolic process	17	7.20339	0.00079581	7077, 7341, 7466, 221937, 26137, 25897, 6093, 55294, 10769, 255488, 58476, 57630, 54971, 6469, 9759, 11124, 8925	135	943	19414	2.5925	0.938995	0.181799	0.180816
GOTERM_BP_ALL	GO:0007165~signal transduction	62	26.2712	0.000828006	5187, 5585, 64599, 6236, 5664, 4773, 23523, 1015, 23043, 55841, 54795, 90, 1012, 6469, 50515, 9510, 55809, 8744, 6002, 26524, 55890, 57590, 55294, 288, 57630, 3685, 5468, 5623, 1948, 10188, 53836, 5163, 22856, 6452, 11083, 25806, 7466, 1284, 23026, 1040, 6093, 100505385, 8470, 57724, 9759, 11124, 57605, 1438, 5175, 8440, 6464, 5575, 112616, 23390, 10769, 103, 1288, 8835, 4313, 5602, 5603, 8915	135	6248	19414	1.42703	0.945524	0.181799	0.180816
GOTERM_BP_ALL	GO:0018193~peptidyl-amino acid modification	20	8.47458	0.000888892	7341, 5175, 8440, 5187, 6464, 5585, 26524, 6093, 55294, 57337, 23390, 10208, 10769, 54795, 90, 6469, 10891, 9759, 10188, 5603	135	1242	19414	2.31574	0.956022	0.183687	0.182693
GOTERM_BP_ALL	GO:0098602~single organism cell adhesion	15	6.35593	0.00094541	5175, 8440, 8744, 1010, 6093, 288, 1015, 57630, 1012, 90, 3685, 6469, 1948, 3801, 8915	135	775	19414	2.78337	0.963948	0.184513	0.183515
GOTERM_BP_ALL	GO:0043069~negative regulation of programmed cell death	17	7.20339	0.00108294	8022, 7466, 6464, 5664, 6093, 1800, 10769, 255488, 103, 57630, 90, 8835, 3685, 6469, 10891, 8915, 50515	135	971	19414	2.51774	0.977773	0.20023	0.199147
GOTERM_BP_ALL	GO:0001525~angiogenesis	13	5.50847	0.00126748	9510, 6464, 1284, 6093, 55294, 10769, 1012, 90, 3685, 6469, 4313, 5468, 1948	135	622	19414	3.00562	0.988385	0.222633	0.221429
GOTERM_BP_ALL	GO:1900181~negative regulation of protein localization to nucleus	5	2.11864	0.00139877	7341, 5468, 11124, 26524, 51715	135	70	19414	10.272	0.992681	0.228357	0.227121
GOTERM_BP_ALL	GO:0048869~cellular developmental process	49	20.7627	0.00149211	4773, 26115, 161176, 9260, 23762, 1063, 1015, 58476, 23043, 54795, 90, 1012, 10891, 6469, 8925, 50515, 8022, 8744, 26524, 55294, 288, 57630, 388697, 3685, 5468, 1948, 10188, 22856, 25806, 9644, 1284, 23026, 1040, 6093, 8470, 54892, 9759, 89796, 5175, 8440, 221937, 1010, 112616, 23390, 10769, 103, 8835, 4313, 5602	135	4676	19414	1.50696	0.99473	0.228357	0.227121
GOTERM_BP_ALL	GO:0048522~positive regulation of cellular process	59	25	0.00158466	5187, 5585, 4773, 9260, 1062, 1015, 58476, 23043, 54795, 90, 1012, 10891, 6469, 643615, 284371, 9510, 55809, 8022, 8744, 26524, 57590, 55294, 23613, 288, 57630, 29115, 3685, 5468, 1948, 10188, 60481, 7341, 22856, 7466, 26137, 1040, 6093, 100505385, 54892, 9759, 11124, 5558, 3778, 1438, 5175, 8440, 6464, 5575, 221937, 116931, 25897, 23390, 10769, 255488, 103, 8835, 54505, 4313, 8915	135	5994	19414	1.41552	0.996195	0.228357	0.227121
GOTERM_BP_ALL	GO:0050794~regulation of cellular process	101	42.7966	0.00159003	6236, 5664, 161176, 1063, 1062, 338699, 23043, 55841, 90, 6469, 10891, 8925, 9510, 8022, 7574, 6002, 57590, 55294, 23613, 57630, 60481, 53836, 7341, 5163, 22856, 22978, 7466, 26137, 23026, 6093, 54892, 116113, 9759, 115072896, 5558, 3778, 7077, 5175, 8440, 91661, 5575, 1800, 23390, 10769, 8835, 5602, 5603, 5187, 347240, 5585, 64599, 4773, 26115, 9260, 23523, 1015, 58476, 54795, 1012, 50514, 9819,…	135	12083	19414	1.20206	0.996266	0.228357	0.227121
GOTERM_BP_ALL	GO:0006793~phosphorus metabolic process	38	16.1017	0.00162508	5163, 22978, 5187, 5585, 26137, 1040, 1062, 6093, 23043, 90, 10891, 9759, 57605, 1438, 5175, 8440, 6464, 5575, 221937, 26524, 55294, 23390, 10769, 103, 57630, 8835, 5522, 3685, 5468, 10188, 9945, 5602, 60481, 5603, 51715, 54947, 53836, 8915	135	3328	19414	1.64203	0.996699	0.228357	0.227121
GOTERM_BP_ALL	GO:0001649~osteoblast differentiation	8	3.38983	0.00173263	103, 58476, 90, 54795, 6469, 9759, 9260, 5468	135	249	19414	4.62032	0.997739	0.234106	0.232839
GOTERM_BP_ALL	GO:0045732~positive regulation of protein catabolic process	8	3.38983	0.00189634	7341, 10769, 255488, 7466, 57630, 11124, 25897, 55294	135	253	19414	4.54727	0.998729	0.24068	0.239379
GOTERM_BP_ALL	GO:0006796~phosphate-containing compound metabolic process	37	15.678	0.00191832	5163, 22978, 5187, 5585, 26137, 1040, 1062, 6093, 23043, 90, 10891, 9759, 57605, 1438, 5175, 8440, 6464, 5575, 221937, 26524, 55294, 23390, 10769, 103, 57630, 8835, 5522, 3685, 5468, 10188, 9945, 5602, 5603, 51715, 54947, 53836, 8915	135	3238	19414	1.64326	0.998824	0.24068	0.239379
GOTERM_BP_ALL	GO:1903533~regulation of protein targeting	7	2.9661	0.00229774	7341, 288, 6469, 5468, 11124, 51715, 55294	135	194	19414	5.18893	0.999691	0.252539	0.251173
GOTERM_BP_ALL	GO:0001944~vasculature development	15	6.35593	0.00234459	9510, 5175, 6464, 4773, 1284, 6093, 55294, 10769, 1012, 90, 3685, 6469, 4313, 5468, 1948	135	854	19414	2.52589	0.999738	0.252539	0.251173
GOTERM_BP_ALL	GO:0072358~cardiovascular system development	15	6.35593	0.00234459	9510, 5175, 6464, 4773, 1284, 6093, 55294, 10769, 1012, 90, 3685, 6469, 4313, 5468, 1948	135	854	19414	2.52589	0.999738	0.252539	0.251173
GOTERM_BP_ALL	GO:0031331~positive regulation of cellular catabolic process	10	4.23729	0.00245747	7341, 10769, 255488, 58476, 57630, 26137, 11124, 25897, 6093, 55294	135	417	19414	3.44862	0.999824	0.252539	0.251173
GOTERM_BP_ALL	GO:0009896~positive regulation of catabolic process	11	4.66102	0.00252149	7341, 10769, 255488, 7466, 58476, 57630, 26137, 11124, 25897, 6093, 55294	135	501	19414	3.15745	0.999859	0.252539	0.251173
GOTERM_BP_ALL	GO:0048731~system development	52	22.0339	0.00265731	5585, 4773, 26115, 9260, 1063, 1015, 23043, 54795, 90, 1012, 10891, 6469, 8925, 50515, 9510, 8022, 8744, 26524, 55294, 23613, 288, 57630, 388697, 3685, 5468, 5623, 1948, 9509, 22856, 25806, 7466, 9644, 1284, 23026, 6093, 8470, 54892, 116113, 9759, 89796, 5175, 8440, 6464, 221937, 112616, 23390, 10769, 103, 8835, 4313, 51715, 8915	135	5190	19414	1.44084	0.999913	0.252539	0.251173
GOTERM_BP_ALL	GO:0031329~regulation of cellular catabolic process	14	5.9322	0.00269628	7077, 7341, 221937, 26137, 25897, 6093, 55294, 10769, 255488, 58476, 57630, 6469, 11124, 8925	135	773	19414	2.60453	0.999924	0.252539	0.251173
GOTERM_BP_ALL	GO:0035556~intracellular signal transduction	33	13.9831	0.00270212	5163, 5187, 7466, 5585, 6236, 5664, 4773, 23026, 6093, 100505385, 23043, 55841, 54795, 1012, 6469, 9759, 11124, 57605, 1438, 8440, 6464, 26524, 55294, 23390, 10769, 57630, 8835, 3685, 5468, 10188, 5602, 5603, 8915	135	2823	19414	1.68106	0.999926	0.252539	0.251173
GOTERM_BP_ALL	GO:1901343~negative regulation of vasculature development	7	2.9661	0.00274105	9510, 10769, 6464, 4773, 5468, 1284, 6093	135	201	19414	5.00822	0.999935	0.252539	0.251173
GOTERM_BP_ALL	GO:0016477~cell migration	22	9.32203	0.00281888	9510, 5175, 8440, 5585, 4773, 6093, 55294, 23613, 1800, 10769, 57630, 55841, 54795, 1012, 90, 3685, 6469, 9759, 4313, 5468, 1948, 89796	135	1585	19414	1.99606	0.999951	0.252539	0.251173
GOTERM_BP_ALL	GO:0048518~positive regulation of biological process	63	26.6949	0.00288842	5187, 5585, 4773, 9260, 1062, 338699, 1015, 58476, 23043, 54795, 90, 1012, 10891, 6469, 643615, 284371, 9510, 55809, 8022, 8744, 26524, 57590, 55294, 23613, 288, 57630, 29115, 3685, 5468, 1948, 10188, 60481, 7341, 22856, 7466, 26137, 1040, 6093, 100505385, 54892, 57724, 9759, 11124, 5558, 3778, 1438, 5175, 8440, 6464, 5575, 221937, 116931, 25897, 23390, 10769, 255488, 103, 8835, 54505, 170370, 43…	135	6679	19414	1.35647	0.999961	0.252539	0.251173
GOTERM_BP_ALL	GO:0060548~negative regulation of cell death	17	7.20339	0.00292847	8022, 7466, 6464, 5664, 6093, 1800, 10769, 255488, 103, 57630, 90, 8835, 3685, 6469, 10891, 8915, 50515	135	1071	19414	2.28266	0.999966	0.252539	0.251173
GOTERM_BP_ALL	GO:0007043~cell-cell junction assembly	6	2.54237	0.00297055	5175, 100132463, 1015, 1012, 1010, 6093	135	141	19414	6.11946	0.999971	0.252539	0.251173
GOTERM_BP_ALL	GO:0007154~cell communication	64	27.1186	0.00301925	5187, 5585, 64599, 6236, 5664, 4773, 23523, 1015, 23043, 55841, 54795, 90, 1012, 6469, 50515, 9510, 55809, 8744, 6002, 26524, 55890, 57590, 55294, 288, 57630, 3685, 5468, 5623, 1948, 10188, 53836, 5163, 22856, 6452, 11083, 25806, 7466, 1284, 23026, 1040, 6093, 100505385, 8470, 57724, 54212, 9759, 11124, 57605, 1438, 5175, 8440, 6464, 5575, 25897, 112616, 23390, 10769, 103, 1288, 8835, 4313, 5602,…	135	6827	19414	1.34813	0.999976	0.252539	0.251173
GOTERM_BP_ALL	GO:0045216~cell-cell junction organization	8	3.38983	0.00320864	5175, 100132463, 1015, 1012, 1010, 1948, 6093, 3801	135	278	19414	4.13834	0.999988	0.257009	0.255619
GOTERM_BP_ALL	GO:0044700~single organism signaling	63	26.6949	0.0033645	5187, 5585, 64599, 6236, 5664, 4773, 23523, 1015, 23043, 55841, 54795, 90, 1012, 6469, 50515, 9510, 55809, 8744, 6002, 26524, 55890, 57590, 55294, 288, 57630, 3685, 5468, 5623, 1948, 10188, 53836, 5163, 22856, 6452, 11083, 25806, 7466, 1284, 23026, 1040, 6093, 100505385, 8470, 57724, 9759, 11124, 57605, 1438, 5175, 8440, 6464, 5575, 25897, 112616, 23390, 10769, 103, 1288, 8835, 4313, 5602, 5603, …	135	6718	19414	1.3486	0.999993	0.257009	0.255619
GOTERM_BP_ALL	GO:0050789~regulation of biological process	104	44.0678	0.00356002	6236, 5664, 161176, 1063, 1062, 338699, 23043, 55841, 90, 6469, 10891, 8925, 9510, 8022, 7574, 6002, 57590, 55294, 23613, 57630, 60481, 53836, 7341, 5163, 22856, 22978, 7466, 26137, 23026, 6093, 54892, 116113, 9759, 115072896, 5558, 3778, 7077, 5175, 8440, 91661, 5575, 1800, 23390, 10769, 8835, 5602, 5603, 51715, 5187, 347240, 5585, 64599, 4773, 26115, 9260, 23523, 1015, 58476, 54795, 1012, 50514…	135	12773	19414	1.17091	0.999996	0.257009	0.255619
GOTERM_BP_ALL	GO:0001503~ossification	10	4.23729	0.00366638	22856, 103, 58476, 90, 54795, 6469, 9759, 4313, 9260, 5468	135	443	19414	3.24622	0.999998	0.257009	0.255619
GOTERM_BP_ALL	GO:0050896~response to stimulus	83	35.1695	0.00374819	5187, 5585, 64599, 6236, 5664, 4773, 1063, 1260, 23523, 338699, 83998, 1015, 23043, 55841, 54795, 90, 1012, 10891, 6469, 9819, 50515, 91442, 9510, 55809, 8022, 8744, 6002, 26524, 55890, 57590, 55294, 23613, 288, 57630, 29115, 3685, 5468, 5623, 1948, 10188, 9945, 53836, 7341, 5163, 22856, 6452, 22978, 11083, 25806, 7466, 26137, 1284, 23026, 1040, 6093, 100505385, 8470, 57724, 28234, 9759, 11124, 5…	135	9580	19414	1.24593	0.999998	0.257009	0.255619
GOTERM_BP_ALL	GO:0006508~proteolysis	24	10.1695	0.00381029	7077, 7341, 9510, 7466, 219333, 5664, 25897, 6093, 55294, 1800, 57337, 10208, 79258, 255488, 58476, 57630, 28234, 6469, 4313, 5468, 11124, 115072896, 9509, 8915	135	1846	19414	1.86965	0.999999	0.257009	0.255619
GOTERM_BP_ALL	GO:0001568~blood vessel development	14	5.9322	0.00392683	9510, 5175, 6464, 1284, 6093, 55294, 10769, 1012, 90, 3685, 6469, 4313, 5468, 1948	135	808	19414	2.49171	0.999999	0.257009	0.255619
GOTERM_BP_ALL	GO:0042308~negative regulation of protein import into nucleus	4	1.69492	0.00392978	7341, 5468, 11124, 51715	135	46	19414	12.505	0.999999	0.257009	0.255619
GOTERM_BP_ALL	GO:1904590~negative regulation of protein import	4	1.69492	0.00392978	7341, 5468, 11124, 51715	135	46	19414	12.505	0.999999	0.257009	0.255619
GOTERM_BP_ALL	GO:0048514~blood vessel morphogenesis	13	5.50847	0.00402589	9510, 6464, 1284, 6093, 55294, 10769, 1012, 90, 3685, 6469, 4313, 5468, 1948	135	716	19414	2.61103	0.999999	0.257009	0.255619
GOTERM_BP_ALL	GO:1901861~regulation of muscle tissue development	6	2.54237	0.00409512	90, 6469, 10891, 9759, 1063, 1948	135	152	19414	5.67661	0.999999	0.257009	0.255619
GOTERM_BP_ALL	GO:0006464~cellular protein modification process	42	17.7966	0.00417152	7341, 5163, 22978, 5187, 7466, 5585, 1062, 6093, 23043, 54795, 90, 6469, 10891, 9759, 8925, 1438, 55809, 5175, 8440, 6464, 219333, 5575, 26524, 25897, 55294, 23390, 57337, 10769, 10208, 255488, 103, 57630, 29115, 8835, 5522, 3685, 5468, 10188, 9945, 5602, 5603, 8915	135	4009	19414	1.50659	1	0.257009	0.255619
GOTERM_BP_ALL	GO:0036211~protein modification process	42	17.7966	0.00419069	7341, 5163, 22978, 5187, 7466, 5585, 1062, 6093, 23043, 54795, 90, 6469, 10891, 9759, 8925, 1438, 55809, 5175, 8440, 6464, 219333, 5575, 26524, 25897, 55294, 23390, 57337, 10769, 10208, 255488, 103, 57630, 29115, 8835, 5522, 3685, 5468, 10188, 9945, 5602, 5603, 8915	135	4010	19414	1.50621	1	0.257009	0.255619
GOTERM_BP_ALL	GO:0051716~cellular response to stimulus	71	30.0847	0.00419533	5187, 5585, 64599, 6236, 5664, 4773, 23523, 1015, 23043, 55841, 54795, 90, 1012, 10891, 6469, 50515, 91442, 9510, 55809, 8744, 6002, 26524, 55890, 57590, 55294, 23613, 288, 57630, 3685, 5468, 5623, 1948, 10188, 9945, 53836, 7341, 5163, 22856, 6452, 11083, 25806, 7466, 26137, 1284, 23026, 1040, 6093, 100505385, 8470, 57724, 28234, 9759, 11124, 57605, 1438, 5175, 8440, 6464, 5575, 112616, 1800, 233…	135	7887	19414	1.29458	1	0.257009	0.255619
GOTERM_BP_ALL	GO:0023052~signaling	63	26.6949	0.00421697	5187, 5585, 64599, 6236, 5664, 4773, 23523, 1015, 23043, 55841, 54795, 90, 1012, 6469, 50515, 9510, 55809, 8744, 6002, 26524, 55890, 57590, 55294, 288, 57630, 3685, 5468, 5623, 1948, 10188, 53836, 5163, 22856, 6452, 11083, 25806, 7466, 1284, 23026, 1040, 6093, 100505385, 8470, 57724, 9759, 11124, 57605, 1438, 5175, 8440, 6464, 5575, 25897, 112616, 23390, 10769, 103, 1288, 8835, 4313, 5602, 5603, …	135	6777	19414	1.33686	1	0.257009	0.255619
GOTERM_BP_ALL	GO:1903364~positive regulation of cellular protein catabolic process	6	2.54237	0.00433112	7341, 255488, 57630, 11124, 25897, 55294	135	154	19414	5.60289	1	0.257009	0.255619
GOTERM_BP_ALL	GO:0032774~RNA biosynthetic process	41	17.3729	0.00434118	7341, 11083, 25806, 5187, 7466, 5585, 4773, 26137, 1284, 1063, 338699, 54892, 116113, 58476, 55841, 90, 1012, 6469, 10891, 9759, 140612, 5558, 9819, 643615, 284371, 55809, 8022, 7574, 8440, 91661, 6464, 221937, 116931, 55294, 23613, 10208, 29115, 5468, 55659, 5602, 8915	135	3892	19414	1.51493	1	0.257009	0.255619
GOTERM_BP_ALL	GO:0065007~biological regulation	108	45.7627	0.00438956	6236, 5664, 161176, 1063, 1062, 338699, 23043, 55841, 90, 6469, 10891, 8925, 9510, 8022, 7574, 6002, 57590, 55294, 23613, 57630, 60481, 53836, 7341, 5163, 22856, 22978, 7466, 26137, 23026, 6093, 54892, 116113, 9759, 115072896, 5558, 3778, 7077, 5175, 8440, 91661, 5575, 23673, 1800, 23390, 10769, 8835, 5602, 5603, 51715, 5187, 347240, 5585, 64599, 4773, 26115, 9260, 23523, 1015, 58476, 54795, 1012…	135	13475	19414	1.15259	1	0.257009	0.255619
GOTERM_BP_ALL	GO:0098609~cell-cell adhesion	16	6.77966	0.00461621	5175, 8440, 6464, 8744, 1010, 6093, 288, 1015, 57630, 1012, 90, 3685, 6469, 1948, 3801, 8915	135	1021	19414	2.25359	1	0.265848	0.26441
GOTERM_BP_ALL	GO:0034330~cell junction organization	8	3.38983	0.00503402	5175, 100132463, 1015, 1012, 1010, 1948, 6093, 3801	135	302	19414	3.80947	1	0.285234	0.283691
GOTERM_BP_ALL	GO:0007167~enzyme linked receptor protein signaling pathway	16	6.77966	0.00513392	8440, 6464, 64599, 1284, 26524, 55294, 1288, 1012, 90, 8835, 6469, 4313, 5468, 10188, 1948, 50515	135	1033	19414	2.22741	1	0.286277	0.284729
GOTERM_BP_ALL	GO:1903828~negative regulation of cellular protein localization	6	2.54237	0.00535514	7341, 58476, 5468, 11124, 26524, 51715	135	162	19414	5.3262	1	0.293947	0.292357
GOTERM_BP_ALL	GO:0070887~cellular response to chemical stimulus	35	14.8305	0.00559039	7341, 5163, 5187, 7466, 5585, 26137, 1284, 57724, 28234, 54795, 90, 1012, 6469, 10891, 9759, 50515, 1438, 55809, 8440, 6464, 26524, 55294, 1800, 23390, 288, 103, 1288, 8835, 4313, 5468, 6339, 9945, 1948, 5603, 8915	135	3202	19414	1.57191	1	0.297547	0.295938
GOTERM_BP_ALL	GO:0006351~transcription, DNA-templated	39	16.5254	0.00575868	7341, 11083, 25806, 5187, 7466, 5585, 4773, 26137, 1284, 1063, 338699, 54892, 116113, 58476, 55841, 90, 1012, 6469, 10891, 9759, 140612, 9819, 643615, 284371, 55809, 8022, 7574, 8440, 91661, 6464, 221937, 116931, 55294, 23613, 10208, 5468, 55659, 5602, 8915	135	3703	19414	1.51458	1	0.297547	0.295938
GOTERM_BP_ALL	GO:0010604~positive regulation of macromolecule metabolic process	38	16.1017	0.00588595	7341, 5187, 7466, 5585, 4773, 1062, 6093, 58476, 23043, 90, 1012, 6469, 10891, 9759, 11124, 5558, 643615, 284371, 55809, 8022, 5175, 8440, 6464, 221937, 116931, 25897, 55294, 23613, 10769, 288, 255488, 103, 57630, 29115, 54505, 5468, 10188, 8915	135	3583	19414	1.52517	1	0.297547	0.295938
GOTERM_BP_ALL	GO:0051174~regulation of phosphorus metabolic process	23	9.74576	0.00589546	5163, 5175, 8440, 5187, 6464, 5585, 5575, 26137, 26524, 1062, 6093, 55294, 23390, 103, 57630, 23043, 90, 10891, 9759, 5468, 10188, 53836, 8915	135	1801	19414	1.83652	1	0.297547	0.295938
GOTERM_BP_ALL	GO:0030162~regulation of proteolysis	13	5.50847	0.00590938	7077, 7341, 25897, 6093, 55294, 1800, 255488, 57630, 28234, 6469, 5468, 115072896, 8915	135	752	19414	2.48603	1	0.297547	0.295938
GOTERM_BP_ALL	GO:0016310~phosphorylation	28	11.8644	0.00592892	5163, 5187, 5585, 26137, 1062, 6093, 23043, 90, 9759, 1438, 5175, 8440, 6464, 5575, 221937, 26524, 55294, 23390, 10769, 103, 57630, 8835, 3685, 5468, 10188, 5602, 5603, 8915	135	2375	19414	1.69541	1	0.297547	0.295938
GOTERM_BP_ALL	GO:0048523~negative regulation of cellular process	54	22.8814	0.00604224	5187, 5585, 347240, 5664, 4773, 1063, 55841, 54795, 90, 1012, 10891, 6469, 50514, 8925, 50515, 9510, 55809, 8022, 6002, 26524, 55294, 23613, 288, 57630, 3685, 5468, 1948, 53836, 7341, 22978, 25806, 7466, 26137, 23026, 6093, 100505385, 116113, 28234, 9759, 11124, 115072896, 7077, 8440, 6464, 5575, 221937, 56241, 1800, 10769, 255488, 103, 8835, 4313, 8915	135	5655	19414	1.37323	1	0.298636	0.297021
GOTERM_BP_ALL	GO:0046823~negative regulation of nucleocytoplasmic transport	4	1.69492	0.00616937	7341, 5468, 11124, 51715	135	54	19414	10.6524	1	0.298636	0.297021
GOTERM_BP_ALL	GO:0000902~cell morphogenesis	16	6.77966	0.00620565	25806, 8022, 26115, 1010, 161176, 26524, 23026, 6093, 23390, 288, 1015, 23043, 1012, 3685, 6469, 1948	135	1055	19414	2.18097	1	0.298636	0.297021
GOTERM_BP_ALL	GO:0048646~anatomical structure formation involved in morphogenesis	18	7.62712	0.00653734	9510, 6464, 4773, 9644, 1284, 26524, 6093, 55294, 10769, 1012, 90, 3685, 6469, 4313, 5468, 1948, 8925, 8915	135	1270	19414	2.03822	1	0.309295	0.307622
GOTERM_BP_ALL	GO:0033002~muscle cell proliferation	7	2.9661	0.00660322	9510, 1012, 6469, 10891, 9759, 4313, 5468	135	241	19414	4.17698	1	0.309295	0.307622
GOTERM_BP_ALL	GO:0097659~nucleic acid-templated transcription	40	16.9492	0.00678041	7341, 11083, 25806, 5187, 7466, 5585, 4773, 26137, 1284, 1063, 338699, 54892, 116113, 58476, 55841, 90, 1012, 6469, 10891, 9759, 140612, 9819, 643615, 284371, 55809, 8022, 7574, 8440, 91661, 6464, 221937, 116931, 55294, 23613, 10208, 29115, 5468, 55659, 5602, 8915	135	3865	19414	1.4883	1	0.313415	0.31172
GOTERM_BP_ALL	GO:0031325~positive regulation of cellular metabolic process	38	16.1017	0.00697057	7341, 5187, 7466, 5585, 4773, 26137, 1062, 6093, 58476, 23043, 90, 1012, 6469, 10891, 9759, 11124, 5558, 643615, 284371, 55809, 8022, 5175, 8440, 6464, 221937, 116931, 25897, 55294, 23613, 10769, 255488, 57630, 29115, 54505, 5468, 10188, 60481, 8915	135	3620	19414	1.50958	1	0.318021	0.316301
GOTERM_BP_ALL	GO:0048659~smooth muscle cell proliferation	6	2.54237	0.0073746	9510, 1012, 10891, 9759, 4313, 5468	135	175	19414	4.93054	1	0.329187	0.327406
GOTERM_BP_ALL	GO:0007275~multicellular organism development	53	22.4576	0.00740272	5585, 4773, 26115, 9260, 1063, 1015, 23043, 54795, 90, 1012, 10891, 6469, 8925, 50515, 9510, 8022, 8744, 26524, 55294, 23613, 288, 57630, 388697, 3685, 5468, 5623, 1948, 9509, 22856, 25806, 7466, 9644, 1284, 23026, 6093, 8470, 54892, 116113, 9759, 89796, 5175, 8440, 6464, 221937, 1010, 112616, 23390, 10769, 103, 8835, 4313, 51715, 8915	135	5575	19414	1.36714	1	0.329187	0.327406
GOTERM_BP_ALL	GO:1901800~positive regulation of proteasomal protein catabolic process	5	2.11864	0.00758995	7341, 255488, 57630, 25897, 55294	135	112	19414	6.41997	1	0.330153	0.328367
GOTERM_BP_ALL	GO:0043086~negative regulation of catalytic activity	12	5.08475	0.0076124	7077, 1800, 103, 5585, 57630, 5575, 28234, 5468, 26524, 115072896, 6093, 53836	135	681	19414	2.53405	1	0.330153	0.328367
GOTERM_BP_ALL	GO:0006928~movement of cell or subcellular component	27	11.4407	0.00778659	7341, 5585, 347240, 4773, 1062, 6093, 55841, 54795, 90, 1012, 6469, 9759, 89796, 9510, 8022, 5175, 8440, 55294, 23613, 1800, 10769, 57630, 3685, 4313, 5468, 1948, 3801	135	2307	19414	1.68305	1	0.333589	0.331785
GOTERM_BP_ALL	GO:0009653~anatomical structure morphogenesis	32	13.5593	0.00789977	22856, 25806, 5585, 4773, 9644, 26115, 161176, 1284, 23026, 6093, 1015, 23043, 90, 1012, 6469, 8925, 50515, 9510, 8022, 6464, 1010, 26524, 55294, 23390, 10769, 288, 3685, 4313, 5468, 1948, 51715, 8915	135	2907	19414	1.58302	1	0.33436	0.332552
GOTERM_BP_ALL	GO:0048660~regulation of smooth muscle cell proliferation	6	2.54237	0.00809005	9510, 1012, 10891, 9759, 4313, 5468	135	179	19414	4.82036	1	0.338338	0.336508
GOTERM_BP_ALL	GO:0009893~positive regulation of metabolic process	40	16.9492	0.00827764	7341, 5187, 7466, 5585, 4773, 26137, 1062, 6093, 58476, 23043, 90, 1012, 6469, 10891, 9759, 11124, 5558, 643615, 284371, 55809, 8022, 5175, 8440, 6464, 221937, 116931, 25897, 55294, 23613, 10769, 288, 255488, 103, 57630, 29115, 54505, 5468, 10188, 60481, 8915	135	3911	19414	1.4708	1	0.339711	0.337874
GOTERM_BP_ALL	GO:0042306~regulation of protein import into nucleus	5	2.11864	0.0083163	7341, 6469, 5468, 11124, 51715	135	115	19414	6.2525	1	0.339711	0.337874
GOTERM_BP_ALL	GO:0051270~regulation of cellular component movement	17	7.20339	0.00872589	7341, 9510, 5175, 5585, 6093, 55294, 23613, 1800, 10769, 54795, 1012, 90, 3685, 6469, 9759, 4313, 5468	135	1202	19414	2.03388	1	0.352345	0.35044
GOTERM_BP_ALL	GO:0009891~positive regulation of biosynthetic process	26	11.0169	0.0091904	5187, 5585, 4773, 26137, 58476, 90, 1012, 6469, 10891, 9759, 11124, 5558, 643615, 284371, 55809, 8022, 8440, 6464, 221937, 116931, 55294, 23613, 54505, 5468, 60481, 8915	135	2220	19414	1.68423	1	0.360244	0.358295
GOTERM_BP_ALL	GO:0016525~negative regulation of angiogenesis	6	2.54237	0.00925161	9510, 10769, 6464, 5468, 1284, 6093	135	185	19414	4.66402	1	0.360244	0.358295
GOTERM_BP_ALL	GO:1902680~positive regulation of RNA biosynthetic process	22	9.32203	0.00953189	284371, 55809, 8022, 8440, 5187, 6464, 5585, 221937, 4773, 116931, 55294, 23613, 58476, 1012, 90, 6469, 10891, 9759, 5468, 5558, 8915, 643615	135	1765	19414	1.7925	1	0.360244	0.358295
GOTERM_BP_ALL	GO:1903362~regulation of cellular protein catabolic process	7	2.9661	0.00958266	7341, 255488, 57630, 6469, 11124, 25897, 55294	135	261	19414	3.8569	1	0.360244	0.358295
GOTERM_BP_ALL	GO:0051247~positive regulation of protein metabolic process	22	9.32203	0.0095902	7341, 5175, 8440, 7466, 6464, 25897, 1062, 6093, 55294, 10769, 255488, 29115, 57630, 23043, 90, 54505, 10891, 9759, 5468, 11124, 10188, 8915	135	1766	19414	1.79149	1	0.360244	0.358295
GOTERM_BP_ALL	GO:1904589~regulation of protein import	5	2.11864	0.00962552	7341, 6469, 5468, 11124, 51715	135	120	19414	5.99198	1	0.360244	0.358295
GOTERM_BP_ALL	GO:0061136~regulation of proteasomal protein catabolic process	6	2.54237	0.00987348	7341, 255488, 57630, 6469, 25897, 55294	135	188	19414	4.5896	1	0.360244	0.358295
GOTERM_BP_ALL	GO:2000181~negative regulation of blood vessel morphogenesis	6	2.54237	0.00987348	9510, 10769, 6464, 5468, 1284, 6093	135	188	19414	4.5896	1	0.360244	0.358295
GOTERM_BP_ALL	GO:0034654~nucleobase-containing compound biosynthetic process	43	18.2203	0.0099343	7341, 11083, 25806, 5187, 7466, 5585, 4773, 26137, 1284, 1063, 338699, 54892, 116113, 58476, 55841, 90, 1012, 6469, 10891, 9759, 140612, 5558, 9819, 643615, 284371, 55809, 8022, 7574, 8440, 91661, 6464, 221937, 116931, 55294, 23613, 10208, 29115, 5468, 55659, 9945, 5602, 53836, 8915	135	4339	19414	1.42515	1	0.360244	0.358295
GOTERM_BP_ALL	GO:0044707~single-multicellular organism process	61	25.8475	0.00994695	5187, 5585, 4773, 26115, 9260, 1063, 338699, 1015, 58476, 23043, 55841, 54795, 90, 1012, 10891, 6469, 8925, 50515, 9510, 8022, 8744, 26524, 55294, 23613, 288, 57630, 388697, 3685, 5468, 5623, 1948, 9509, 22856, 25806, 7466, 9644, 26137, 1284, 23026, 6093, 8470, 54892, 116113, 9759, 89796, 3778, 5175, 8440, 6464, 5575, 221937, 1010, 112616, 23390, 10769, 103, 8835, 4313, 5603, 51715, 8915	135	6741	19414	1.30133	1	0.360244	0.358295
GOTERM_BP_ALL	GO:0065009~regulation of molecular function	30	12.7119	0.0104649	7341, 7466, 5585, 6236, 5664, 1062, 6093, 338699, 28234, 6469, 10891, 9759, 115072896, 5558, 119385, 7077, 8440, 6464, 5575, 26524, 55294, 1800, 288, 103, 57630, 3685, 5468, 5602, 53836, 8915	135	2722	19414	1.58495	1	0.367842	0.365852
GOTERM_BP_ALL	GO:0042752~regulation of circadian rhythm	5	2.11864	0.0104719	5187, 10891, 5468, 5602, 55294	135	123	19414	5.84583	1	0.367842	0.365852
GOTERM_BP_ALL	GO:0032270~positive regulation of cellular protein metabolic process	21	8.89831	0.01052	7341, 5175, 8440, 7466, 6464, 25897, 1062, 6093, 55294, 255488, 29115, 57630, 23043, 90, 54505, 10891, 9759, 5468, 11124, 10188, 8915	135	1668	19414	1.81052	1	0.367842	0.365852
GOTERM_BP_ALL	GO:0032502~developmental process	61	25.8475	0.0105756	5585, 4773, 26115, 161176, 9260, 23762, 1063, 1015, 58476, 23043, 55841, 54795, 90, 1012, 10891, 6469, 8925, 50515, 9510, 8022, 8744, 26524, 55294, 23613, 288, 57630, 388697, 3685, 5468, 5623, 1948, 10188, 9509, 7341, 22856, 25806, 7466, 9644, 1284, 23026, 1040, 6093, 8470, 54892, 116113, 9759, 89796, 5175, 8440, 6464, 221937, 1010, 112616, 23390, 10769, 103, 8835, 4313, 5602, 51715, 8915	135	6759	19414	1.29786	1	0.367842	0.365852
GOTERM_BP_ALL	GO:0030154~cell differentiation	44	18.6441	0.0106908	22856, 25806, 4773, 9644, 26115, 9260, 1284, 23762, 1063, 23026, 1040, 6093, 8470, 54892, 1015, 58476, 23043, 54795, 90, 6469, 10891, 9759, 89796, 8925, 50515, 8022, 5175, 8440, 8744, 221937, 26524, 112616, 55294, 23390, 288, 103, 57630, 388697, 8835, 3685, 4313, 5468, 10188, 1948	135	4487	19414	1.41019	1	0.368203	0.366211
GOTERM_BP_ALL	GO:0070663~regulation of leukocyte proliferation	7	2.9661	0.0113862	8440, 5585, 8744, 57630, 4773, 6469, 1438	135	271	19414	3.71458	1	0.383278	0.381205
GOTERM_BP_ALL	GO:0043412~macromolecule modification	42	17.7966	0.0114174	7341, 5163, 22978, 5187, 7466, 5585, 1062, 6093, 23043, 54795, 90, 6469, 10891, 9759, 8925, 1438, 55809, 5175, 8440, 6464, 219333, 5575, 26524, 25897, 55294, 23390, 57337, 10769, 10208, 255488, 103, 57630, 29115, 8835, 5522, 3685, 5468, 10188, 9945, 5602, 5603, 8915	135	4245	19414	1.42283	1	0.383278	0.381205
GOTERM_BP_ALL	GO:0019220~regulation of phosphate metabolic process	22	9.32203	0.0114791	5175, 8440, 5187, 6464, 5585, 5575, 26137, 26524, 1062, 6093, 55294, 23390, 103, 57630, 23043, 90, 10891, 9759, 5468, 10188, 53836, 8915	135	1796	19414	1.76156	1	0.383278	0.381205
GOTERM_BP_ALL	GO:0044767~single-organism developmental process	60	25.4237	0.0115649	5585, 4773, 26115, 161176, 9260, 23762, 1063, 1015, 58476, 23043, 55841, 54795, 90, 1012, 10891, 6469, 8925, 50515, 9510, 8022, 8744, 26524, 55294, 23613, 288, 57630, 388697, 3685, 5468, 5623, 1948, 10188, 9509, 22856, 25806, 7466, 9644, 1284, 23026, 1040, 6093, 8470, 54892, 116113, 9759, 89796, 5175, 8440, 6464, 221937, 1010, 112616, 23390, 10769, 103, 8835, 4313, 5602, 51715, 8915	135	6648	19414	1.2979	1	0.383278	0.381205
GOTERM_BP_ALL	GO:1901342~regulation of vasculature development	9	3.81356	0.0123132	9510, 10769, 6464, 4773, 5468, 1284, 1948, 6093, 55294	135	446	19414	2.90194	1	0.392415	0.390293
GOTERM_BP_ALL	GO:0010557~positive regulation of macromolecule biosynthetic process	24	10.1695	0.0123458	284371, 55809, 8022, 8440, 5187, 6464, 5585, 221937, 4773, 116931, 55294, 23613, 58476, 1012, 90, 6469, 54505, 10891, 9759, 5468, 11124, 5558, 8915, 643615	135	2040	19414	1.69185	1	0.392415	0.390293
GOTERM_BP_ALL	GO:0048513~animal organ development	38	16.1017	0.0123732	22856, 25806, 7466, 5585, 9644, 9260, 1063, 23026, 6093, 8470, 54892, 116113, 1015, 54795, 90, 6469, 10891, 9759, 8925, 50515, 9510, 8022, 5175, 6464, 8744, 221937, 26524, 112616, 55294, 103, 57630, 388697, 8835, 4313, 5468, 1948, 51715, 9509	135	3753	19414	1.45608	1	0.392415	0.390293
GOTERM_BP_ALL	GO:0072359~circulatory system development	17	7.20339	0.0123758	9510, 5175, 6464, 4773, 9260, 1284, 6093, 55294, 8470, 10769, 1012, 90, 3685, 6469, 4313, 5468, 1948	135	1250	19414	1.95578	1	0.392415	0.390293
GOTERM_BP_ALL	GO:1900180~regulation of protein localization to nucleus	6	2.54237	0.0123991	7341, 6469, 5468, 11124, 26524, 51715	135	199	19414	4.3359	1	0.392415	0.390293
GOTERM_BP_ALL	GO:0097190~apoptotic signaling pathway	11	4.66102	0.0126994	5163, 8440, 11083, 7466, 57630, 90, 3685, 6469, 11124, 55294, 8915	135	635	19414	2.49115	1	0.396301	0.394157
GOTERM_BP_ALL	GO:0034504~protein localization to nucleus	8	3.38983	0.0127475	7341, 103, 54971, 6469, 5468, 11124, 26524, 51715	135	361	19414	3.18687	1	0.396301	0.394157
GOTERM_BP_ALL	GO:1903052~positive regulation of proteolysis involved in cellular protein catabolic process	5	2.11864	0.01296	7341, 255488, 57630, 25897, 55294	135	131	19414	5.48883	1	0.399372	0.397212
GOTERM_BP_ALL	GO:0018130~heterocycle biosynthetic process	43	18.2203	0.0133134	7341, 11083, 25806, 5187, 7466, 5585, 4773, 26137, 1284, 1063, 338699, 54892, 116113, 58476, 55841, 90, 1012, 6469, 10891, 9759, 140612, 5558, 9819, 643615, 284371, 55809, 8022, 7574, 8440, 91661, 6464, 221937, 116931, 55294, 23613, 10208, 29115, 5468, 55659, 9945, 5602, 53836, 8915	135	4414	19414	1.40093	1	0.406695	0.404496
GOTERM_BP_ALL	GO:0032456~endocytic recycling	4	1.69492	0.013562	57724, 8675, 23673, 2060	135	72	19414	7.9893	1	0.410007	0.40779
GOTERM_BP_ALL	GO:0007169~transmembrane receptor protein tyrosine kinase signaling pathway	11	4.66102	0.0137585	8440, 6464, 64599, 1288, 1012, 8835, 4313, 1284, 1948, 10188, 55294	135	643	19414	2.46016	1	0.410007	0.40779
GOTERM_BP_ALL	GO:0031328~positive regulation of cellular biosynthetic process	25	10.5932	0.0137719	5187, 5585, 4773, 58476, 90, 1012, 6469, 10891, 9759, 11124, 5558, 643615, 284371, 55809, 8022, 8440, 6464, 221937, 116931, 55294, 23613, 54505, 5468, 60481, 8915	135	2178	19414	1.65068	1	0.410007	0.40779
GOTERM_BP_ALL	GO:0019438~aromatic compound biosynthetic process	43	18.2203	0.0139342	7341, 11083, 25806, 5187, 7466, 5585, 4773, 26137, 1284, 1063, 338699, 54892, 116113, 58476, 55841, 90, 1012, 6469, 10891, 9759, 140612, 5558, 9819, 643615, 284371, 55809, 8022, 7574, 8440, 91661, 6464, 221937, 116931, 55294, 23613, 10208, 29115, 5468, 55659, 9945, 5602, 53836, 8915	135	4426	19414	1.39713	1	0.411351	0.409126
GOTERM_BP_ALL	GO:0001655~urogenital system development	8	3.38983	0.0146168	9510, 5175, 7466, 90, 6469, 4313, 1063, 1948	135	371	19414	3.10097	1	0.413952	0.411713
GOTERM_BP_ALL	GO:0042221~response to chemical	45	19.0678	0.014717	7341, 5163, 5187, 7466, 5585, 4773, 26137, 1284, 1063, 6093, 57724, 23043, 28234, 54795, 90, 1012, 6469, 10891, 9759, 11124, 3778, 50515, 1438, 7077, 55809, 8022, 8440, 6464, 26524, 112616, 55294, 1800, 23390, 288, 103, 1288, 8835, 3685, 4313, 5468, 6339, 9945, 1948, 5603, 8915	135	4702	19414	1.37629	1	0.413952	0.411713
GOTERM_BP_ALL	GO:0033157~regulation of intracellular protein transport	7	2.9661	0.0149831	7341, 288, 6469, 5468, 11124, 51715, 55294	135	288	19414	3.49532	1	0.413952	0.411713
GOTERM_BP_ALL	GO:0006468~protein phosphorylation	23	9.74576	0.0150044	5163, 5175, 8440, 5187, 6464, 5585, 5575, 26524, 1062, 6093, 55294, 23390, 10769, 103, 57630, 23043, 90, 3685, 5468, 5602, 10188, 5603, 1438	135	1959	19414	1.6884	1	0.413952	0.411713
GOTERM_BP_ALL	GO:0034332~adherens junction organization	5	2.11864	0.0150541	1015, 1012, 1010, 1948, 6093	135	137	19414	5.24845	1	0.413952	0.411713
GOTERM_BP_ALL	GO:0032989~cellular component morphogenesis	16	6.77966	0.015106	25806, 8022, 26115, 1010, 161176, 26524, 23026, 6093, 23390, 288, 1015, 23043, 1012, 3685, 6469, 1948	135	1170	19414	1.9666	1	0.413952	0.411713
GOTERM_BP_ALL	GO:0051254~positive regulation of RNA metabolic process	22	9.32203	0.0151172	284371, 55809, 8022, 8440, 5187, 6464, 5585, 221937, 4773, 116931, 55294, 23613, 58476, 1012, 90, 6469, 10891, 9759, 5468, 5558, 8915, 643615	135	1844	19414	1.71571	1	0.413952	0.411713
GOTERM_BP_ALL	GO:0042325~regulation of phosphorylation	20	8.47458	0.01517	5175, 8440, 5187, 6464, 5585, 5575, 26137, 26524, 1062, 6093, 55294, 23390, 103, 57630, 23043, 90, 9759, 5468, 10188, 8915	135	1615	19414	1.7809	1	0.413952	0.411713
GOTERM_BP_ALL	GO:0030163~protein catabolic process	15	6.35593	0.0153758	7077, 7341, 7466, 219333, 25897, 6093, 55294, 10769, 255488, 58476, 57630, 54971, 6469, 4313, 11124	135	1065	19414	2.02546	1	0.413952	0.411713
GOTERM_BP_ALL	GO:0048870~cell motility	22	9.32203	0.0154577	9510, 5175, 8440, 5585, 4773, 6093, 55294, 23613, 1800, 10769, 57630, 55841, 54795, 1012, 90, 3685, 6469, 9759, 4313, 5468, 1948, 89796	135	1848	19414	1.71199	1	0.413952	0.411713
GOTERM_BP_ALL	GO:0051674~localization of cell	22	9.32203	0.0154577	9510, 5175, 8440, 5585, 4773, 6093, 55294, 23613, 1800, 10769, 57630, 55841, 54795, 1012, 90, 3685, 6469, 9759, 4313, 5468, 1948, 89796	135	1848	19414	1.71199	1	0.413952	0.411713
GOTERM_BP_ALL	GO:0040011~locomotion	24	10.1695	0.0155397	9510, 8022, 5175, 8440, 5585, 4773, 6093, 112616, 55294, 23613, 1800, 10769, 57630, 55841, 54795, 1012, 90, 3685, 6469, 9759, 4313, 5468, 1948, 89796	135	2083	19414	1.65693	1	0.413952	0.411713
GOTERM_BP_ALL	GO:0051090~regulation of sequence-specific DNA binding transcription factor activity	9	3.81356	0.0156594	7341, 7466, 6469, 10891, 9759, 5468, 5602, 338699, 8915	135	466	19414	2.7774	1	0.413952	0.411713
GOTERM_BP_ALL	GO:0090317~negative regulation of intracellular protein transport	4	1.69492	0.015672	7341, 5468, 11124, 51715	135	76	19414	7.56881	1	0.413952	0.411713
GOTERM_BP_ALL	GO:0040012~regulation of locomotion	16	6.77966	0.0162015	9510, 5175, 5585, 6093, 55294, 23613, 1800, 10769, 1012, 90, 3685, 6469, 9759, 4313, 5468, 1948	135	1180	19414	1.94993	1	0.424746	0.422448
GOTERM_BP_ALL	GO:0048856~anatomical structure development	56	23.7288	0.0163512	5585, 4773, 26115, 161176, 9260, 23762, 1063, 1015, 23043, 54795, 90, 1012, 10891, 6469, 8925, 50515, 9510, 8022, 8744, 26524, 55294, 23613, 288, 57630, 388697, 3685, 5468, 5623, 1948, 9509, 7341, 22856, 25806, 7466, 9644, 1284, 23026, 6093, 8470, 54892, 116113, 9759, 89796, 5175, 8440, 6464, 221937, 1010, 112616, 23390, 10769, 103, 8835, 4313, 51715, 8915	135	6205	19414	1.29786	1	0.425495	0.423194
GOTERM_BP_ALL	GO:0032434~regulation of proteasomal ubiquitin-dependent protein catabolic process	5	2.11864	0.0169538	7341, 255488, 57630, 6469, 25897	135	142	19414	5.06364	1	0.432765	0.430424
GOTERM_BP_ALL	GO:0045936~negative regulation of phosphate metabolic process	10	4.23729	0.0172701	8440, 5187, 103, 5585, 5575, 9759, 5468, 26524, 6093, 53836	135	569	19414	2.52737	1	0.432765	0.430424
GOTERM_BP_ALL	GO:0010563~negative regulation of phosphorus metabolic process	10	4.23729	0.0174474	8440, 5187, 103, 5585, 5575, 9759, 5468, 26524, 6093, 53836	135	570	19414	2.52294	1	0.432765	0.430424
GOTERM_BP_ALL	GO:0045893~positive regulation of transcription, DNA-templated	21	8.89831	0.0176541	284371, 55809, 8022, 8440, 5187, 6464, 5585, 221937, 4773, 116931, 55294, 23613, 58476, 1012, 90, 6469, 10891, 9759, 5468, 8915, 643615	135	1756	19414	1.71979	1	0.432765	0.430424
GOTERM_BP_ALL	GO:1903508~positive regulation of nucleic acid-templated transcription	21	8.89831	0.0176541	284371, 55809, 8022, 8440, 5187, 6464, 5585, 221937, 4773, 116931, 55294, 23613, 58476, 1012, 90, 6469, 10891, 9759, 5468, 8915, 643615	135	1756	19414	1.71979	1	0.432765	0.430424
GOTERM_BP_ALL	GO:0048468~cell development	26	11.0169	0.0176732	22856, 25806, 4773, 26115, 23762, 23026, 6093, 8470, 23043, 90, 6469, 9759, 8925, 50515, 8022, 5175, 8440, 26524, 55294, 23390, 288, 8835, 3685, 4313, 5468, 1948	135	2347	19414	1.59309	1	0.432765	0.430424
GOTERM_BP_ALL	GO:0006606~protein import into nucleus	6	2.54237	0.0177335	7341, 103, 6469, 5468, 11124, 51715	135	218	19414	3.958	1	0.432765	0.430424
GOTERM_BP_ALL	GO:1902593~single-organism nuclear import	6	2.54237	0.0177335	7341, 103, 6469, 5468, 11124, 51715	135	218	19414	3.958	1	0.432765	0.430424
GOTERM_BP_ALL	GO:0009628~response to abiotic stimulus	16	6.77966	0.0178376	7341, 5163, 5187, 5585, 5664, 1040, 55294, 9759, 4313, 5468, 6339, 5602, 5603, 3778, 9819, 8915	135	1194	19414	1.92707	1	0.432765	0.430424
GOTERM_BP_ALL	GO:0045935~positive regulation of nucleobase-containing compound metabolic process	24	10.1695	0.0178625	284371, 55809, 8022, 8440, 5187, 6464, 5585, 221937, 4773, 116931, 26137, 55294, 23613, 58476, 1012, 90, 6469, 10891, 9759, 5468, 11124, 5558, 8915, 643615	135	2110	19414	1.63572	1	0.432765	0.430424
GOTERM_BP_ALL	GO:0044744~protein targeting to nucleus	6	2.54237	0.0180503	7341, 103, 6469, 5468, 11124, 51715	135	219	19414	3.93993	1	0.43326	0.430917
GOTERM_BP_ALL	GO:0007176~regulation of epidermal growth factor-activated receptor activity	3	1.27119	0.0181296	8440, 6464, 55294	135	30	19414	14.3807	1	0.43326	0.430917
GOTERM_BP_ALL	GO:0080090~regulation of primary metabolic process	61	25.8475	0.018323	5187, 5585, 4773, 1063, 1062, 338699, 58476, 23043, 55841, 90, 1012, 10891, 6469, 9819, 643615, 284371, 55809, 7574, 8022, 26524, 55294, 23613, 57630, 29115, 3685, 5468, 55659, 10188, 60481, 53836, 7341, 5163, 25806, 7466, 26137, 6093, 116113, 54971, 28234, 9759, 140612, 11124, 5558, 115072896, 7077, 5175, 8440, 91661, 6464, 5575, 221937, 116931, 25897, 1800, 23390, 10769, 255488, 103, 54505, 560…	135	6928	19414	1.2662	1	0.434923	0.432571
GOTERM_BP_ALL	GO:0051246~regulation of protein metabolic process	35	14.8305	0.0187027	7341, 5187, 7466, 5585, 1062, 6093, 23043, 28234, 90, 54971, 6469, 10891, 9759, 11124, 115072896, 7077, 5175, 8440, 6464, 5575, 26524, 25897, 55294, 1800, 23390, 10769, 255488, 103, 57630, 29115, 3685, 54505, 5468, 10188, 8915	135	3474	19414	1.44884	1	0.436262	0.433902
GOTERM_BP_ALL	GO:0009895~negative regulation of catabolic process	7	2.9661	0.0187564	7077, 221937, 54971, 6469, 9759, 6093, 8925	135	303	19414	3.32228	1	0.436262	0.433902
GOTERM_BP_ALL	GO:0010876~lipid localization	9	3.81356	0.0187778	28234, 3685, 6469, 23673, 5468, 23762, 115072896, 57605, 55294	135	482	19414	2.6852	1	0.436262	0.433902
GOTERM_BP_ALL	GO:0019538~protein metabolic process	57	24.1525	0.0190424	5187, 5585, 5664, 1062, 79258, 58476, 23043, 54795, 90, 10891, 6469, 8925, 50515, 9510, 55809, 219333, 26524, 55294, 57630, 29115, 3685, 5468, 10188, 9945, 9509, 7341, 5163, 22856, 22978, 7466, 6093, 54971, 28234, 9759, 11124, 115072896, 1438, 7077, 5175, 8440, 6464, 5575, 25897, 1800, 23390, 57337, 10769, 10208, 255488, 103, 8835, 5522, 54505, 4313, 5602, 5603, 8915	135	6389	19414	1.28299	1	0.436262	0.433902
GOTERM_BP_ALL	GO:0042058~regulation of epidermal growth factor receptor signaling pathway	4	1.69492	0.0191645	8440, 6464, 1012, 55294	135	82	19414	7.015	1	0.436262	0.433902
GOTERM_BP_ALL	GO:1902806~regulation of cell cycle G1/S phase transition	6	2.54237	0.0193549	9510, 10769, 90, 56241, 23026, 55294	135	223	19414	3.86926	1	0.436262	0.433902
GOTERM_BP_ALL	GO:0051170~nuclear import	6	2.54237	0.0193549	7341, 103, 6469, 5468, 11124, 51715	135	223	19414	3.86926	1	0.436262	0.433902
GOTERM_BP_ALL	GO:0016202~regulation of striated muscle tissue development	5	2.11864	0.0194265	90, 6469, 9759, 1063, 1948	135	148	19414	4.85836	1	0.436262	0.433902
GOTERM_BP_ALL	GO:0070647~protein modification by small protein conjugation or removal	15	6.35593	0.019497	7341, 22978, 7466, 219333, 25897, 55294, 57337, 10208, 255488, 57630, 54795, 8835, 9759, 8925, 8915	135	1098	19414	1.96458	1	0.436262	0.433902
GOTERM_BP_ALL	GO:2001141~regulation of RNA biosynthetic process	37	15.678	0.0196856	7341, 25806, 5187, 7466, 5585, 4773, 26137, 1063, 338699, 116113, 58476, 55841, 90, 1012, 6469, 10891, 9759, 140612, 5558, 9819, 643615, 284371, 55809, 8022, 7574, 8440, 91661, 6464, 221937, 116931, 55294, 23613, 29115, 5468, 55659, 5602, 8915	135	3742	19414	1.42193	1	0.437694	0.435326
GOTERM_BP_ALL	GO:1903050~regulation of proteolysis involved in cellular protein catabolic process	6	2.54237	0.0200299	7341, 255488, 57630, 6469, 25897, 55294	135	225	19414	3.83486	1	0.440328	0.437946
GOTERM_BP_ALL	GO:0001667~ameboidal-type cell migration	9	3.81356	0.0200548	10769, 5585, 1012, 90, 6469, 5468, 1948, 6093, 55294	135	488	19414	2.65219	1	0.440328	0.437946
GOTERM_BP_ALL	GO:0034508~centromere complex assembly	3	1.27119	0.0204878	401541, 1063, 1062	135	32	19414	13.4819	1	0.444414	0.44201
GOTERM_BP_ALL	GO:0042326~negative regulation of phosphorylation	9	3.81356	0.0204939	8440, 5187, 103, 5585, 5575, 9759, 5468, 26524, 6093	135	490	19414	2.64136	1	0.444414	0.44201
GOTERM_BP_ALL	GO:0048634~regulation of muscle organ development	5	2.11864	0.021187	90, 6469, 9759, 1063, 1948	135	152	19414	4.73051	1	0.453841	0.451387
GOTERM_BP_ALL	GO:0045667~regulation of osteoblast differentiation	5	2.11864	0.021187	90, 54795, 9759, 9260, 5468	135	152	19414	4.73051	1	0.453841	0.451387
GOTERM_BP_ALL	GO:0045785~positive regulation of cell adhesion	9	3.81356	0.0213927	288, 8440, 8744, 1012, 3685, 6469, 1948, 6093, 8915	135	494	19414	2.61997	1	0.455469	0.453006
GOTERM_BP_ALL	GO:0071407~cellular response to organic cyclic compound	10	4.23729	0.0219029	55809, 5187, 57724, 103, 5585, 90, 54795, 4313, 5468, 6339	135	593	19414	2.42508	1	0.463524	0.461017
GOTERM_BP_ALL	GO:2000145~regulation of cell motility	15	6.35593	0.0223754	9510, 5175, 5585, 6093, 55294, 23613, 1800, 10769, 1012, 90, 3685, 6469, 9759, 4313, 5468	135	1118	19414	1.92944	1	0.46641	0.463888
GOTERM_BP_ALL	GO:1901184~regulation of ERBB signaling pathway	4	1.69492	0.0223774	8440, 6464, 1012, 55294	135	87	19414	6.61183	1	0.46641	0.463888
GOTERM_BP_ALL	GO:0018205~peptidyl-lysine modification	8	3.38983	0.0224376	7341, 57337, 10208, 5187, 54795, 6469, 10891, 9759	135	405	19414	2.84064	1	0.46641	0.463888
GOTERM_BP_ALL	GO:0010628~positive regulation of gene expression	25	10.5932	0.0228313	5187, 5585, 4773, 6093, 58476, 90, 1012, 6469, 10891, 9759, 643615, 284371, 55809, 8022, 8440, 6464, 221937, 116931, 55294, 23613, 288, 103, 54505, 5468, 8915	135	2280	19414	1.57684	1	0.471801	0.46925
GOTERM_BP_ALL	GO:0006970~response to osmotic stress	4	1.69492	0.023053	5585, 5603, 3778, 9819	135	88	19414	6.5367	1	0.473599	0.471037
GOTERM_BP_ALL	GO:0016575~histone deacetylation	4	1.69492	0.0237397	55809, 5187, 29115, 9759	135	89	19414	6.46325	1	0.482238	0.479629
GOTERM_BP_ALL	GO:1901362~organic cyclic compound biosynthetic process	43	18.2203	0.0237736	7341, 11083, 25806, 5187, 7466, 5585, 4773, 26137, 1284, 1063, 338699, 54892, 116113, 58476, 55841, 90, 1012, 6469, 10891, 9759, 140612, 5558, 9819, 643615, 284371, 55809, 8022, 7574, 8440, 91661, 6464, 221937, 116931, 55294, 23613, 10208, 29115, 5468, 55659, 9945, 5602, 53836, 8915	135	4574	19414	1.35193	1	0.482238	0.479629
GOTERM_BP_ALL	GO:0031399~regulation of protein modification process	22	9.32203	0.0238854	5175, 8440, 5187, 7466, 6464, 5585, 5575, 26524, 1062, 6093, 55294, 23390, 103, 29115, 57630, 23043, 90, 10891, 9759, 5468, 10188, 8915	135	1930	19414	1.63926	1	0.482238	0.479629
GOTERM_BP_ALL	GO:0051173~positive regulation of nitrogen compound metabolic process	25	10.5932	0.0244882	5187, 5585, 4773, 26137, 58476, 90, 1012, 6469, 10891, 9759, 11124, 5558, 643615, 284371, 55809, 8022, 8440, 6464, 221937, 116931, 55294, 23613, 54505, 5468, 8915	135	2295	19414	1.56653	1	0.490619	0.487966
GOTERM_BP_ALL	GO:0008285~negative regulation of cell proliferation	12	5.08475	0.0246791	9510, 8440, 5585, 1012, 6469, 10891, 9759, 5468, 23026, 1948, 50514, 55294	135	810	19414	2.13048	1	0.490619	0.487966
GOTERM_BP_ALL	GO:0008283~cell proliferation	23	9.74576	0.0247195	9510, 5163, 8440, 6464, 8744, 5585, 4773, 23026, 55294, 54892, 10208, 57630, 54795, 1012, 3685, 6469, 10891, 9759, 4313, 5468, 1948, 50514, 1438	135	2056	19414	1.60874	1	0.490619	0.487966
GOTERM_BP_ALL	GO:0030278~regulation of ossification	6	2.54237	0.025189	22856, 90, 54795, 9759, 9260, 5468	135	239	19414	3.61023	1	0.497129	0.49444
GOTERM_BP_ALL	GO:2001236~regulation of extrinsic apoptotic signaling pathway	5	2.11864	0.0255044	57630, 90, 3685, 11124, 8915	135	161	19414	4.46607	1	0.498775	0.496078
GOTERM_BP_ALL	GO:0042127~regulation of cell proliferation	21	8.89831	0.0255564	9510, 8440, 6464, 8744, 5585, 4773, 23026, 55294, 57630, 54795, 1012, 3685, 6469, 10891, 9759, 4313, 5468, 1948, 50514, 50515, 1438	135	1825	19414	1.65477	1	0.498775	0.496078
GOTERM_BP_ALL	GO:0051179~localization	59	25	0.0258429	5187, 5585, 6236, 5664, 4773, 26115, 161176, 9260, 23762, 1063, 1183, 1062, 1260, 1015, 58476, 23043, 55841, 54795, 90, 1012, 10891, 6469, 50515, 9510, 26524, 55294, 23613, 288, 57630, 3685, 5468, 1948, 10188, 7341, 7466, 8675, 6093, 57724, 54971, 28234, 9759, 11124, 115072896, 89796, 57605, 3778, 5175, 8440, 23673, 441432, 2060, 1800, 23390, 10769, 103, 8835, 4313, 6339, 51715	135	6764	19414	1.25438	1	0.50158	0.498867
GOTERM_BP_ALL	GO:0009967~positive regulation of signal transduction	20	8.47458	0.0261674	22856, 8440, 6464, 5575, 6093, 100505385, 57590, 55294, 23390, 10769, 57630, 23043, 54795, 1012, 90, 3685, 6469, 5468, 11124, 8915	135	1712	19414	1.67999	1	0.503829	0.501104
GOTERM_BP_ALL	GO:0007155~cell adhesion	19	8.05085	0.0262456	5175, 8440, 6464, 8744, 1010, 6093, 288, 100132463, 1015, 57630, 1288, 1012, 90, 3685, 6469, 4313, 1948, 3801, 8915	135	1596	19414	1.71199	1	0.503829	0.501104
GOTERM_BP_ALL	GO:0070665~positive regulation of leukocyte proliferation	5	2.11864	0.0270531	8440, 8744, 4773, 6469, 1438	135	164	19414	4.38437	1	0.506011	0.503274
GOTERM_BP_ALL	GO:0045892~negative regulation of transcription, DNA-templated	17	7.20339	0.0271338	7341, 55809, 25806, 8440, 5187, 7466, 6464, 221937, 4773, 26137, 1063, 23613, 116113, 55841, 6469, 9759, 5468	135	1372	19414	1.78187	1	0.506011	0.503274
GOTERM_BP_ALL	GO:0044267~cellular protein metabolic process	51	21.6102	0.0272065	5187, 5585, 5664, 1062, 58476, 23043, 54795, 90, 10891, 6469, 8925, 55809, 219333, 26524, 55294, 57630, 29115, 3685, 5468, 10188, 9945, 7341, 5163, 22978, 7466, 6093, 28234, 9759, 11124, 115072896, 1438, 7077, 5175, 8440, 6464, 5575, 25897, 1800, 23390, 57337, 10769, 10208, 255488, 103, 8835, 5522, 54505, 4313, 5602, 5603, 8915	135	5685	19414	1.29009	1	0.506011	0.503274
GOTERM_BP_ALL	GO:0022610~biological adhesion	19	8.05085	0.0272666	5175, 8440, 6464, 8744, 1010, 6093, 288, 100132463, 1015, 57630, 1288, 1012, 90, 3685, 6469, 4313, 1948, 3801, 8915	135	1603	19414	1.70452	1	0.506011	0.503274
GOTERM_BP_ALL	GO:0030279~negative regulation of ossification	4	1.69492	0.0273383	22856, 54795, 9759, 5468	135	94	19414	6.11946	1	0.506011	0.503274
GOTERM_BP_ALL	GO:0009953~dorsal/ventral pattern formation	4	1.69492	0.0273383	8022, 25806, 90, 6469	135	94	19414	6.11946	1	0.506011	0.503274
GOTERM_BP_ALL	GO:1903507~negative regulation of nucleic acid-templated transcription	17	7.20339	0.0274543	7341, 55809, 25806, 8440, 5187, 7466, 6464, 221937, 4773, 26137, 1063, 23613, 116113, 55841, 6469, 9759, 5468	135	1374	19414	1.77928	1	0.506011	0.503274
GOTERM_BP_ALL	GO:0031323~regulation of cellular metabolic process	61	25.8475	0.0275116	5187, 5585, 4773, 1063, 1062, 338699, 58476, 23043, 55841, 90, 1012, 10891, 6469, 9819, 8925, 643615, 284371, 55809, 7574, 8022, 26524, 55294, 23613, 57630, 29115, 3685, 5468, 55659, 10188, 60481, 53836, 7341, 5163, 25806, 7466, 26137, 6093, 116113, 28234, 9759, 140612, 11124, 5558, 115072896, 7077, 5175, 8440, 91661, 6464, 5575, 221937, 116931, 25897, 1800, 23390, 10769, 255488, 103, 54505, 5602…	135	7063	19414	1.242	1	0.506011	0.503274
GOTERM_BP_ALL	GO:2001233~regulation of apoptotic signaling pathway	8	3.38983	0.0278854	8440, 7466, 57630, 90, 3685, 11124, 55294, 8915	135	424	19414	2.71335	1	0.509135	0.506382
GOTERM_BP_ALL	GO:0032436~positive regulation of proteasomal ubiquitin-dependent protein catabolic process	4	1.69492	0.0280911	7341, 255488, 57630, 25897	135	95	19414	6.05505	1	0.509135	0.506382
GOTERM_BP_ALL	GO:0046822~regulation of nucleocytoplasmic transport	5	2.11864	0.0281162	7341, 6469, 5468, 11124, 51715	135	166	19414	4.33155	1	0.509135	0.506382
GOTERM_BP_ALL	GO:0071310~cellular response to organic substance	27	11.4407	0.0288595	5187, 7466, 5585, 26137, 1284, 57724, 54795, 90, 1012, 9759, 50515, 1438, 55809, 8440, 6464, 26524, 23390, 103, 1288, 8835, 4313, 5468, 6339, 9945, 1948, 5603, 8915	135	2577	19414	1.50671	1	0.516474	0.513681
GOTERM_BP_ALL	GO:0050670~regulation of lymphocyte proliferation	6	2.54237	0.0289184	8440, 5585, 8744, 57630, 4773, 6469	135	248	19414	3.47921	1	0.516474	0.513681
GOTERM_BP_ALL	GO:0032870~cellular response to hormone stimulus	10	4.23729	0.0293928	55809, 5187, 6464, 5585, 90, 8835, 9759, 5468, 6339, 26524	135	625	19414	2.30092	1	0.516474	0.513681
GOTERM_BP_ALL	GO:0071495~cellular response to endogenous stimulus	17	7.20339	0.0296077	55809, 5187, 6464, 5585, 1284, 26524, 1288, 54795, 1012, 90, 8835, 9759, 4313, 5468, 6339, 5603, 50515	135	1387	19414	1.7626	1	0.516474	0.513681
GOTERM_BP_ALL	GO:0007507~heart development	10	4.23729	0.0296526	9510, 6464, 90, 6469, 4313, 9260, 5468, 1948, 6093, 8470	135	626	19414	2.29724	1	0.516474	0.513681
GOTERM_BP_ALL	GO:0006355~regulation of transcription, DNA-templated	36	15.2542	0.0297228	7341, 25806, 5187, 7466, 5585, 4773, 26137, 1063, 338699, 116113, 58476, 55841, 90, 1012, 6469, 10891, 9759, 140612, 9819, 643615, 284371, 55809, 8022, 7574, 8440, 91661, 6464, 221937, 116931, 55294, 23613, 29115, 5468, 55659, 5602, 8915	135	3724	19414	1.39019	1	0.516474	0.513681
GOTERM_BP_ALL	GO:0048598~embryonic morphogenesis	10	4.23729	0.029914	25806, 90, 3685, 6469, 4313, 1284, 26524, 6093, 8915, 50515	135	627	19414	2.29358	1	0.516474	0.513681
GOTERM_BP_ALL	GO:1903506~regulation of nucleic acid-templated transcription	36	15.2542	0.030045	7341, 25806, 5187, 7466, 5585, 4773, 26137, 1063, 338699, 116113, 58476, 55841, 90, 1012, 6469, 10891, 9759, 140612, 9819, 643615, 284371, 55809, 8022, 7574, 8440, 91661, 6464, 221937, 116931, 55294, 23613, 29115, 5468, 55659, 5602, 8915	135	3727	19414	1.38907	1	0.516474	0.513681
GOTERM_BP_ALL	GO:0042593~glucose homeostasis	6	2.54237	0.0302353	7466, 221937, 54795, 26137, 10891, 5468	135	251	19414	3.43763	1	0.516474	0.513681
GOTERM_BP_ALL	GO:0003300~cardiac muscle hypertrophy	4	1.69492	0.030415	9759, 5468, 6093, 8470	135	98	19414	5.86969	1	0.516474	0.513681
GOTERM_BP_ALL	GO:1902679~negative regulation of RNA biosynthetic process	17	7.20339	0.0304688	7341, 55809, 25806, 8440, 5187, 7466, 6464, 221937, 4773, 26137, 1063, 23613, 116113, 55841, 6469, 9759, 5468	135	1392	19414	1.75627	1	0.516474	0.513681
GOTERM_BP_ALL	GO:0030334~regulation of cell migration	14	5.9322	0.0306042	9510, 5175, 6093, 55294, 23613, 1800, 10769, 1012, 90, 3685, 6469, 9759, 4313, 5468	135	1055	19414	1.90834	1	0.516474	0.513681
GOTERM_BP_ALL	GO:0033500~carbohydrate homeostasis	6	2.54237	0.0306825	7466, 221937, 54795, 26137, 10891, 5468	135	252	19414	3.42399	1	0.516474	0.513681
GOTERM_BP_ALL	GO:0032944~regulation of mononuclear cell proliferation	6	2.54237	0.0306825	8440, 5585, 8744, 57630, 4773, 6469	135	252	19414	3.42399	1	0.516474	0.513681
GOTERM_BP_ALL	GO:0045861~negative regulation of proteolysis	7	2.9661	0.0307268	7077, 1800, 57630, 28234, 6469, 115072896, 6093	135	340	19414	2.96074	1	0.516474	0.513681
GOTERM_BP_ALL	GO:0051093~negative regulation of developmental process	15	6.35593	0.0309675	9510, 6464, 4773, 1284, 6093, 55294, 10769, 55841, 54795, 8835, 3685, 6469, 9759, 5468, 1948	135	1168	19414	1.84684	1	0.518043	0.515241
GOTERM_BP_ALL	GO:0006869~lipid transport	8	3.38983	0.0314199	28234, 3685, 6469, 23673, 5468, 23762, 115072896, 57605	135	435	19414	2.64473	1	0.523119	0.52029
GOTERM_BP_ALL	GO:0009719~response to endogenous stimulus	20	8.47458	0.0318449	7077, 55809, 5187, 6464, 5585, 1284, 26524, 6093, 23043, 1288, 54795, 1012, 90, 8835, 9759, 4313, 5468, 6339, 5603, 50515	135	1750	19414	1.64351	1	0.524392	0.521556
GOTERM_BP_ALL	GO:0022603~regulation of anatomical structure morphogenesis	15	6.35593	0.0319442	9510, 6464, 5585, 4773, 26115, 161176, 1284, 6093, 55294, 10769, 23043, 90, 6469, 5468, 1948	135	1173	19414	1.83897	1	0.524392	0.521556
GOTERM_BP_ALL	GO:1901699~cellular response to nitrogen compound	11	4.66102	0.031946	1800, 57724, 103, 6464, 1288, 54795, 8835, 4313, 5468, 6339, 5603	135	738	19414	2.14347	1	0.524392	0.521556
GOTERM_BP_ALL	GO:1901987~regulation of cell cycle phase transition	8	3.38983	0.0320935	9510, 10769, 90, 56241, 23026, 1063, 1062, 55294	135	437	19414	2.63263	1	0.524392	0.521556
GOTERM_BP_ALL	GO:0034329~cell junction assembly	6	2.54237	0.032513	5175, 100132463, 1015, 1012, 1010, 6093	135	256	19414	3.37049	1	0.528787	0.525927
GOTERM_BP_ALL	GO:0014897~striated muscle hypertrophy	4	1.69492	0.0328373	9759, 5468, 6093, 8470	135	101	19414	5.69534	1	0.531601	0.528726
GOTERM_BP_ALL	GO:0051241~negative regulation of multicellular organismal process	17	7.20339	0.0331641	9510, 22856, 6464, 4773, 1284, 6093, 55294, 10769, 55841, 54795, 8835, 6469, 9759, 4313, 5468, 1948, 3778	135	1407	19414	1.73755	1	0.534429	0.531539
GOTERM_BP_ALL	GO:0050730~regulation of peptidyl-tyrosine phosphorylation	6	2.54237	0.0334533	5175, 8440, 6464, 90, 10188, 55294	135	258	19414	3.34436	1	0.536628	0.533725
GOTERM_BP_ALL	GO:0048661~positive regulation of smooth muscle cell proliferation	4	1.69492	0.0336665	9510, 1012, 9759, 4313	135	102	19414	5.63951	1	0.537593	0.534685
GOTERM_BP_ALL	GO:0045923~positive regulation of fatty acid metabolic process	3	1.27119	0.0340136	10891, 5468, 60481	135	42	19414	10.272	1	0.538072	0.535162
GOTERM_BP_ALL	GO:0035329~hippo signaling	3	1.27119	0.0340136	55841, 26524, 100505385	135	42	19414	10.272	1	0.538072	0.535162
GOTERM_BP_ALL	GO:0030155~regulation of cell adhesion	12	5.08475	0.034156	288, 8440, 8744, 57630, 1012, 3685, 6469, 4313, 11124, 1948, 6093, 8915	135	853	19414	2.02308	1	0.538072	0.535162
GOTERM_BP_ALL	GO:0044272~sulfur compound biosynthetic process	5	2.11864	0.0344061	22856, 5163, 27430, 60481, 50515	135	177	19414	4.06236	1	0.538762	0.535848
GOTERM_BP_ALL	GO:1902807~negative regulation of cell cycle G1/S phase transition	4	1.69492	0.0345065	10769, 90, 56241, 23026	135	103	19414	5.58475	1	0.538762	0.535848
GOTERM_BP_ALL	GO:0014896~muscle hypertrophy	4	1.69492	0.0353574	9759, 5468, 6093, 8470	135	104	19414	5.53105	1	0.547088	0.544129
GOTERM_BP_ALL	GO:0090257~regulation of muscle system process	6	2.54237	0.0353846	7341, 54795, 9759, 5468, 3778, 6093	135	262	19414	3.2933	1	0.547088	0.544129
GOTERM_BP_ALL	GO:1901698~response to nitrogen compound	14	5.9322	0.035507	5187, 6464, 6093, 1800, 57724, 103, 23043, 1288, 54795, 8835, 4313, 5468, 6339, 5603	135	1078	19414	1.86763	1	0.547088	0.544129
GOTERM_BP_ALL	GO:0048511~rhythmic process	7	2.9661	0.0363217	9510, 5187, 10891, 4313, 5468, 5602, 55294	135	354	19414	2.84365	1	0.555106	0.552103
GOTERM_BP_ALL	GO:0010033~response to organic substance	32	13.5593	0.0363434	5187, 7466, 5585, 26137, 1284, 6093, 57724, 23043, 54795, 90, 1012, 9759, 11124, 3778, 50515, 1438, 7077, 55809, 8440, 6464, 26524, 23390, 103, 1288, 8835, 4313, 5468, 6339, 9945, 1948, 5603, 8915	135	3265	19414	1.40944	1	0.555106	0.552103
GOTERM_BP_ALL	GO:0006914~autophagy	9	3.81356	0.0370592	10769, 57724, 58476, 221937, 23673, 6093, 51715, 8925, 55294	135	550	19414	2.35321	1	0.560436	0.557405
GOTERM_BP_ALL	GO:0031175~neuron projection development	13	5.50847	0.0371296	25806, 8022, 8440, 26115, 23026, 6093, 23390, 288, 23043, 6469, 4313, 1948, 8925	135	974	19414	1.9194	1	0.560436	0.557405
GOTERM_BP_ALL	GO:0070661~leukocyte proliferation	7	2.9661	0.037171	8440, 5585, 8744, 57630, 4773, 6469, 1438	135	356	19414	2.82767	1	0.560436	0.557405
GOTERM_BP_ALL	GO:0010647~positive regulation of cell communication	21	8.89831	0.0376734	22856, 8440, 6464, 5575, 6093, 100505385, 57590, 55294, 23390, 288, 10769, 57630, 23043, 54795, 1012, 90, 3685, 6469, 5468, 11124, 8915	135	1904	19414	1.58611	1	0.565584	0.562525
GOTERM_BP_ALL	GO:0009725~response to hormone	12	5.08475	0.0382678	7077, 55809, 5187, 6464, 5585, 90, 8835, 9759, 5468, 6339, 26524, 6093	135	869	19414	1.98583	1	0.572063	0.568969
GOTERM_BP_ALL	GO:0032268~regulation of cellular protein metabolic process	32	13.5593	0.0388053	7341, 5187, 7466, 5585, 1062, 6093, 23043, 28234, 90, 6469, 10891, 9759, 11124, 115072896, 7077, 5175, 8440, 6464, 5575, 26524, 25897, 55294, 1800, 23390, 255488, 103, 57630, 29115, 54505, 5468, 10188, 8915	135	3283	19414	1.40172	1	0.576141	0.573025
GOTERM_BP_ALL	GO:0032387~negative regulation of intracellular transport	4	1.69492	0.0388686	7341, 5468, 11124, 51715	135	108	19414	5.3262	1	0.576141	0.573025
GOTERM_BP_ALL	GO:0006509~membrane protein ectodomain proteolysis	3	1.27119	0.0401675	7077, 5664, 6093	135	46	19414	9.37874	1	0.592893	0.589686
GOTERM_BP_ALL	GO:0000904~cell morphogenesis involved in differentiation	11	4.66102	0.0404829	23390, 288, 8022, 25806, 23043, 26115, 3685, 6469, 26524, 1948, 6093	135	769	19414	2.05706	1	0.595047	0.591829
GOTERM_BP_ALL	GO:0019217~regulation of fatty acid metabolic process	4	1.69492	0.0406884	5163, 10891, 5468, 60481	135	110	19414	5.22936	1	0.595576	0.592355
GOTERM_BP_ALL	GO:0043161~proteasome-mediated ubiquitin-dependent protein catabolic process	8	3.38983	0.0417446	7341, 255488, 7466, 57630, 6469, 11124, 25897, 55294	135	463	19414	2.48479	1	0.606313	0.603034
GOTERM_BP_ALL	GO:0006984~ER-nucleus signaling pathway	3	1.27119	0.0417671	8440, 7466, 55294	135	47	19414	9.1792	1	0.606313	0.603034
GOTERM_BP_ALL	GO:0044770~cell cycle phase transition	9	3.81356	0.0423055	9510, 10769, 90, 56241, 26524, 23026, 1063, 1062, 55294	135	565	19414	2.29074	1	0.611602	0.608294
GOTERM_BP_ALL	GO:0051252~regulation of RNA metabolic process	37	15.678	0.0426002	7341, 25806, 5187, 7466, 5585, 4773, 26137, 1063, 338699, 116113, 58476, 55841, 90, 1012, 6469, 10891, 9759, 140612, 5558, 9819, 643615, 284371, 55809, 8022, 7574, 8440, 91661, 6464, 221937, 116931, 55294, 23613, 29115, 5468, 55659, 5602, 8915	135	3959	19414	1.34399	1	0.613338	0.610021
GOTERM_BP_ALL	GO:0044331~cell-cell adhesion mediated by cadherin	3	1.27119	0.0433903	1015, 1012, 1010	135	48	19414	8.98796	1	0.62038	0.617025
GOTERM_BP_ALL	GO:0010469~regulation of receptor activity	5	2.11864	0.043505	8440, 6464, 3685, 5468, 55294	135	191	19414	3.76459	1	0.62038	0.617025
GOTERM_BP_ALL	GO:0051091~positive regulation of sequence-specific DNA binding transcription factor activity	6	2.54237	0.0437917	6469, 10891, 9759, 5468, 338699, 8915	135	278	19414	3.10376	1	0.62038	0.617025
GOTERM_BP_ALL	GO:0007159~leukocyte cell-cell adhesion	8	3.38983	0.0437957	5175, 8440, 8744, 57630, 6469, 1948, 6093, 8915	135	468	19414	2.45825	1	0.62038	0.617025
GOTERM_BP_ALL	GO:0051253~negative regulation of RNA metabolic process	17	7.20339	0.0441094	7341, 55809, 25806, 8440, 5187, 7466, 6464, 221937, 4773, 26137, 1063, 23613, 116113, 55841, 6469, 9759, 5468	135	1460	19414	1.67447	1	0.622315	0.618949
GOTERM_BP_ALL	GO:0035987~endodermal cell differentiation	3	1.27119	0.0450368	3685, 4313, 1284	135	49	19414	8.80454	1	0.632857	0.629434
GOTERM_BP_ALL	GO:0045862~positive regulation of proteolysis	7	2.9661	0.0453906	7341, 255488, 57630, 5468, 25897, 55294, 8915	135	374	19414	2.69158	1	0.635288	0.631852
GOTERM_BP_ALL	GO:0010631~epithelial cell migration	7	2.9661	0.045878	10769, 5585, 1012, 5468, 1948, 6093, 55294	135	375	19414	2.6844	1	0.639561	0.636102
GOTERM_BP_ALL	GO:0006476~protein deacetylation	4	1.69492	0.0464017	55809, 5187, 29115, 9759	135	116	19414	4.95888	1	0.643445	0.639965
GOTERM_BP_ALL	GO:0044843~cell cycle G1/S phase transition	6	2.54237	0.0466452	9510, 10769, 90, 56241, 26524, 23026	135	283	19414	3.04892	1	0.643445	0.639965
GOTERM_BP_ALL	GO:0016339~calcium-dependent cell-cell adhesion via plasma membrane cell adhesion molecules	3	1.27119	0.0467061	1015, 1012, 1010	135	50	19414	8.62844	1	0.643445	0.639965
GOTERM_BP_ALL	GO:0009755~hormone-mediated signaling pathway	5	2.11864	0.0470526	55809, 5187, 5585, 5468, 26524	135	196	19414	3.66856	1	0.64452	0.641035
GOTERM_BP_ALL	GO:0001932~regulation of protein phosphorylation	17	7.20339	0.0471511	5175, 8440, 5187, 6464, 5585, 5575, 26524, 1062, 6093, 55294, 23390, 103, 57630, 23043, 90, 5468, 10188	135	1473	19414	1.65969	1	0.64452	0.641035
GOTERM_BP_ALL	GO:0090132~epithelium migration	7	2.9661	0.0473597	10769, 5585, 1012, 5468, 1948, 6093, 55294	135	378	19414	2.6631	1	0.644864	0.641376
GOTERM_BP_ALL	GO:0051239~regulation of multicellular organismal process	33	13.9831	0.0476926	7341, 22856, 5187, 4773, 26115, 26137, 9260, 1284, 1063, 6093, 338699, 23043, 55841, 54795, 90, 6469, 9759, 3778, 9510, 6464, 8744, 5575, 26524, 55294, 10769, 57630, 8835, 3685, 4313, 5468, 1948, 5603, 8915	135	3471	19414	1.36723	1	0.646888	0.643389
GOTERM_BP_ALL	GO:0048641~regulation of skeletal muscle tissue development	3	1.27119	0.0483978	90, 6469, 9759	135	51	19414	8.45926	1	0.650333	0.646816
GOTERM_BP_ALL	GO:0071559~response to transforming growth factor beta	6	2.54237	0.0484093	90, 5468, 1284, 26524, 6093, 50515	135	286	19414	3.01694	1	0.650333	0.646816
GOTERM_BP_ALL	GO:0000122~negative regulation of transcription from RNA polymerase II promoter	13	5.50847	0.0485019	25806, 8440, 5187, 7466, 221937, 4773, 26137, 23613, 116113, 55841, 6469, 9759, 5468	135	1016	19414	1.84006	1	0.650333	0.646816
GOTERM_BP_ALL	GO:0008284~positive regulation of cell proliferation	13	5.50847	0.0487991	9510, 8440, 6464, 8744, 4773, 54795, 1012, 3685, 6469, 9759, 4313, 1948, 1438	135	1017	19414	1.83825	1	0.651829	0.648304
GOTERM_BP_ALL	GO:0090130~tissue migration	7	2.9661	0.0504118	10769, 5585, 1012, 5468, 1948, 6093, 55294	135	384	19414	2.62149	1	0.670334	0.666709
GOTERM_BP_ALL	GO:0019222~regulation of metabolic process	63	26.6949	0.0506272	5187, 5585, 4773, 1063, 1062, 338699, 58476, 23043, 55841, 90, 1012, 10891, 6469, 9819, 8925, 643615, 284371, 55809, 7574, 8022, 26524, 55294, 23613, 288, 57630, 29115, 3685, 5468, 55659, 10188, 60481, 53836, 7341, 5163, 25806, 7466, 26137, 6093, 116113, 54971, 28234, 9759, 140612, 11124, 5558, 115072896, 7077, 5175, 8440, 91661, 6464, 5575, 221937, 116931, 25897, 1800, 23390, 10769, 255488, 103,…	135	7567	19414	1.19729	1	0.670334	0.666709
GOTERM_BP_ALL	GO:0006109~regulation of carbohydrate metabolic process	5	2.11864	0.0507569	5163, 221937, 26137, 10891, 9759	135	201	19414	3.5773	1	0.670334	0.666709
GOTERM_BP_ALL	GO:0051153~regulation of striated muscle cell differentiation	4	1.69492	0.0514493	4773, 6469, 9759, 1948	135	121	19414	4.75396	1	0.675015	0.671364
GOTERM_BP_ALL	GO:0006996~organelle organization	40	16.9492	0.0514956	7341, 5187, 5585, 347240, 8675, 161176, 9260, 1063, 1183, 1062, 6093, 100505385, 23523, 8470, 54892, 57724, 58476, 23043, 54971, 6469, 10891, 9759, 89796, 55809, 8440, 6464, 23673, 401541, 25897, 55294, 2060, 23613, 10769, 288, 10208, 29115, 54505, 5468, 51715, 3801	135	4416	19414	1.3026	1	0.675015	0.671364
GOTERM_BP_ALL	GO:0048013~ephrin receptor signaling pathway	3	1.27119	0.0518472	8440, 4313, 1948	135	53	19414	8.14004	1	0.677097	0.673435
GOTERM_BP_ALL	GO:0017038~protein import	6	2.54237	0.0520552	7341, 103, 6469, 5468, 11124, 51715	135	292	19414	2.95495	1	0.677296	0.673633
GOTERM_BP_ALL	GO:0060255~regulation of macromolecule metabolic process	59	25	0.052278	5187, 5585, 4773, 1063, 1062, 338699, 58476, 23043, 55841, 90, 1012, 10891, 6469, 9819, 643615, 284371, 55809, 7574, 8022, 26524, 55294, 23613, 288, 57630, 29115, 3685, 5468, 55659, 10188, 7341, 25806, 7466, 26137, 6093, 116113, 54971, 28234, 9759, 140612, 11124, 5558, 115072896, 7077, 5175, 8440, 91661, 6464, 5575, 221937, 116931, 25897, 1800, 23390, 10769, 255488, 103, 54505, 5602, 8915	135	7018	19414	1.20898	1	0.677685	0.67402
GOTERM_BP_ALL	GO:0050790~regulation of catalytic activity	21	8.89831	0.0527277	7077, 7341, 8440, 6464, 5585, 5575, 5664, 26524, 1062, 6093, 55294, 1800, 103, 57630, 28234, 5468, 5558, 115072896, 119385, 53836, 8915	135	1979	19414	1.526	1	0.678878	0.675206
GOTERM_BP_ALL	GO:0030030~cell projection organization	18	7.62712	0.0527793	25806, 8022, 8440, 347240, 26115, 23026, 1183, 6093, 23390, 288, 23043, 1012, 6469, 9759, 4313, 1948, 51715, 8925	135	1615	19414	1.60281	1	0.678878	0.675206
GOTERM_BP_ALL	GO:1903827~regulation of cellular protein localization	9	3.81356	0.0529498	7341, 288, 58476, 6469, 5468, 11124, 26524, 51715, 55294	135	592	19414	2.18626	1	0.678878	0.675206
GOTERM_BP_ALL	GO:0007249~I-kappaB kinase/NF-kappaB signaling	6	2.54237	0.0533054	23390, 10769, 5187, 11124, 6093, 8915	135	294	19414	2.93485	1	0.680952	0.677269
GOTERM_BP_ALL	GO:0031324~negative regulation of cellular metabolic process	31	13.1356	0.0535373	7341, 25806, 5187, 7466, 5585, 4773, 26137, 1063, 6093, 116113, 55841, 28234, 6469, 9759, 115072896, 8925, 7077, 55809, 8440, 6464, 5575, 221937, 26524, 55294, 23613, 1800, 103, 57630, 3685, 5468, 53836	135	3246	19414	1.37339	1	0.681436	0.677751
GOTERM_BP_ALL	GO:0051045~negative regulation of membrane protein ectodomain proteolysis	2	0.847458	0.0539117	7077, 6093	135	8	19414	35.9519	1	0.681585	0.677899
GOTERM_BP_ALL	GO:0018108~peptidyl-tyrosine phosphorylation	6	2.54237	0.053937	5175, 8440, 6464, 90, 10188, 55294	135	295	19414	2.9249	1	0.681585	0.677899
GOTERM_BP_ALL	GO:0031401~positive regulation of protein modification process	15	6.35593	0.0547565	5175, 7466, 6464, 1062, 6093, 55294, 29115, 57630, 23043, 90, 10891, 9759, 5468, 10188, 8915	135	1267	19414	1.70253	1	0.689461	0.685732
GOTERM_BP_ALL	GO:0010883~regulation of lipid storage	3	1.27119	0.0553818	3685, 5468, 55294	135	55	19414	7.84404	1	0.692608	0.688862
GOTERM_BP_ALL	GO:0045934~negative regulation of nucleobase-containing compound metabolic process	18	7.62712	0.0555783	7341, 55809, 25806, 8440, 5187, 7466, 6464, 221937, 4773, 26137, 1063, 23613, 116113, 55841, 6469, 9759, 5468, 53836	135	1626	19414	1.59196	1	0.692608	0.688862
GOTERM_BP_ALL	GO:0006511~ubiquitin-dependent protein catabolic process	10	4.23729	0.0555979	7341, 255488, 7466, 58476, 57630, 219333, 6469, 11124, 25897, 55294	135	705	19414	2.03982	1	0.692608	0.688862
GOTERM_BP_ALL	GO:0018212~peptidyl-tyrosine modification	6	2.54237	0.055858	5175, 8440, 6464, 90, 10188, 55294	135	298	19414	2.89545	1	0.69339	0.68964
GOTERM_BP_ALL	GO:0035601~protein deacylation	4	1.69492	0.0578429	55809, 5187, 29115, 9759	135	127	19414	4.52937	1	0.7155	0.71163
GOTERM_BP_ALL	GO:0009056~catabolic process	26	11.0169	0.0582438	7341, 22978, 7466, 26137, 6093, 57724, 58476, 28234, 54971, 6469, 9759, 11124, 8925, 7077, 219333, 221937, 23673, 25897, 55294, 1800, 10769, 255488, 57630, 4313, 51715, 9509	135	2629	19414	1.42221	1	0.715809	0.711937
GOTERM_BP_ALL	GO:0044260~cellular macromolecule metabolic process	79	33.4746	0.0582754	5187, 5585, 5664, 4773, 1063, 1062, 338699, 58476, 23043, 55841, 54795, 90, 1012, 10891, 6469, 9819, 8925, 643615, 50515, 91442, 284371, 55809, 7574, 8022, 219333, 26524, 55294, 100113393, 23613, 57630, 29115, 3685, 5468, 55659, 10188, 9945, 7341, 5163, 22856, 22978, 11083, 25806, 7466, 26137, 1284, 6093, 54892, 116113, 28234, 9759, 140612, 11124, 5558, 115072896, 1438, 7077, 5175, 8440, 91661, 6…	135	9919	19414	1.14536	1	0.715809	0.711937
GOTERM_BP_ALL	GO:0006469~negative regulation of protein kinase activity	5	2.11864	0.0586324	103, 5585, 5575, 5468, 26524	135	211	19414	3.40776	1	0.717172	0.713293
GOTERM_BP_ALL	GO:0098732~macromolecule deacylation	4	1.69492	0.0589434	55809, 5187, 29115, 9759	135	128	19414	4.49398	1	0.717172	0.713293
GOTERM_BP_ALL	GO:0060612~adipose tissue development	3	1.27119	0.0589987	54795, 10891, 5468	135	57	19414	7.56881	1	0.717172	0.713293
GOTERM_BP_ALL	GO:0019941~modification-dependent protein catabolic process	10	4.23729	0.0596907	7341, 255488, 7466, 58476, 57630, 219333, 6469, 11124, 25897, 55294	135	715	19414	2.01129	1	0.720595	0.716698
GOTERM_BP_ALL	GO:0010942~positive regulation of cell death	10	4.23729	0.0596907	8440, 9759, 4313, 5468, 11124, 26524, 1948, 3778, 55294, 8915	135	715	19414	2.01129	1	0.720595	0.716698
GOTERM_BP_ALL	GO:0048259~regulation of receptor-mediated endocytosis	4	1.69492	0.060026	3685, 5468, 10188, 6093	135	129	19414	4.45914	1	0.72203	0.718125
GOTERM_BP_ALL	GO:0000082~G1/S transition of mitotic cell cycle	5	2.11864	0.0602817	9510, 10769, 90, 26524, 23026	135	213	19414	3.37576	1	0.72203	0.718125
GOTERM_BP_ALL	GO:0051146~striated muscle cell differentiation	6	2.54237	0.0604931	4773, 90, 6469, 9759, 1948, 8470	135	305	19414	2.829	1	0.72203	0.718125
GOTERM_BP_ALL	GO:0010648~negative regulation of cell communication	17	7.20339	0.0608193	8440, 5187, 7466, 6002, 26524, 55294, 10769, 103, 57630, 55841, 90, 8835, 3685, 6469, 5468, 11124, 50515	135	1525	19414	1.6031	1	0.72203	0.718125
GOTERM_BP_ALL	GO:0001706~endoderm formation	3	1.27119	0.0608372	3685, 4313, 1284	135	58	19414	7.43831	1	0.72203	0.718125
GOTERM_BP_ALL	GO:0001704~formation of primary germ layer	4	1.69492	0.0611735	90, 3685, 4313, 1284	135	130	19414	4.42484	1	0.723578	0.719665
GOTERM_BP_ALL	GO:0010498~proteasomal protein catabolic process	8	3.38983	0.0615181	7341, 255488, 7466, 57630, 6469, 11124, 25897, 55294	135	506	19414	2.27363	1	0.725211	0.721289
GOTERM_BP_ALL	GO:0032446~protein modification by small protein conjugation	12	5.08475	0.0618258	7341, 22978, 255488, 7466, 57630, 54795, 8835, 9759, 25897, 8925, 55294, 8915	135	943	19414	1.83	1	0.726392	0.722463
GOTERM_BP_ALL	GO:0045765~regulation of angiogenesis	7	2.9661	0.0620318	9510, 10769, 6464, 5468, 1284, 6093, 55294	135	405	19414	2.48556	1	0.726392	0.722463
GOTERM_BP_ALL	GO:0023057~negative regulation of signaling	17	7.20339	0.0622644	8440, 5187, 7466, 6002, 26524, 55294, 10769, 103, 57630, 55841, 90, 8835, 3685, 6469, 5468, 11124, 50515	135	1530	19414	1.59786	1	0.726694	0.722764
GOTERM_BP_ALL	GO:0034645~cellular macromolecule biosynthetic process	49	20.7627	0.0629838	5187, 5585, 4773, 1063, 338699, 58476, 55841, 90, 1012, 10891, 6469, 9819, 643615, 50515, 284371, 55809, 7574, 8022, 55294, 23613, 29115, 5468, 55659, 9945, 7341, 22856, 11083, 25806, 7466, 26137, 1284, 6093, 54892, 116113, 9759, 140612, 11124, 5558, 8440, 91661, 6464, 221937, 116931, 23390, 10208, 103, 54505, 5602, 8915	135	5705	19414	1.23516	1	0.73023	0.72628
GOTERM_BP_ALL	GO:0015850~organic hydroxy compound transport	6	2.54237	0.0632375	28234, 6469, 23673, 5468, 23762, 441432	135	309	19414	2.79238	1	0.73023	0.72628
GOTERM_BP_ALL	GO:0009968~negative regulation of signal transduction	16	6.77966	0.0640179	8440, 5187, 7466, 6002, 26524, 55294, 103, 57630, 55841, 90, 8835, 3685, 6469, 5468, 11124, 50515	135	1416	19414	1.62494	1	0.73023	0.72628
GOTERM_BP_ALL	GO:0023014~signal transduction by protein phosphorylation	11	4.66102	0.0640312	23390, 5187, 6464, 57630, 23043, 3685, 5468, 5602, 5603, 6093, 55294	135	836	19414	1.8922	1	0.73023	0.72628
GOTERM_BP_ALL	GO:0000165~MAPK cascade	11	4.66102	0.0640312	23390, 5187, 6464, 57630, 23043, 3685, 5468, 5602, 5603, 6093, 55294	135	836	19414	1.8922	1	0.73023	0.72628
GOTERM_BP_ALL	GO:0038127~ERBB signaling pathway	4	1.69492	0.0645933	8440, 6464, 1012, 55294	135	133	19414	4.32503	1	0.73023	0.72628
GOTERM_BP_ALL	GO:0034599~cellular response to oxidative stress	6	2.54237	0.0646358	1800, 5163, 10891, 4313, 5603, 55294	135	311	19414	2.77442	1	0.73023	0.72628
GOTERM_BP_ALL	GO:0043632~modification-dependent macromolecule catabolic process	10	4.23729	0.0648533	7341, 255488, 7466, 58476, 57630, 219333, 6469, 11124, 25897, 55294	135	727	19414	1.97809	1	0.73023	0.72628
GOTERM_BP_ALL	GO:0019219~regulation of nucleobase-containing compound metabolic process	39	16.5254	0.0649053	7341, 25806, 5187, 7466, 5585, 4773, 26137, 1063, 338699, 116113, 58476, 55841, 90, 1012, 6469, 10891, 9759, 140612, 11124, 5558, 9819, 643615, 284371, 55809, 8022, 7574, 8440, 91661, 6464, 221937, 116931, 55294, 23613, 29115, 5468, 55659, 5602, 53836, 8915	135	4361	19414	1.28606	1	0.73023	0.72628
GOTERM_BP_ALL	GO:0032386~regulation of intracellular transport	8	3.38983	0.0652015	7341, 288, 6469, 5468, 11124, 6093, 51715, 55294	135	513	19414	2.24261	1	0.73023	0.72628
GOTERM_BP_ALL	GO:0031326~regulation of cellular biosynthetic process	44	18.6441	0.0657224	7341, 5163, 25806, 5187, 7466, 5585, 4773, 26137, 1063, 6093, 338699, 116113, 58476, 55841, 90, 1012, 6469, 10891, 9759, 140612, 11124, 5558, 9819, 643615, 284371, 55809, 8022, 7574, 8440, 91661, 6464, 221937, 116931, 55294, 23613, 103, 29115, 54505, 5468, 55659, 5602, 60481, 53836, 8915	135	5039	19414	1.25571	1	0.73023	0.72628
GOTERM_BP_ALL	GO:0006898~receptor-mediated endocytosis	6	2.54237	0.0660515	3685, 9260, 5468, 10188, 6093, 2060	135	313	19414	2.75669	1	0.73023	0.72628
GOTERM_BP_ALL	GO:0023056~positive regulation of signaling	20	8.47458	0.066227	22856, 8440, 6464, 5575, 6093, 100505385, 57590, 55294, 23390, 10769, 57630, 23043, 54795, 1012, 90, 3685, 6469, 5468, 11124, 8915	135	1910	19414	1.50584	1	0.73023	0.72628
GOTERM_BP_ALL	GO:0071383~cellular response to steroid hormone stimulus	5	2.11864	0.0662472	55809, 5187, 5585, 90, 6339	135	220	19414	3.26835	1	0.73023	0.72628
GOTERM_BP_ALL	GO:0032501~multicellular organismal process	66	27.9661	0.0663989	5187, 5585, 4773, 26115, 9260, 23762, 1063, 1260, 338699, 1015, 58476, 23043, 55841, 54795, 90, 1012, 10891, 6469, 8925, 50515, 9510, 8022, 8744, 26524, 55294, 23613, 288, 57630, 388697, 3685, 5468, 5623, 1948, 3801, 9509, 7341, 22856, 25806, 7466, 9644, 26137, 1284, 23026, 6093, 8470, 54892, 116113, 9759, 89796, 3778, 5175, 8440, 6464, 5575, 221937, 1010, 112616, 23390, 10769, 103, 8835, 4313, 6…	135	8102	19414	1.17147	1	0.73023	0.72628
GOTERM_BP_ALL	GO:0070830~bicellular tight junction assembly	3	1.27119	0.066468	5175, 100132463, 6093	135	61	19414	7.0725	1	0.73023	0.72628
GOTERM_BP_ALL	GO:0033619~membrane protein proteolysis	3	1.27119	0.066468	7077, 5664, 6093	135	61	19414	7.0725	1	0.73023	0.72628
GOTERM_BP_ALL	GO:1904181~positive regulation of membrane depolarization	2	0.847458	0.0669325	288, 54795	135	10	19414	28.7615	1	0.73023	0.72628
GOTERM_BP_ALL	GO:0001542~ovulation from ovarian follicle	2	0.847458	0.0669325	9510, 4313	135	10	19414	28.7615	1	0.73023	0.72628
GOTERM_BP_ALL	GO:0016926~protein desumoylation	2	0.847458	0.0669325	57337, 10208	135	10	19414	28.7615	1	0.73023	0.72628
GOTERM_BP_ALL	GO:1904179~positive regulation of adipose tissue development	2	0.847458	0.0669325	54795, 5468	135	10	19414	28.7615	1	0.73023	0.72628
GOTERM_BP_ALL	GO:0045944~positive regulation of transcription from RNA polymerase II promoter	15	6.35593	0.0675802	284371, 55809, 8022, 8440, 5187, 4773, 116931, 55294, 23613, 1012, 90, 6469, 10891, 9759, 5468	135	1308	19414	1.64917	1	0.735013	0.731038
GOTERM_BP_ALL	GO:0002521~leukocyte differentiation	9	3.81356	0.0701379	1015, 8744, 57630, 9644, 6469, 9759, 5468, 112616, 55294	135	629	19414	2.05766	1	0.75634	0.75225
GOTERM_BP_ALL	GO:0045668~negative regulation of osteoblast differentiation	3	1.27119	0.0703147	54795, 9759, 5468	135	63	19414	6.84797	1	0.75634	0.75225
GOTERM_BP_ALL	GO:0042177~negative regulation of protein catabolic process	4	1.69492	0.0703903	7077, 54971, 6469, 6093	135	138	19414	4.16833	1	0.75634	0.75225
GOTERM_BP_ALL	GO:0001822~kidney development	6	2.54237	0.0704023	9510, 5175, 7466, 6469, 1063, 1948	135	319	19414	2.70484	1	0.75634	0.75225
GOTERM_BP_ALL	GO:0071396~cellular response to lipid	9	3.81356	0.070645	55809, 5187, 5585, 90, 4313, 5468, 6339, 1948, 8915	135	630	19414	2.05439	1	0.756634	0.752542
GOTERM_BP_ALL	GO:0031330~negative regulation of cellular catabolic process	5	2.11864	0.0715967	7077, 221937, 6469, 6093, 8925	135	226	19414	3.18158	1	0.764497	0.760362
GOTERM_BP_ALL	GO:0046651~lymphocyte proliferation	6	2.54237	0.0718871	8440, 5585, 8744, 57630, 4773, 6469	135	321	19414	2.68799	1	0.765271	0.761132
GOTERM_BP_ALL	GO:0051272~positive regulation of cellular component movement	9	3.81356	0.07218	9510, 10769, 5175, 1012, 90, 54795, 3685, 9759, 4313	135	633	19414	2.04466	1	0.766067	0.761924
GOTERM_BP_ALL	GO:0050821~protein stabilization	5	2.11864	0.0725093	7341, 7466, 10891, 23673, 55294	135	227	19414	3.16756	1	0.767245	0.763095
GOTERM_BP_ALL	GO:0038063~collagen-activated tyrosine kinase receptor signaling pathway	2	0.847458	0.0733761	1288, 1284	135	11	19414	26.1468	1	0.771623	0.76745
GOTERM_BP_ALL	GO:0043170~macromolecule metabolic process	84	35.5932	0.0737554	5187, 5585, 5664, 4773, 1063, 1062, 338699, 79258, 58476, 23043, 55841, 54795, 90, 1012, 10891, 6469, 9819, 8925, 643615, 50515, 91442, 284371, 9510, 55809, 7574, 8022, 219333, 26524, 55294, 100113393, 23613, 288, 57630, 29115, 3685, 5468, 55659, 10188, 9945, 9509, 7341, 5163, 22856, 22978, 11083, 25806, 7466, 26137, 1284, 6093, 54892, 116113, 54971, 28234, 9759, 140612, 11124, 5558, 115072896, 1…	135	10753	19414	1.12339	1	0.771623	0.76745
GOTERM_BP_ALL	GO:0043549~regulation of kinase activity	10	4.23729	0.0740741	8440, 103, 6464, 5585, 5575, 5468, 26524, 1062, 55294, 8915	135	747	19414	1.92513	1	0.771623	0.76745
GOTERM_BP_ALL	GO:0098900~regulation of action potential	3	1.27119	0.0742325	7341, 288, 54795	135	65	19414	6.63726	1	0.771623	0.76745
GOTERM_BP_ALL	GO:0048812~neuron projection morphogenesis	9	3.81356	0.0742582	23390, 288, 8022, 25806, 23043, 26115, 6469, 23026, 1948	135	637	19414	2.03182	1	0.771623	0.76745
GOTERM_BP_ALL	GO:0097191~extrinsic apoptotic signaling pathway	5	2.11864	0.0743524	57630, 90, 3685, 11124, 8915	135	229	19414	3.1399	1	0.771623	0.76745
GOTERM_BP_ALL	GO:0009059~macromolecule biosynthetic process	49	20.7627	0.0744723	5187, 5585, 4773, 1063, 338699, 58476, 55841, 90, 1012, 10891, 6469, 9819, 643615, 50515, 284371, 55809, 7574, 8022, 55294, 23613, 29115, 5468, 55659, 9945, 7341, 22856, 11083, 25806, 7466, 26137, 1284, 6093, 54892, 116113, 9759, 140612, 11124, 5558, 8440, 91661, 6464, 221937, 116931, 23390, 10208, 103, 54505, 5602, 8915	135	5770	19414	1.22124	1	0.771623	0.76745
GOTERM_BP_ALL	GO:0032943~mononuclear cell proliferation	6	2.54237	0.0749083	8440, 5585, 8744, 57630, 4773, 6469	135	325	19414	2.65491	1	0.771623	0.76745
GOTERM_BP_ALL	GO:0045859~regulation of protein kinase activity	9	3.81356	0.0753109	8440, 103, 6464, 5585, 5575, 5468, 26524, 1062, 55294	135	639	19414	2.02546	1	0.771623	0.76745
GOTERM_BP_ALL	GO:0015918~sterol transport	4	1.69492	0.0753656	6469, 23673, 5468, 23762	135	142	19414	4.05091	1	0.771623	0.76745
GOTERM_BP_ALL	GO:0022409~positive regulation of cell-cell adhesion	6	2.54237	0.0756743	288, 8440, 8744, 6469, 1948, 8915	135	326	19414	2.64676	1	0.771623	0.76745
GOTERM_BP_ALL	GO:0018105~peptidyl-serine phosphorylation	6	2.54237	0.0756743	10769, 8440, 5585, 26524, 5603, 6093	135	326	19414	2.64676	1	0.771623	0.76745
GOTERM_BP_ALL	GO:0006366~transcription from RNA polymerase II promoter	22	9.32203	0.0757785	284371, 55809, 25806, 8022, 8440, 5187, 7466, 221937, 4773, 116931, 26137, 55294, 23613, 54892, 116113, 55841, 1012, 90, 6469, 10891, 9759, 5468	135	2194	19414	1.44201	1	0.771623	0.76745
GOTERM_BP_ALL	GO:0010466~negative regulation of peptidase activity	5	2.11864	0.0762191	7077, 1800, 57630, 28234, 115072896	135	231	19414	3.11271	1	0.771636	0.767462
GOTERM_BP_ALL	GO:0043523~regulation of neuron apoptotic process	5	2.11864	0.0762191	7466, 10891, 9759, 6093, 55294	135	231	19414	3.11271	1	0.771636	0.767462
GOTERM_BP_ALL	GO:0052547~regulation of peptidase activity	7	2.9661	0.0764428	7077, 1800, 57630, 28234, 5468, 115072896, 8915	135	428	19414	2.35199	1	0.771677	0.767503
GOTERM_BP_ALL	GO:0009889~regulation of biosynthetic process	44	18.6441	0.076913	7341, 5163, 25806, 5187, 7466, 5585, 4773, 26137, 1063, 6093, 338699, 116113, 58476, 55841, 90, 1012, 6469, 10891, 9759, 140612, 11124, 5558, 9819, 643615, 284371, 55809, 8022, 7574, 8440, 91661, 6464, 221937, 116931, 55294, 23613, 103, 29115, 54505, 5468, 55659, 5602, 60481, 53836, 8915	135	5098	19414	1.24118	1	0.773631	0.769446
GOTERM_BP_ALL	GO:0009416~response to light stimulus	6	2.54237	0.0772192	5187, 4313, 5602, 1040, 5603, 55294	135	328	19414	2.63062	1	0.773631	0.769446
GOTERM_BP_ALL	GO:0008015~blood circulation	8	3.38983	0.0776372	7341, 54795, 9759, 4313, 5468, 6339, 3778, 6093	135	535	19414	2.15039	1	0.773631	0.769446
GOTERM_BP_ALL	GO:0072001~renal system development	6	2.54237	0.077998	9510, 5175, 7466, 6469, 1063, 1948	135	329	19414	2.62263	1	0.773631	0.769446
GOTERM_BP_ALL	GO:0002682~regulation of immune system process	18	7.62712	0.0781347	22978, 8440, 8744, 5585, 4773, 26137, 57590, 55294, 10769, 57724, 103, 57630, 54795, 6469, 5468, 5602, 1948, 8915	135	1703	19414	1.51998	1	0.773631	0.769446
GOTERM_BP_ALL	GO:1905953~negative regulation of lipid localization	3	1.27119	0.0782188	3685, 6469, 5468	135	67	19414	6.43914	1	0.773631	0.769446
GOTERM_BP_ALL	GO:0006357~regulation of transcription from RNA polymerase II promoter	27	11.4407	0.0787311	25806, 5187, 7466, 5585, 4773, 26137, 116113, 55841, 90, 1012, 6469, 10891, 9759, 140612, 9819, 284371, 55809, 8022, 7574, 8440, 91661, 221937, 116931, 55294, 23613, 5468, 55659	135	2844	19414	1.36526	1	0.773631	0.769446
GOTERM_BP_ALL	GO:0006935~chemotaxis	9	3.81356	0.0796123	1800, 8022, 1012, 54795, 3685, 6469, 4313, 1948, 112616	135	647	19414	2.00041	1	0.773631	0.769446
GOTERM_BP_ALL	GO:0045760~positive regulation of action potential	2	0.847458	0.0797755	288, 54795	135	12	19414	23.9679	1	0.773631	0.769446
GOTERM_BP_ALL	GO:0033673~negative regulation of kinase activity	5	2.11864	0.0800231	103, 5585, 5575, 5468, 26524	135	235	19414	3.05973	1	0.773631	0.769446
GOTERM_BP_ALL	GO:0033344~cholesterol efflux	3	1.27119	0.0802368	6469, 23673, 5468	135	68	19414	6.34444	1	0.773631	0.769446
GOTERM_BP_ALL	GO:2001258~negative regulation of cation channel activity	3	1.27119	0.0802368	7341, 288, 6236	135	68	19414	6.34444	1	0.773631	0.769446
GOTERM_BP_ALL	GO:0016925~protein sumoylation	3	1.27119	0.0802368	7341, 54795, 9759	135	68	19414	6.34444	1	0.773631	0.769446
GOTERM_BP_ALL	GO:0051196~regulation of coenzyme metabolic process	3	1.27119	0.0802368	5163, 26137, 9759	135	68	19414	6.34444	1	0.773631	0.769446
GOTERM_BP_ALL	GO:0051051~negative regulation of transport	8	3.38983	0.0806454	7341, 288, 6236, 3685, 6469, 5468, 11124, 51715	135	540	19414	2.13048	1	0.773631	0.769446
GOTERM_BP_ALL	GO:0051301~cell division	9	3.81356	0.0807103	54892, 288, 10769, 6469, 56241, 26524, 1063, 1062, 6093	135	649	19414	1.99425	1	0.773631	0.769446
GOTERM_BP_ALL	GO:0043065~positive regulation of apoptotic process	9	3.81356	0.0807103	8440, 9759, 4313, 5468, 11124, 26524, 3778, 55294, 8915	135	649	19414	1.99425	1	0.773631	0.769446
GOTERM_BP_ALL	GO:0048584~positive regulation of response to stimulus	25	10.5932	0.0808265	22856, 7466, 4773, 6093, 100505385, 338699, 57724, 23043, 54795, 90, 1012, 6469, 11124, 8440, 6464, 5575, 57590, 55294, 23390, 10769, 57630, 3685, 5468, 5603, 8915	135	2594	19414	1.38596	1	0.773631	0.769446
GOTERM_BP_ALL	GO:1901214~regulation of neuron death	6	2.54237	0.0811558	7466, 10891, 9759, 1948, 6093, 55294	135	333	19414	2.59112	1	0.773631	0.769446
GOTERM_BP_ALL	GO:0051155~positive regulation of striated muscle cell differentiation	3	1.27119	0.0822709	4773, 6469, 1948	135	69	19414	6.2525	1	0.773631	0.769446
GOTERM_BP_ALL	GO:0042330~taxis	9	3.81356	0.0823743	1800, 8022, 1012, 54795, 3685, 6469, 4313, 1948, 112616	135	652	19414	1.98507	1	0.773631	0.769446
GOTERM_BP_ALL	GO:0060537~muscle tissue development	7	2.9661	0.0825601	90, 6469, 10891, 9759, 1063, 1948, 8470	135	437	19414	2.30355	1	0.773631	0.769446
GOTERM_BP_ALL	GO:0035296~regulation of tube diameter	4	1.69492	0.0829773	54795, 4313, 3778, 6093	135	148	19414	3.88669	1	0.773631	0.769446
GOTERM_BP_ALL	GO:0050880~regulation of blood vessel size	4	1.69492	0.0829773	54795, 4313, 3778, 6093	135	148	19414	3.88669	1	0.773631	0.769446
GOTERM_BP_ALL	GO:0097746~regulation of blood vessel diameter	4	1.69492	0.0829773	54795, 4313, 3778, 6093	135	148	19414	3.88669	1	0.773631	0.769446
GOTERM_BP_ALL	GO:0048858~cell projection morphogenesis	9	3.81356	0.0834949	23390, 288, 8022, 25806, 23043, 26115, 6469, 23026, 1948	135	654	19414	1.979	1	0.773631	0.769446
GOTERM_BP_ALL	GO:0051338~regulation of transferase activity	11	4.66102	0.0835438	8440, 103, 6464, 5585, 5575, 5468, 26524, 5558, 1062, 55294, 8915	135	880	19414	1.79759	1	0.773631	0.769446
GOTERM_BP_ALL	GO:0071214~cellular response to abiotic stimulus	6	2.54237	0.0835685	9759, 4313, 6339, 5603, 55294, 8915	135	336	19414	2.56799	1	0.773631	0.769446
GOTERM_BP_ALL	GO:0009892~negative regulation of metabolic process	32	13.5593	0.0837657	7341, 25806, 5187, 7466, 5585, 4773, 26137, 1063, 6093, 116113, 55841, 28234, 54971, 6469, 9759, 115072896, 8925, 7077, 55809, 8440, 6464, 5575, 221937, 26524, 55294, 23613, 1800, 103, 57630, 3685, 5468, 53836	135	3518	19414	1.30808	1	0.773631	0.769446
GOTERM_BP_ALL	GO:0001933~negative regulation of protein phosphorylation	7	2.9661	0.0839557	8440, 5187, 103, 5585, 5575, 5468, 26524	135	439	19414	2.29306	1	0.773631	0.769446
GOTERM_BP_ALL	GO:0050671~positive regulation of lymphocyte proliferation	4	1.69492	0.0842488	8440, 8744, 4773, 6469	135	149	19414	3.8606	1	0.773631	0.769446
GOTERM_BP_ALL	GO:0035150~regulation of tube size	4	1.69492	0.0842488	54795, 4313, 3778, 6093	135	149	19414	3.8606	1	0.773631	0.769446
GOTERM_BP_ALL	GO:0030032~lamellipodium assembly	3	1.27119	0.0843209	8440, 1012, 9759	135	70	19414	6.16317	1	0.773631	0.769446
GOTERM_BP_ALL	GO:0043297~apical junction assembly	3	1.27119	0.0843209	5175, 100132463, 6093	135	70	19414	6.16317	1	0.773631	0.769446
GOTERM_BP_ALL	GO:0003013~circulatory system process	8	3.38983	0.084344	7341, 54795, 9759, 4313, 5468, 6339, 3778, 6093	135	546	19414	2.10707	1	0.773631	0.769446
GOTERM_BP_ALL	GO:0009057~macromolecule catabolic process	15	6.35593	0.0853775	7077, 7341, 7466, 219333, 25897, 6093, 55294, 10769, 255488, 58476, 57630, 54971, 6469, 4313, 11124	135	1357	19414	1.58962	1	0.781071	0.776847
GOTERM_BP_ALL	GO:0044249~cellular biosynthetic process	56	23.7288	0.0858939	5187, 5585, 4773, 1063, 338699, 58476, 55841, 90, 1012, 10891, 6469, 9819, 643615, 50515, 284371, 55809, 7574, 8022, 55294, 23613, 29115, 5468, 55659, 9945, 60481, 53836, 7341, 5163, 22856, 11083, 25806, 7466, 26137, 1284, 1040, 6093, 54892, 116113, 9759, 140612, 11124, 5558, 57605, 8440, 91661, 6464, 221937, 116931, 23390, 10208, 103, 27430, 54505, 5602, 54947, 8915	135	6801	19414	1.18412	1	0.781809	0.777581
GOTERM_BP_ALL	GO:1901988~negative regulation of cell cycle phase transition	5	2.11864	0.0859033	10769, 90, 56241, 23026, 1063	135	241	19414	2.98356	1	0.781809	0.777581
GOTERM_BP_ALL	GO:0043068~positive regulation of programmed cell death	9	3.81356	0.086336	8440, 9759, 4313, 5468, 11124, 26524, 3778, 55294, 8915	135	659	19414	1.96399	1	0.783717	0.779478
GOTERM_BP_ALL	GO:0001678~cellular glucose homeostasis	4	1.69492	0.0869021	221937, 54795, 26137, 10891	135	151	19414	3.80947	1	0.786823	0.782567
GOTERM_BP_ALL	GO:0044248~cellular catabolic process	22	9.32203	0.0877097	7077, 7341, 22978, 7466, 219333, 221937, 26137, 23673, 25897, 6093, 55294, 1800, 10769, 57724, 255488, 58476, 57630, 28234, 6469, 11124, 51715, 8925	135	2234	19414	1.41619	1	0.792093	0.787809
GOTERM_BP_ALL	GO:0032946~positive regulation of mononuclear cell proliferation	4	1.69492	0.0881998	8440, 8744, 4773, 6469	135	152	19414	3.78441	1	0.79264	0.788353
GOTERM_BP_ALL	GO:0009410~response to xenobiotic stimulus	7	2.9661	0.0882215	1800, 4773, 28234, 9759, 4313, 5468, 1063	135	445	19414	2.26214	1	0.79264	0.788353
GOTERM_BP_ALL	GO:0045600~positive regulation of fat cell differentiation	3	1.27119	0.0884671	54795, 5468, 1040	135	72	19414	5.99198	1	0.792819	0.788531
GOTERM_BP_ALL	GO:0010605~negative regulation of macromolecule metabolic process	30	12.7119	0.0898915	7341, 25806, 5187, 7466, 5585, 4773, 26137, 1063, 6093, 116113, 55841, 28234, 54971, 6469, 9759, 115072896, 7077, 55809, 8440, 6464, 5575, 221937, 26524, 55294, 23613, 1800, 103, 57630, 3685, 5468	135	3278	19414	1.31611	1	0.803534	0.799188
GOTERM_BP_ALL	GO:0014823~response to activity	3	1.27119	0.0905627	10891, 4313, 1284	135	73	19414	5.90989	1	0.805435	0.801079
GOTERM_BP_ALL	GO:0051145~smooth muscle cell differentiation	3	1.27119	0.0905627	4773, 90, 6469	135	73	19414	5.90989	1	0.805435	0.801079
GOTERM_BP_ALL	GO:0046649~lymphocyte activation	11	4.66102	0.0909522	8440, 1015, 5585, 8744, 57630, 4773, 6469, 9759, 1948, 112616, 8915	135	895	19414	1.76747	1	0.806857	0.802493
GOTERM_BP_ALL	GO:0030198~extracellular matrix organization	6	2.54237	0.0918834	9510, 1288, 3685, 4313, 1284, 9509	135	346	19414	2.49377	1	0.811866	0.807475
GOTERM_BP_ALL	GO:1902260~negative regulation of delayed rectifier potassium channel activity	2	0.847458	0.092443	7341, 288	135	14	19414	20.5439	1	0.811866	0.807475
GOTERM_BP_ALL	GO:0010745~negative regulation of macrophage derived foam cell differentiation	2	0.847458	0.092443	3685, 5468	135	14	19414	20.5439	1	0.811866	0.807475
GOTERM_BP_ALL	GO:0044057~regulation of system process	8	3.38983	0.0926885	7341, 5575, 54795, 9759, 4313, 5468, 3778, 6093	135	559	19414	2.05807	1	0.811866	0.807475
GOTERM_BP_ALL	GO:0043062~extracellular structure organization	6	2.54237	0.0927377	9510, 1288, 3685, 4313, 1284, 9509	135	347	19414	2.48658	1	0.811866	0.807475
GOTERM_BP_ALL	GO:0009888~tissue development	21	8.89831	0.0929036	22856, 25806, 8022, 5175, 1284, 26524, 1063, 6093, 8470, 54795, 90, 388697, 3685, 6469, 10891, 9759, 4313, 5468, 1948, 8915, 50515	135	2123	19414	1.42249	1	0.811866	0.807475
GOTERM_BP_ALL	GO:0048699~generation of neurons	17	7.20339	0.09317	25806, 8022, 8440, 26115, 23026, 6093, 23390, 288, 57630, 23043, 8835, 6469, 4313, 5468, 1948, 89796, 8925	135	1622	19414	1.50723	1	0.812174	0.807781
GOTERM_BP_ALL	GO:0050793~regulation of developmental process	27	11.4407	0.0944652	5585, 4773, 26115, 161176, 9260, 1284, 1063, 1040, 6093, 23043, 55841, 54795, 90, 6469, 10891, 9759, 9510, 6464, 8744, 26524, 55294, 10769, 57630, 8835, 3685, 5468, 1948	135	2901	19414	1.33844	1	0.821427	0.816984
GOTERM_BP_ALL	GO:0032990~cell part morphogenesis	9	3.81356	0.095198	23390, 288, 8022, 25806, 23043, 26115, 6469, 23026, 1948	135	674	19414	1.92028	1	0.824822	0.820361
GOTERM_BP_ALL	GO:0018209~peptidyl-serine modification	6	2.54237	0.0953253	10769, 8440, 5585, 26524, 5603, 6093	135	350	19414	2.46527	1	0.824822	0.820361
GOTERM_BP_ALL	GO:0048534~hematopoietic or lymphoid organ development	12	5.08475	0.0968491	54892, 103, 1015, 5585, 8744, 57630, 9644, 6469, 9759, 5468, 112616, 55294	135	1024	19414	1.68524	1	0.835948	0.831427
GOTERM_BP_ALL	GO:0022607~cellular component assembly	30	12.7119	0.0976202	7341, 347240, 1063, 1183, 1062, 6093, 23523, 100132463, 1015, 58476, 23043, 54795, 1012, 10891, 9759, 11124, 643615, 5175, 8440, 1010, 23673, 401541, 2060, 10769, 288, 103, 54505, 1948, 51715, 8915	135	3306	19414	1.30497	1	0.840539	0.835993
GOTERM_BP_ALL	GO:0032879~regulation of localization	28	11.8644	0.0980244	7341, 5187, 7466, 5585, 6236, 6093, 58476, 54795, 90, 1012, 6469, 10891, 9759, 11124, 3778, 9510, 5175, 26524, 55294, 23613, 1800, 10769, 288, 3685, 4313, 5468, 10188, 51715	135	3044	19414	1.3228	1	0.841956	0.837402
GOTERM_BP_ALL	GO:1905203~regulation of connective tissue replacement	2	0.847458	0.0987117	5468, 6093	135	15	19414	19.1743	1	0.842849	0.838291
GOTERM_BP_ALL	GO:0070932~histone H3 deacetylation	2	0.847458	0.0987117	5187, 9759	135	15	19414	19.1743	1	0.842849	0.838291
GOTERM_BP_ALL	GO:1901863~positive regulation of muscle tissue development	3	1.27119	0.0990882	6469, 10891, 1948	135	77	19414	5.60289	1	0.842849	0.838291
GOTERM_BP_ALL	GO:0051193~regulation of cofactor metabolic process	3	1.27119	0.0990882	5163, 26137, 9759	135	77	19414	5.60289	1	0.842849	0.838291

## Sheet: GO BP All selected for Figure 6
Category	Term	Count	%	PValue	Genes	List Total	Pop Hits	Pop Total	Fold Enrichment	Bonferroni	Benjamini	FDR
GOTERM_BP_ALL	GO:0050896~response to stimulus	83	35.1695	0.00374819	5187, 5585, 64599, 6236, 5664, 4773, 1063, 1260, 23523, 338699, 83998, 1015, 23043, 55841, 54795, 90, 1012, 10891, 6469, 9819, 50515, 91442, 9510, 55809, 8022, 8744, 6002, 26524, 55890, 57590, 55294, 23613, 288, 57630, 29115, 3685, 5468, 5623, 1948, 10188, 9945, 53836, 7341, 5163, 22856, 6452, 22978, 11083, 25806, 7466, 26137, 1284, 23026, 1040, 6093, 100505385, 8470, 57724, 28234, 9759, 11124, 5…	135	9580	19414	1.24593	0.999998	0.257009	0.255619
GOTERM_BP_ALL	GO:0016043~cellular component organization	71	30.0847	0.000169582	5187, 5585, 347240, 5664, 4773, 26115, 161176, 9260, 1063, 1183, 1062, 23523, 1015, 58476, 23043, 54795, 1012, 10891, 6469, 8925, 643615, 9510, 55809, 8022, 26524, 55294, 23613, 288, 29115, 388697, 3685, 5468, 1948, 10188, 3801, 9509, 7341, 25806, 8675, 1284, 23026, 6093, 100505385, 8470, 54892, 100132463, 57724, 54971, 9759, 11124, 89796, 3778, 5175, 8440, 6464, 1010, 23673, 401541, 25897, 2060,…	135	7129	19414	1.43222	0.448873	0.105667	0.105096
GOTERM_BP_ALL	GO:0007154~cell communication	64	27.1186	0.00301925	5187, 5585, 64599, 6236, 5664, 4773, 23523, 1015, 23043, 55841, 54795, 90, 1012, 6469, 50515, 9510, 55809, 8744, 6002, 26524, 55890, 57590, 55294, 288, 57630, 3685, 5468, 5623, 1948, 10188, 53836, 5163, 22856, 6452, 11083, 25806, 7466, 1284, 23026, 1040, 6093, 100505385, 8470, 57724, 54212, 9759, 11124, 57605, 1438, 5175, 8440, 6464, 5575, 25897, 112616, 23390, 10769, 103, 1288, 8835, 4313, 5602,…	135	6827	19414	1.34813	0.999976	0.252539	0.251173
GOTERM_BP_ALL	GO:0007165~signal transduction	62	26.2712	0.000828006	5187, 5585, 64599, 6236, 5664, 4773, 23523, 1015, 23043, 55841, 54795, 90, 1012, 6469, 50515, 9510, 55809, 8744, 6002, 26524, 55890, 57590, 55294, 288, 57630, 3685, 5468, 5623, 1948, 10188, 53836, 5163, 22856, 6452, 11083, 25806, 7466, 1284, 23026, 1040, 6093, 100505385, 8470, 57724, 9759, 11124, 57605, 1438, 5175, 8440, 6464, 5575, 112616, 23390, 10769, 103, 1288, 8835, 4313, 5602, 5603, 8915	135	6248	19414	1.42703	0.945524	0.181799	0.180816
GOTERM_BP_ALL	GO:0032502~developmental process	61	25.8475	0.0105756	5585, 4773, 26115, 161176, 9260, 23762, 1063, 1015, 58476, 23043, 55841, 54795, 90, 1012, 10891, 6469, 8925, 50515, 9510, 8022, 8744, 26524, 55294, 23613, 288, 57630, 388697, 3685, 5468, 5623, 1948, 10188, 9509, 7341, 22856, 25806, 7466, 9644, 1284, 23026, 1040, 6093, 8470, 54892, 116113, 9759, 89796, 5175, 8440, 6464, 221937, 1010, 112616, 23390, 10769, 103, 8835, 4313, 5602, 51715, 8915	135	6759	19414	1.29786	1	0.367842	0.365852
GOTERM_BP_ALL	GO:0030154~cell differentiation	44	18.6441	0.0106908	22856, 25806, 4773, 9644, 26115, 9260, 1284, 23762, 1063, 23026, 1040, 6093, 8470, 54892, 1015, 58476, 23043, 54795, 90, 6469, 10891, 9759, 89796, 8925, 50515, 8022, 5175, 8440, 8744, 221937, 26524, 112616, 55294, 23390, 288, 103, 57630, 388697, 8835, 3685, 4313, 5468, 10188, 1948	135	4487	19414	1.41019	1	0.368203	0.366211
GOTERM_BP_ALL	GO:0006464~cellular protein modification process	42	17.7966	0.00417152	7341, 5163, 22978, 5187, 7466, 5585, 1062, 6093, 23043, 54795, 90, 6469, 10891, 9759, 8925, 1438, 55809, 5175, 8440, 6464, 219333, 5575, 26524, 25897, 55294, 23390, 57337, 10769, 10208, 255488, 103, 57630, 29115, 8835, 5522, 3685, 5468, 10188, 9945, 5602, 5603, 8915	135	4009	19414	1.50659	1	0.257009	0.255619
GOTERM_BP_ALL	GO:0032774~RNA biosynthetic process	41	17.3729	0.00434118	7341, 11083, 25806, 5187, 7466, 5585, 4773, 26137, 1284, 1063, 338699, 54892, 116113, 58476, 55841, 90, 1012, 6469, 10891, 9759, 140612, 5558, 9819, 643615, 284371, 55809, 8022, 7574, 8440, 91661, 6464, 221937, 116931, 55294, 23613, 10208, 29115, 5468, 55659, 5602, 8915	135	3892	19414	1.51493	1	0.257009	0.255619
GOTERM_BP_ALL	GO:0007166~cell surface receptor signaling pathway	38	16.1017	0.000184069	22856, 25806, 64599, 5664, 4773, 1284, 23523, 8470, 1015, 23043, 54795, 90, 1012, 6469, 9759, 11124, 50515, 1438, 9510, 5175, 8440, 6464, 8744, 5575, 26524, 55294, 103, 57630, 1288, 8835, 3685, 4313, 5468, 10188, 1948, 5602, 53836, 8915	135	2975	19414	1.83687	0.476226	0.105667	0.105096
GOTERM_BP_ALL	GO:0006793~phosphorus metabolic process	38	16.1017	0.00162508	5163, 22978, 5187, 5585, 26137, 1040, 1062, 6093, 23043, 90, 10891, 9759, 57605, 1438, 5175, 8440, 6464, 5575, 221937, 26524, 55294, 23390, 10769, 103, 57630, 8835, 5522, 3685, 5468, 10188, 9945, 5602, 60481, 5603, 51715, 54947, 53836, 8915	135	3328	19414	1.64203	0.996699	0.228357	0.227121
GOTERM_BP_ALL	GO:0008219~cell death	31	13.1356	0.000291272	5163, 11083, 7466, 5585, 5664, 6093, 90, 6469, 10891, 9759, 11124, 3778, 50515, 8022, 8440, 6464, 8744, 26524, 55294, 1800, 23390, 10769, 255488, 103, 57630, 8835, 3685, 4313, 5468, 1948, 8915	135	2257	19414	1.9752	0.640624	0.112681	0.112071
GOTERM_BP_ALL	GO:0006915~apoptotic process	28	11.8644	0.000320754	5163, 11083, 7466, 5585, 5664, 6093, 90, 6469, 10891, 9759, 11124, 3778, 50515, 8022, 8440, 6464, 26524, 55294, 1800, 10769, 255488, 103, 57630, 8835, 3685, 4313, 5468, 8915	135	1947	19414	2.06811	0.675993	0.112681	0.112071
GOTERM_BP_ALL	GO:0008283~cell proliferation	23	9.74576	0.0247195	9510, 5163, 8440, 6464, 8744, 5585, 4773, 23026, 55294, 54892, 10208, 57630, 54795, 1012, 3685, 6469, 10891, 9759, 4313, 5468, 1948, 50514, 1438	135	2056	19414	1.60874	1	0.490619	0.487966
GOTERM_BP_ALL	GO:0016477~cell migration	22	9.32203	0.00281888	9510, 5175, 8440, 5585, 4773, 6093, 55294, 23613, 1800, 10769, 57630, 55841, 54795, 1012, 90, 3685, 6469, 9759, 4313, 5468, 1948, 89796	135	1585	19414	1.99606	0.999951	0.252539	0.251173
GOTERM_BP_ALL	GO:0007155~cell adhesion	19	8.05085	0.0262456	5175, 8440, 6464, 8744, 1010, 6093, 288, 100132463, 1015, 57630, 1288, 1012, 90, 3685, 6469, 4313, 1948, 3801, 8915	135	1596	19414	1.71199	1	0.503829	0.501104
GOTERM_BP_ALL	GO:0001525~angiogenesis	13	5.50847	0.00126748	9510, 6464, 1284, 6093, 55294, 10769, 1012, 90, 3685, 6469, 4313, 5468, 1948	135	622	19414	3.00562	0.988385	0.222633	0.221429
GOTERM_BP_ALL	GO:0001649~osteoblast differentiation	8	3.38983	0.00173263	103, 58476, 90, 54795, 6469, 9759, 9260, 5468	135	249	19414	4.62032	0.997739	0.234106	0.232839
GOTERM_BP_ALL	GO:0045216~cell-cell junction organization	8	3.38983	0.00320864	5175, 100132463, 1015, 1012, 1010, 1948, 6093, 3801	135	278	19414	4.13834	0.999988	0.257009	0.255619
GOTERM_BP_ALL	GO:0001655~urogenital system development	8	3.38983	0.0146168	9510, 5175, 7466, 90, 6469, 4313, 1063, 1948	135	371	19414	3.10097	1	0.413952	0.411713
GOTERM_BP_ALL	GO:1901861~regulation of muscle tissue development	6	2.54237	0.00409512	90, 6469, 10891, 9759, 1063, 1948	135	152	19414	5.67661	0.999999	0.257009	0.255619
GOTERM_BP_ALL	GO:1902806~regulation of cell cycle G1/S phase transition	6	2.54237	0.0193549	9510, 10769, 90, 56241, 23026, 55294	135	223	19414	3.86926	1	0.436262	0.433902
GOTERM_BP_ALL	GO:0042593~glucose homeostasis	6	2.54237	0.0302353	7466, 221937, 54795, 26137, 10891, 5468	135	251	19414	3.43763	1	0.516474	0.513681
GOTERM_BP_ALL	GO:0071559~response to transforming growth factor beta	6	2.54237	0.0484093	90, 5468, 1284, 26524, 6093, 50515	135	286	19414	3.01694	1	0.650333	0.646816
GOTERM_BP_ALL	GO:1901184~regulation of ERBB signaling pathway	4	1.69492	0.0223774	8440, 6464, 1012, 55294	135	87	19414	6.61183	1	0.46641	0.463888
GOTERM_BP_ALL	GO:0019217~regulation of fatty acid metabolic process	4	1.69492	0.0406884	5163, 10891, 5468, 60481	135	110	19414	5.22936	1	0.595576	0.592355
GOTERM_BP_ALL	GO:0007176~regulation of epidermal growth factor-activated receptor activity	3	1.27119	0.0181296	8440, 6464, 55294	135	30	19414	14.3807	1	0.43326	0.430917
GOTERM_BP_ALL	GO:0035329~hippo signaling	3	1.27119	0.0340136	55841, 26524, 100505385	135	42	19414	10.272	1	0.538072	0.535162
GOTERM_BP_ALL	GO:0090130~tissue migration	7	2.9661	0.0504118	10769, 5585, 1012, 5468, 1948, 6093, 55294	135	384	19414	2.62149	1	0.670334	0.666709
GOTERM_BP_ALL	GO:0019222~regulation of metabolic process	63	26.6949	0.0506272	5187, 5585, 4773, 1063, 1062, 338699, 58476, 23043, 55841, 90, 1012, 10891, 6469, 9819, 8925, 643615, 284371, 55809, 7574, 8022, 26524, 55294, 23613, 288, 57630, 29115, 3685, 5468, 55659, 10188, 60481, 53836, 7341, 5163, 25806, 7466, 26137, 6093, 116113, 54971, 28234, 9759, 140612, 11124, 5558, 115072896, 7077, 5175, 8440, 91661, 6464, 5575, 221937, 116931, 25897, 1800, 23390, 10769, 255488, 103,…	135	7567	19414	1.19729	1	0.670334	0.666709
GOTERM_BP_ALL	GO:0006109~regulation of carbohydrate metabolic process	5	2.11864	0.0507569	5163, 221937, 26137, 10891, 9759	135	201	19414	3.5773	1	0.670334	0.666709
GOTERM_BP_ALL	GO:0051153~regulation of striated muscle cell differentiation	4	1.69492	0.0514493	4773, 6469, 9759, 1948	135	121	19414	4.75396	1	0.675015	0.671364
GOTERM_BP_ALL	GO:0006996~organelle organization	40	16.9492	0.0514956	7341, 5187, 5585, 347240, 8675, 161176, 9260, 1063, 1183, 1062, 6093, 100505385, 23523, 8470, 54892, 57724, 58476, 23043, 54971, 6469, 10891, 9759, 89796, 55809, 8440, 6464, 23673, 401541, 25897, 55294, 2060, 23613, 10769, 288, 10208, 29115, 54505, 5468, 51715, 3801	135	4416	19414	1.3026	1	0.675015	0.671364
GOTERM_BP_ALL	GO:0048013~ephrin receptor signaling pathway	3	1.27119	0.0518472	8440, 4313, 1948	135	53	19414	8.14004	1	0.677097	0.673435
GOTERM_BP_ALL	GO:0017038~protein import	6	2.54237	0.0520552	7341, 103, 6469, 5468, 11124, 51715	135	292	19414	2.95495	1	0.677296	0.673633
GOTERM_BP_ALL	GO:0060255~regulation of macromolecule metabolic process	59	25	0.052278	5187, 5585, 4773, 1063, 1062, 338699, 58476, 23043, 55841, 90, 1012, 10891, 6469, 9819, 643615, 284371, 55809, 7574, 8022, 26524, 55294, 23613, 288, 57630, 29115, 3685, 5468, 55659, 10188, 7341, 25806, 7466, 26137, 6093, 116113, 54971, 28234, 9759, 140612, 11124, 5558, 115072896, 7077, 5175, 8440, 91661, 6464, 5575, 221937, 116931, 25897, 1800, 23390, 10769, 255488, 103, 54505, 5602, 8915	135	7018	19414	1.20898	1	0.677685	0.67402
GOTERM_BP_ALL	GO:0050790~regulation of catalytic activity	21	8.89831	0.0527277	7077, 7341, 8440, 6464, 5585, 5575, 5664, 26524, 1062, 6093, 55294, 1800, 103, 57630, 28234, 5468, 5558, 115072896, 119385, 53836, 8915	135	1979	19414	1.526	1	0.678878	0.675206
GOTERM_BP_ALL	GO:0030030~cell projection organization	18	7.62712	0.0527793	25806, 8022, 8440, 347240, 26115, 23026, 1183, 6093, 23390, 288, 23043, 1012, 6469, 9759, 4313, 1948, 51715, 8925	135	1615	19414	1.60281	1	0.678878	0.675206
GOTERM_BP_ALL	GO:1903827~regulation of cellular protein localization	9	3.81356	0.0529498	7341, 288, 58476, 6469, 5468, 11124, 26524, 51715, 55294	135	592	19414	2.18626	1	0.678878	0.675206
GOTERM_BP_ALL	GO:0007249~I-kappaB kinase/NF-kappaB signaling	6	2.54237	0.0533054	23390, 10769, 5187, 11124, 6093, 8915	135	294	19414	2.93485	1	0.680952	0.677269
GOTERM_BP_ALL	GO:0031324~negative regulation of cellular metabolic process	31	13.1356	0.0535373	7341, 25806, 5187, 7466, 5585, 4773, 26137, 1063, 6093, 116113, 55841, 28234, 6469, 9759, 115072896, 8925, 7077, 55809, 8440, 6464, 5575, 221937, 26524, 55294, 23613, 1800, 103, 57630, 3685, 5468, 53836	135	3246	19414	1.37339	1	0.681436	0.677751
GOTERM_BP_ALL	GO:0051045~negative regulation of membrane protein ectodomain proteolysis	2	0.847458	0.0539117	7077, 6093	135	8	19414	35.9519	1	0.681585	0.677899
GOTERM_BP_ALL	GO:0018108~peptidyl-tyrosine phosphorylation	6	2.54237	0.053937	5175, 8440, 6464, 90, 10188, 55294	135	295	19414	2.9249	1	0.681585	0.677899
GOTERM_BP_ALL	GO:0031401~positive regulation of protein modification process	15	6.35593	0.0547565	5175, 7466, 6464, 1062, 6093, 55294, 29115, 57630, 23043, 90, 10891, 9759, 5468, 10188, 8915	135	1267	19414	1.70253	1	0.689461	0.685732
GOTERM_BP_ALL	GO:0010883~regulation of lipid storage	3	1.27119	0.0553818	3685, 5468, 55294	135	55	19414	7.84404	1	0.692608	0.688862
GOTERM_BP_ALL	GO:0045934~negative regulation of nucleobase-containing compound metabolic process	18	7.62712	0.0555783	7341, 55809, 25806, 8440, 5187, 7466, 6464, 221937, 4773, 26137, 1063, 23613, 116113, 55841, 6469, 9759, 5468, 53836	135	1626	19414	1.59196	1	0.692608	0.688862
GOTERM_BP_ALL	GO:0006511~ubiquitin-dependent protein catabolic process	10	4.23729	0.0555979	7341, 255488, 7466, 58476, 57630, 219333, 6469, 11124, 25897, 55294	135	705	19414	2.03982	1	0.692608	0.688862
GOTERM_BP_ALL	GO:0018212~peptidyl-tyrosine modification	6	2.54237	0.055858	5175, 8440, 6464, 90, 10188, 55294	135	298	19414	2.89545	1	0.69339	0.68964
GOTERM_BP_ALL	GO:0035601~protein deacylation	4	1.69492	0.0578429	55809, 5187, 29115, 9759	135	127	19414	4.52937	1	0.7155	0.71163
GOTERM_BP_ALL	GO:0009056~catabolic process	26	11.0169	0.0582438	7341, 22978, 7466, 26137, 6093, 57724, 58476, 28234, 54971, 6469, 9759, 11124, 8925, 7077, 219333, 221937, 23673, 25897, 55294, 1800, 10769, 255488, 57630, 4313, 51715, 9509	135	2629	19414	1.42221	1	0.715809	0.711937
GOTERM_BP_ALL	GO:0044260~cellular macromolecule metabolic process	79	33.4746	0.0582754	5187, 5585, 5664, 4773, 1063, 1062, 338699, 58476, 23043, 55841, 54795, 90, 1012, 10891, 6469, 9819, 8925, 643615, 50515, 91442, 284371, 55809, 7574, 8022, 219333, 26524, 55294, 100113393, 23613, 57630, 29115, 3685, 5468, 55659, 10188, 9945, 7341, 5163, 22856, 22978, 11083, 25806, 7466, 26137, 1284, 6093, 54892, 116113, 28234, 9759, 140612, 11124, 5558, 115072896, 1438, 7077, 5175, 8440, 91661, 6…	135	9919	19414	1.14536	1	0.715809	0.711937
GOTERM_BP_ALL	GO:0006469~negative regulation of protein kinase activity	5	2.11864	0.0586324	103, 5585, 5575, 5468, 26524	135	211	19414	3.40776	1	0.717172	0.713293
GOTERM_BP_ALL	GO:0098732~macromolecule deacylation	4	1.69492	0.0589434	55809, 5187, 29115, 9759	135	128	19414	4.49398	1	0.717172	0.713293
GOTERM_BP_ALL	GO:0060612~adipose tissue development	3	1.27119	0.0589987	54795, 10891, 5468	135	57	19414	7.56881	1	0.717172	0.713293
GOTERM_BP_ALL	GO:0019941~modification-dependent protein catabolic process	10	4.23729	0.0596907	7341, 255488, 7466, 58476, 57630, 219333, 6469, 11124, 25897, 55294	135	715	19414	2.01129	1	0.720595	0.716698
GOTERM_BP_ALL	GO:0010942~positive regulation of cell death	10	4.23729	0.0596907	8440, 9759, 4313, 5468, 11124, 26524, 1948, 3778, 55294, 8915	135	715	19414	2.01129	1	0.720595	0.716698
GOTERM_BP_ALL	GO:0048259~regulation of receptor-mediated endocytosis	4	1.69492	0.060026	3685, 5468, 10188, 6093	135	129	19414	4.45914	1	0.72203	0.718125
GOTERM_BP_ALL	GO:0000082~G1/S transition of mitotic cell cycle	5	2.11864	0.0602817	9510, 10769, 90, 26524, 23026	135	213	19414	3.37576	1	0.72203	0.718125
GOTERM_BP_ALL	GO:0051146~striated muscle cell differentiation	6	2.54237	0.0604931	4773, 90, 6469, 9759, 1948, 8470	135	305	19414	2.829	1	0.72203	0.718125
GOTERM_BP_ALL	GO:0010648~negative regulation of cell communication	17	7.20339	0.0608193	8440, 5187, 7466, 6002, 26524, 55294, 10769, 103, 57630, 55841, 90, 8835, 3685, 6469, 5468, 11124, 50515	135	1525	19414	1.6031	1	0.72203	0.718125
GOTERM_BP_ALL	GO:0001706~endoderm formation	3	1.27119	0.0608372	3685, 4313, 1284	135	58	19414	7.43831	1	0.72203	0.718125
GOTERM_BP_ALL	GO:0001704~formation of primary germ layer	4	1.69492	0.0611735	90, 3685, 4313, 1284	135	130	19414	4.42484	1	0.723578	0.719665
GOTERM_BP_ALL	GO:0010498~proteasomal protein catabolic process	8	3.38983	0.0615181	7341, 255488, 7466, 57630, 6469, 11124, 25897, 55294	135	506	19414	2.27363	1	0.725211	0.721289
GOTERM_BP_ALL	GO:0032446~protein modification by small protein conjugation	12	5.08475	0.0618258	7341, 22978, 255488, 7466, 57630, 54795, 8835, 9759, 25897, 8925, 55294, 8915	135	943	19414	1.83	1	0.726392	0.722463
GOTERM_BP_ALL	GO:0045765~regulation of angiogenesis	7	2.9661	0.0620318	9510, 10769, 6464, 5468, 1284, 6093, 55294	135	405	19414	2.48556	1	0.726392	0.722463
GOTERM_BP_ALL	GO:0023057~negative regulation of signaling	17	7.20339	0.0622644	8440, 5187, 7466, 6002, 26524, 55294, 10769, 103, 57630, 55841, 90, 8835, 3685, 6469, 5468, 11124, 50515	135	1530	19414	1.59786	1	0.726694	0.722764
GOTERM_BP_ALL	GO:0034645~cellular macromolecule biosynthetic process	49	20.7627	0.0629838	5187, 5585, 4773, 1063, 338699, 58476, 55841, 90, 1012, 10891, 6469, 9819, 643615, 50515, 284371, 55809, 7574, 8022, 55294, 23613, 29115, 5468, 55659, 9945, 7341, 22856, 11083, 25806, 7466, 26137, 1284, 6093, 54892, 116113, 9759, 140612, 11124, 5558, 8440, 91661, 6464, 221937, 116931, 23390, 10208, 103, 54505, 5602, 8915	135	5705	19414	1.23516	1	0.73023	0.72628
GOTERM_BP_ALL	GO:0015850~organic hydroxy compound transport	6	2.54237	0.0632375	28234, 6469, 23673, 5468, 23762, 441432	135	309	19414	2.79238	1	0.73023	0.72628
GOTERM_BP_ALL	GO:0009968~negative regulation of signal transduction	16	6.77966	0.0640179	8440, 5187, 7466, 6002, 26524, 55294, 103, 57630, 55841, 90, 8835, 3685, 6469, 5468, 11124, 50515	135	1416	19414	1.62494	1	0.73023	0.72628
GOTERM_BP_ALL	GO:0023014~signal transduction by protein phosphorylation	11	4.66102	0.0640312	23390, 5187, 6464, 57630, 23043, 3685, 5468, 5602, 5603, 6093, 55294	135	836	19414	1.8922	1	0.73023	0.72628
GOTERM_BP_ALL	GO:0000165~MAPK cascade	11	4.66102	0.0640312	23390, 5187, 6464, 57630, 23043, 3685, 5468, 5602, 5603, 6093, 55294	135	836	19414	1.8922	1	0.73023	0.72628
GOTERM_BP_ALL	GO:0038127~ERBB signaling pathway	4	1.69492	0.0645933	8440, 6464, 1012, 55294	135	133	19414	4.32503	1	0.73023	0.72628
GOTERM_BP_ALL	GO:0034599~cellular response to oxidative stress	6	2.54237	0.0646358	1800, 5163, 10891, 4313, 5603, 55294	135	311	19414	2.77442	1	0.73023	0.72628
GOTERM_BP_ALL	GO:0043632~modification-dependent macromolecule catabolic process	10	4.23729	0.0648533	7341, 255488, 7466, 58476, 57630, 219333, 6469, 11124, 25897, 55294	135	727	19414	1.97809	1	0.73023	0.72628
GOTERM_BP_ALL	GO:0019219~regulation of nucleobase-containing compound metabolic process	39	16.5254	0.0649053	7341, 25806, 5187, 7466, 5585, 4773, 26137, 1063, 338699, 116113, 58476, 55841, 90, 1012, 6469, 10891, 9759, 140612, 11124, 5558, 9819, 643615, 284371, 55809, 8022, 7574, 8440, 91661, 6464, 221937, 116931, 55294, 23613, 29115, 5468, 55659, 5602, 53836, 8915	135	4361	19414	1.28606	1	0.73023	0.72628
GOTERM_BP_ALL	GO:0032386~regulation of intracellular transport	8	3.38983	0.0652015	7341, 288, 6469, 5468, 11124, 6093, 51715, 55294	135	513	19414	2.24261	1	0.73023	0.72628
GOTERM_BP_ALL	GO:0031326~regulation of cellular biosynthetic process	44	18.6441	0.0657224	7341, 5163, 25806, 5187, 7466, 5585, 4773, 26137, 1063, 6093, 338699, 116113, 58476, 55841, 90, 1012, 6469, 10891, 9759, 140612, 11124, 5558, 9819, 643615, 284371, 55809, 8022, 7574, 8440, 91661, 6464, 221937, 116931, 55294, 23613, 103, 29115, 54505, 5468, 55659, 5602, 60481, 53836, 8915	135	5039	19414	1.25571	1	0.73023	0.72628
GOTERM_BP_ALL	GO:0006898~receptor-mediated endocytosis	6	2.54237	0.0660515	3685, 9260, 5468, 10188, 6093, 2060	135	313	19414	2.75669	1	0.73023	0.72628
GOTERM_BP_ALL	GO:0023056~positive regulation of signaling	20	8.47458	0.066227	22856, 8440, 6464, 5575, 6093, 100505385, 57590, 55294, 23390, 10769, 57630, 23043, 54795, 1012, 90, 3685, 6469, 5468, 11124, 8915	135	1910	19414	1.50584	1	0.73023	0.72628
GOTERM_BP_ALL	GO:0071383~cellular response to steroid hormone stimulus	5	2.11864	0.0662472	55809, 5187, 5585, 90, 6339	135	220	19414	3.26835	1	0.73023	0.72628
GOTERM_BP_ALL	GO:0032501~multicellular organismal process	66	27.9661	0.0663989	5187, 5585, 4773, 26115, 9260, 23762, 1063, 1260, 338699, 1015, 58476, 23043, 55841, 54795, 90, 1012, 10891, 6469, 8925, 50515, 9510, 8022, 8744, 26524, 55294, 23613, 288, 57630, 388697, 3685, 5468, 5623, 1948, 3801, 9509, 7341, 22856, 25806, 7466, 9644, 26137, 1284, 23026, 6093, 8470, 54892, 116113, 9759, 89796, 3778, 5175, 8440, 6464, 5575, 221937, 1010, 112616, 23390, 10769, 103, 8835, 4313, 6…	135	8102	19414	1.17147	1	0.73023	0.72628
GOTERM_BP_ALL	GO:0070830~bicellular tight junction assembly	3	1.27119	0.066468	5175, 100132463, 6093	135	61	19414	7.0725	1	0.73023	0.72628
GOTERM_BP_ALL	GO:0033619~membrane protein proteolysis	3	1.27119	0.066468	7077, 5664, 6093	135	61	19414	7.0725	1	0.73023	0.72628
GOTERM_BP_ALL	GO:1904181~positive regulation of membrane depolarization	2	0.847458	0.0669325	288, 54795	135	10	19414	28.7615	1	0.73023	0.72628
GOTERM_BP_ALL	GO:0001542~ovulation from ovarian follicle	2	0.847458	0.0669325	9510, 4313	135	10	19414	28.7615	1	0.73023	0.72628
GOTERM_BP_ALL	GO:0016926~protein desumoylation	2	0.847458	0.0669325	57337, 10208	135	10	19414	28.7615	1	0.73023	0.72628
GOTERM_BP_ALL	GO:1904179~positive regulation of adipose tissue development	2	0.847458	0.0669325	54795, 5468	135	10	19414	28.7615	1	0.73023	0.72628
GOTERM_BP_ALL	GO:0045944~positive regulation of transcription from RNA polymerase II promoter	15	6.35593	0.0675802	284371, 55809, 8022, 8440, 5187, 4773, 116931, 55294, 23613, 1012, 90, 6469, 10891, 9759, 5468	135	1308	19414	1.64917	1	0.735013	0.731038
GOTERM_BP_ALL	GO:0002521~leukocyte differentiation	9	3.81356	0.0701379	1015, 8744, 57630, 9644, 6469, 9759, 5468, 112616, 55294	135	629	19414	2.05766	1	0.75634	0.75225
GOTERM_BP_ALL	GO:0045668~negative regulation of osteoblast differentiation	3	1.27119	0.0703147	54795, 9759, 5468	135	63	19414	6.84797	1	0.75634	0.75225
GOTERM_BP_ALL	GO:0042177~negative regulation of protein catabolic process	4	1.69492	0.0703903	7077, 54971, 6469, 6093	135	138	19414	4.16833	1	0.75634	0.75225
GOTERM_BP_ALL	GO:0001822~kidney development	6	2.54237	0.0704023	9510, 5175, 7466, 6469, 1063, 1948	135	319	19414	2.70484	1	0.75634	0.75225
GOTERM_BP_ALL	GO:0071396~cellular response to lipid	9	3.81356	0.070645	55809, 5187, 5585, 90, 4313, 5468, 6339, 1948, 8915	135	630	19414	2.05439	1	0.756634	0.752542
GOTERM_BP_ALL	GO:0031330~negative regulation of cellular catabolic process	5	2.11864	0.0715967	7077, 221937, 6469, 6093, 8925	135	226	19414	3.18158	1	0.764497	0.760362
GOTERM_BP_ALL	GO:0046651~lymphocyte proliferation	6	2.54237	0.0718871	8440, 5585, 8744, 57630, 4773, 6469	135	321	19414	2.68799	1	0.765271	0.761132
GOTERM_BP_ALL	GO:0051272~positive regulation of cellular component movement	9	3.81356	0.07218	9510, 10769, 5175, 1012, 90, 54795, 3685, 9759, 4313	135	633	19414	2.04466	1	0.766067	0.761924
GOTERM_BP_ALL	GO:0050821~protein stabilization	5	2.11864	0.0725093	7341, 7466, 10891, 23673, 55294	135	227	19414	3.16756	1	0.767245	0.763095
GOTERM_BP_ALL	GO:0038063~collagen-activated tyrosine kinase receptor signaling pathway	2	0.847458	0.0733761	1288, 1284	135	11	19414	26.1468	1	0.771623	0.76745
GOTERM_BP_ALL	GO:0043170~macromolecule metabolic process	84	35.5932	0.0737554	5187, 5585, 5664, 4773, 1063, 1062, 338699, 79258, 58476, 23043, 55841, 54795, 90, 1012, 10891, 6469, 9819, 8925, 643615, 50515, 91442, 284371, 9510, 55809, 7574, 8022, 219333, 26524, 55294, 100113393, 23613, 288, 57630, 29115, 3685, 5468, 55659, 10188, 9945, 9509, 7341, 5163, 22856, 22978, 11083, 25806, 7466, 26137, 1284, 6093, 54892, 116113, 54971, 28234, 9759, 140612, 11124, 5558, 115072896, 1…	135	10753	19414	1.12339	1	0.771623	0.76745
GOTERM_BP_ALL	GO:0043549~regulation of kinase activity	10	4.23729	0.0740741	8440, 103, 6464, 5585, 5575, 5468, 26524, 1062, 55294, 8915	135	747	19414	1.92513	1	0.771623	0.76745
GOTERM_BP_ALL	GO:0098900~regulation of action potential	3	1.27119	0.0742325	7341, 288, 54795	135	65	19414	6.63726	1	0.771623	0.76745
GOTERM_BP_ALL	GO:0048812~neuron projection morphogenesis	9	3.81356	0.0742582	23390, 288, 8022, 25806, 23043, 26115, 6469, 23026, 1948	135	637	19414	2.03182	1	0.771623	0.76745
GOTERM_BP_ALL	GO:0097191~extrinsic apoptotic signaling pathway	5	2.11864	0.0743524	57630, 90, 3685, 11124, 8915	135	229	19414	3.1399	1	0.771623	0.76745
GOTERM_BP_ALL	GO:0009059~macromolecule biosynthetic process	49	20.7627	0.0744723	5187, 5585, 4773, 1063, 338699, 58476, 55841, 90, 1012, 10891, 6469, 9819, 643615, 50515, 284371, 55809, 7574, 8022, 55294, 23613, 29115, 5468, 55659, 9945, 7341, 22856, 11083, 25806, 7466, 26137, 1284, 6093, 54892, 116113, 9759, 140612, 11124, 5558, 8440, 91661, 6464, 221937, 116931, 23390, 10208, 103, 54505, 5602, 8915	135	5770	19414	1.22124	1	0.771623	0.76745
GOTERM_BP_ALL	GO:0032943~mononuclear cell proliferation	6	2.54237	0.0749083	8440, 5585, 8744, 57630, 4773, 6469	135	325	19414	2.65491	1	0.771623	0.76745
GOTERM_BP_ALL	GO:0045859~regulation of protein kinase activity	9	3.81356	0.0753109	8440, 103, 6464, 5585, 5575, 5468, 26524, 1062, 55294	135	639	19414	2.02546	1	0.771623	0.76745
GOTERM_BP_ALL	GO:0015918~sterol transport	4	1.69492	0.0753656	6469, 23673, 5468, 23762	135	142	19414	4.05091	1	0.771623	0.76745
GOTERM_BP_ALL	GO:0022409~positive regulation of cell-cell adhesion	6	2.54237	0.0756743	288, 8440, 8744, 6469, 1948, 8915	135	326	19414	2.64676	1	0.771623	0.76745
GOTERM_BP_ALL	GO:0018105~peptidyl-serine phosphorylation	6	2.54237	0.0756743	10769, 8440, 5585, 26524, 5603, 6093	135	326	19414	2.64676	1	0.771623	0.76745
GOTERM_BP_ALL	GO:0006366~transcription from RNA polymerase II promoter	22	9.32203	0.0757785	284371, 55809, 25806, 8022, 8440, 5187, 7466, 221937, 4773, 116931, 26137, 55294, 23613, 54892, 116113, 55841, 1012, 90, 6469, 10891, 9759, 5468	135	2194	19414	1.44201	1	0.771623	0.76745
GOTERM_BP_ALL	GO:0010466~negative regulation of peptidase activity	5	2.11864	0.0762191	7077, 1800, 57630, 28234, 115072896	135	231	19414	3.11271	1	0.771636	0.767462
GOTERM_BP_ALL	GO:0043523~regulation of neuron apoptotic process	5	2.11864	0.0762191	7466, 10891, 9759, 6093, 55294	135	231	19414	3.11271	1	0.771636	0.767462
GOTERM_BP_ALL	GO:0052547~regulation of peptidase activity	7	2.9661	0.0764428	7077, 1800, 57630, 28234, 5468, 115072896, 8915	135	428	19414	2.35199	1	0.771677	0.767503
GOTERM_BP_ALL	GO:0009889~regulation of biosynthetic process	44	18.6441	0.076913	7341, 5163, 25806, 5187, 7466, 5585, 4773, 26137, 1063, 6093, 338699, 116113, 58476, 55841, 90, 1012, 6469, 10891, 9759, 140612, 11124, 5558, 9819, 643615, 284371, 55809, 8022, 7574, 8440, 91661, 6464, 221937, 116931, 55294, 23613, 103, 29115, 54505, 5468, 55659, 5602, 60481, 53836, 8915	135	5098	19414	1.24118	1	0.773631	0.769446
GOTERM_BP_ALL	GO:0009416~response to light stimulus	6	2.54237	0.0772192	5187, 4313, 5602, 1040, 5603, 55294	135	328	19414	2.63062	1	0.773631	0.769446
GOTERM_BP_ALL	GO:0008015~blood circulation	8	3.38983	0.0776372	7341, 54795, 9759, 4313, 5468, 6339, 3778, 6093	135	535	19414	2.15039	1	0.773631	0.769446
GOTERM_BP_ALL	GO:0072001~renal system development	6	2.54237	0.077998	9510, 5175, 7466, 6469, 1063, 1948	135	329	19414	2.62263	1	0.773631	0.769446
GOTERM_BP_ALL	GO:0002682~regulation of immune system process	18	7.62712	0.0781347	22978, 8440, 8744, 5585, 4773, 26137, 57590, 55294, 10769, 57724, 103, 57630, 54795, 6469, 5468, 5602, 1948, 8915	135	1703	19414	1.51998	1	0.773631	0.769446
GOTERM_BP_ALL	GO:1905953~negative regulation of lipid localization	3	1.27119	0.0782188	3685, 6469, 5468	135	67	19414	6.43914	1	0.773631	0.769446
GOTERM_BP_ALL	GO:0006357~regulation of transcription from RNA polymerase II promoter	27	11.4407	0.0787311	25806, 5187, 7466, 5585, 4773, 26137, 116113, 55841, 90, 1012, 6469, 10891, 9759, 140612, 9819, 284371, 55809, 8022, 7574, 8440, 91661, 221937, 116931, 55294, 23613, 5468, 55659	135	2844	19414	1.36526	1	0.773631	0.769446
GOTERM_BP_ALL	GO:0006935~chemotaxis	9	3.81356	0.0796123	1800, 8022, 1012, 54795, 3685, 6469, 4313, 1948, 112616	135	647	19414	2.00041	1	0.773631	0.769446
GOTERM_BP_ALL	GO:0045760~positive regulation of action potential	2	0.847458	0.0797755	288, 54795	135	12	19414	23.9679	1	0.773631	0.769446
GOTERM_BP_ALL	GO:0033673~negative regulation of kinase activity	5	2.11864	0.0800231	103, 5585, 5575, 5468, 26524	135	235	19414	3.05973	1	0.773631	0.769446
GOTERM_BP_ALL	GO:0033344~cholesterol efflux	3	1.27119	0.0802368	6469, 23673, 5468	135	68	19414	6.34444	1	0.773631	0.769446
GOTERM_BP_ALL	GO:2001258~negative regulation of cation channel activity	3	1.27119	0.0802368	7341, 288, 6236	135	68	19414	6.34444	1	0.773631	0.769446
GOTERM_BP_ALL	GO:0016925~protein sumoylation	3	1.27119	0.0802368	7341, 54795, 9759	135	68	19414	6.34444	1	0.773631	0.769446
GOTERM_BP_ALL	GO:0051196~regulation of coenzyme metabolic process	3	1.27119	0.0802368	5163, 26137, 9759	135	68	19414	6.34444	1	0.773631	0.769446
GOTERM_BP_ALL	GO:0051051~negative regulation of transport	8	3.38983	0.0806454	7341, 288, 6236, 3685, 6469, 5468, 11124, 51715	135	540	19414	2.13048	1	0.773631	0.769446
GOTERM_BP_ALL	GO:0051301~cell division	9	3.81356	0.0807103	54892, 288, 10769, 6469, 56241, 26524, 1063, 1062, 6093	135	649	19414	1.99425	1	0.773631	0.769446
GOTERM_BP_ALL	GO:0043065~positive regulation of apoptotic process	9	3.81356	0.0807103	8440, 9759, 4313, 5468, 11124, 26524, 3778, 55294, 8915	135	649	19414	1.99425	1	0.773631	0.769446
GOTERM_BP_ALL	GO:0048584~positive regulation of response to stimulus	25	10.5932	0.0808265	22856, 7466, 4773, 6093, 100505385, 338699, 57724, 23043, 54795, 90, 1012, 6469, 11124, 8440, 6464, 5575, 57590, 55294, 23390, 10769, 57630, 3685, 5468, 5603, 8915	135	2594	19414	1.38596	1	0.773631	0.769446
GOTERM_BP_ALL	GO:1901214~regulation of neuron death	6	2.54237	0.0811558	7466, 10891, 9759, 1948, 6093, 55294	135	333	19414	2.59112	1	0.773631	0.769446
GOTERM_BP_ALL	GO:0051155~positive regulation of striated muscle cell differentiation	3	1.27119	0.0822709	4773, 6469, 1948	135	69	19414	6.2525	1	0.773631	0.769446
GOTERM_BP_ALL	GO:0042330~taxis	9	3.81356	0.0823743	1800, 8022, 1012, 54795, 3685, 6469, 4313, 1948, 112616	135	652	19414	1.98507	1	0.773631	0.769446
GOTERM_BP_ALL	GO:0060537~muscle tissue development	7	2.9661	0.0825601	90, 6469, 10891, 9759, 1063, 1948, 8470	135	437	19414	2.30355	1	0.773631	0.769446
GOTERM_BP_ALL	GO:0035296~regulation of tube diameter	4	1.69492	0.0829773	54795, 4313, 3778, 6093	135	148	19414	3.88669	1	0.773631	0.769446
GOTERM_BP_ALL	GO:0050880~regulation of blood vessel size	4	1.69492	0.0829773	54795, 4313, 3778, 6093	135	148	19414	3.88669	1	0.773631	0.769446
GOTERM_BP_ALL	GO:0097746~regulation of blood vessel diameter	4	1.69492	0.0829773	54795, 4313, 3778, 6093	135	148	19414	3.88669	1	0.773631	0.769446
GOTERM_BP_ALL	GO:0048858~cell projection morphogenesis	9	3.81356	0.0834949	23390, 288, 8022, 25806, 23043, 26115, 6469, 23026, 1948	135	654	19414	1.979	1	0.773631	0.769446
GOTERM_BP_ALL	GO:0051338~regulation of transferase activity	11	4.66102	0.0835438	8440, 103, 6464, 5585, 5575, 5468, 26524, 5558, 1062, 55294, 8915	135	880	19414	1.79759	1	0.773631	0.769446
GOTERM_BP_ALL	GO:0071214~cellular response to abiotic stimulus	6	2.54237	0.0835685	9759, 4313, 6339, 5603, 55294, 8915	135	336	19414	2.56799	1	0.773631	0.769446
GOTERM_BP_ALL	GO:0009892~negative regulation of metabolic process	32	13.5593	0.0837657	7341, 25806, 5187, 7466, 5585, 4773, 26137, 1063, 6093, 116113, 55841, 28234, 54971, 6469, 9759, 115072896, 8925, 7077, 55809, 8440, 6464, 5575, 221937, 26524, 55294, 23613, 1800, 103, 57630, 3685, 5468, 53836	135	3518	19414	1.30808	1	0.773631	0.769446
GOTERM_BP_ALL	GO:0001933~negative regulation of protein phosphorylation	7	2.9661	0.0839557	8440, 5187, 103, 5585, 5575, 5468, 26524	135	439	19414	2.29306	1	0.773631	0.769446
GOTERM_BP_ALL	GO:0050671~positive regulation of lymphocyte proliferation	4	1.69492	0.0842488	8440, 8744, 4773, 6469	135	149	19414	3.8606	1	0.773631	0.769446
GOTERM_BP_ALL	GO:0035150~regulation of tube size	4	1.69492	0.0842488	54795, 4313, 3778, 6093	135	149	19414	3.8606	1	0.773631	0.769446
GOTERM_BP_ALL	GO:0030032~lamellipodium assembly	3	1.27119	0.0843209	8440, 1012, 9759	135	70	19414	6.16317	1	0.773631	0.769446
GOTERM_BP_ALL	GO:0043297~apical junction assembly	3	1.27119	0.0843209	5175, 100132463, 6093	135	70	19414	6.16317	1	0.773631	0.769446
GOTERM_BP_ALL	GO:0003013~circulatory system process	8	3.38983	0.084344	7341, 54795, 9759, 4313, 5468, 6339, 3778, 6093	135	546	19414	2.10707	1	0.773631	0.769446
GOTERM_BP_ALL	GO:0009057~macromolecule catabolic process	15	6.35593	0.0853775	7077, 7341, 7466, 219333, 25897, 6093, 55294, 10769, 255488, 58476, 57630, 54971, 6469, 4313, 11124	135	1357	19414	1.58962	1	0.781071	0.776847
GOTERM_BP_ALL	GO:0044249~cellular biosynthetic process	56	23.7288	0.0858939	5187, 5585, 4773, 1063, 338699, 58476, 55841, 90, 1012, 10891, 6469, 9819, 643615, 50515, 284371, 55809, 7574, 8022, 55294, 23613, 29115, 5468, 55659, 9945, 60481, 53836, 7341, 5163, 22856, 11083, 25806, 7466, 26137, 1284, 1040, 6093, 54892, 116113, 9759, 140612, 11124, 5558, 57605, 8440, 91661, 6464, 221937, 116931, 23390, 10208, 103, 27430, 54505, 5602, 54947, 8915	135	6801	19414	1.18412	1	0.781809	0.777581
GOTERM_BP_ALL	GO:1901988~negative regulation of cell cycle phase transition	5	2.11864	0.0859033	10769, 90, 56241, 23026, 1063	135	241	19414	2.98356	1	0.781809	0.777581
GOTERM_BP_ALL	GO:0043068~positive regulation of programmed cell death	9	3.81356	0.086336	8440, 9759, 4313, 5468, 11124, 26524, 3778, 55294, 8915	135	659	19414	1.96399	1	0.783717	0.779478
GOTERM_BP_ALL	GO:0001678~cellular glucose homeostasis	4	1.69492	0.0869021	221937, 54795, 26137, 10891	135	151	19414	3.80947	1	0.786823	0.782567
GOTERM_BP_ALL	GO:0044248~cellular catabolic process	22	9.32203	0.0877097	7077, 7341, 22978, 7466, 219333, 221937, 26137, 23673, 25897, 6093, 55294, 1800, 10769, 57724, 255488, 58476, 57630, 28234, 6469, 11124, 51715, 8925	135	2234	19414	1.41619	1	0.792093	0.787809
GOTERM_BP_ALL	GO:0032946~positive regulation of mononuclear cell proliferation	4	1.69492	0.0881998	8440, 8744, 4773, 6469	135	152	19414	3.78441	1	0.79264	0.788353
GOTERM_BP_ALL	GO:0009410~response to xenobiotic stimulus	7	2.9661	0.0882215	1800, 4773, 28234, 9759, 4313, 5468, 1063	135	445	19414	2.26214	1	0.79264	0.788353
GOTERM_BP_ALL	GO:0045600~positive regulation of fat cell differentiation	3	1.27119	0.0884671	54795, 5468, 1040	135	72	19414	5.99198	1	0.792819	0.788531
GOTERM_BP_ALL	GO:0010605~negative regulation of macromolecule metabolic process	30	12.7119	0.0898915	7341, 25806, 5187, 7466, 5585, 4773, 26137, 1063, 6093, 116113, 55841, 28234, 54971, 6469, 9759, 115072896, 7077, 55809, 8440, 6464, 5575, 221937, 26524, 55294, 23613, 1800, 103, 57630, 3685, 5468	135	3278	19414	1.31611	1	0.803534	0.799188
GOTERM_BP_ALL	GO:0014823~response to activity	3	1.27119	0.0905627	10891, 4313, 1284	135	73	19414	5.90989	1	0.805435	0.801079
GOTERM_BP_ALL	GO:0051145~smooth muscle cell differentiation	3	1.27119	0.0905627	4773, 90, 6469	135	73	19414	5.90989	1	0.805435	0.801079
GOTERM_BP_ALL	GO:0046649~lymphocyte activation	11	4.66102	0.0909522	8440, 1015, 5585, 8744, 57630, 4773, 6469, 9759, 1948, 112616, 8915	135	895	19414	1.76747	1	0.806857	0.802493
GOTERM_BP_ALL	GO:0030198~extracellular matrix organization	6	2.54237	0.0918834	9510, 1288, 3685, 4313, 1284, 9509	135	346	19414	2.49377	1	0.811866	0.807475
GOTERM_BP_ALL	GO:1902260~negative regulation of delayed rectifier potassium channel activity	2	0.847458	0.092443	7341, 288	135	14	19414	20.5439	1	0.811866	0.807475
GOTERM_BP_ALL	GO:0010745~negative regulation of macrophage derived foam cell differentiation	2	0.847458	0.092443	3685, 5468	135	14	19414	20.5439	1	0.811866	0.807475
GOTERM_BP_ALL	GO:0044057~regulation of system process	8	3.38983	0.0926885	7341, 5575, 54795, 9759, 4313, 5468, 3778, 6093	135	559	19414	2.05807	1	0.811866	0.807475
GOTERM_BP_ALL	GO:0043062~extracellular structure organization	6	2.54237	0.0927377	9510, 1288, 3685, 4313, 1284, 9509	135	347	19414	2.48658	1	0.811866	0.807475
GOTERM_BP_ALL	GO:0009888~tissue development	21	8.89831	0.0929036	22856, 25806, 8022, 5175, 1284, 26524, 1063, 6093, 8470, 54795, 90, 388697, 3685, 6469, 10891, 9759, 4313, 5468, 1948, 8915, 50515	135	2123	19414	1.42249	1	0.811866	0.807475
GOTERM_BP_ALL	GO:0048699~generation of neurons	17	7.20339	0.09317	25806, 8022, 8440, 26115, 23026, 6093, 23390, 288, 57630, 23043, 8835, 6469, 4313, 5468, 1948, 89796, 8925	135	1622	19414	1.50723	1	0.812174	0.807781
GOTERM_BP_ALL	GO:0050793~regulation of developmental process	27	11.4407	0.0944652	5585, 4773, 26115, 161176, 9260, 1284, 1063, 1040, 6093, 23043, 55841, 54795, 90, 6469, 10891, 9759, 9510, 6464, 8744, 26524, 55294, 10769, 57630, 8835, 3685, 5468, 1948	135	2901	19414	1.33844	1	0.821427	0.816984
GOTERM_BP_ALL	GO:0032990~cell part morphogenesis	9	3.81356	0.095198	23390, 288, 8022, 25806, 23043, 26115, 6469, 23026, 1948	135	674	19414	1.92028	1	0.824822	0.820361
GOTERM_BP_ALL	GO:0018209~peptidyl-serine modification	6	2.54237	0.0953253	10769, 8440, 5585, 26524, 5603, 6093	135	350	19414	2.46527	1	0.824822	0.820361
GOTERM_BP_ALL	GO:0048534~hematopoietic or lymphoid organ development	12	5.08475	0.0968491	54892, 103, 1015, 5585, 8744, 57630, 9644, 6469, 9759, 5468, 112616, 55294	135	1024	19414	1.68524	1	0.835948	0.831427
GOTERM_BP_ALL	GO:0022607~cellular component assembly	30	12.7119	0.0976202	7341, 347240, 1063, 1183, 1062, 6093, 23523, 100132463, 1015, 58476, 23043, 54795, 1012, 10891, 9759, 11124, 643615, 5175, 8440, 1010, 23673, 401541, 2060, 10769, 288, 103, 54505, 1948, 51715, 8915	135	3306	19414	1.30497	1	0.840539	0.835993
GOTERM_BP_ALL	GO:0032879~regulation of localization	28	11.8644	0.0980244	7341, 5187, 7466, 5585, 6236, 6093, 58476, 54795, 90, 1012, 6469, 10891, 9759, 11124, 3778, 9510, 5175, 26524, 55294, 23613, 1800, 10769, 288, 3685, 4313, 5468, 10188, 51715	135	3044	19414	1.3228	1	0.841956	0.837402
GOTERM_BP_ALL	GO:1905203~regulation of connective tissue replacement	2	0.847458	0.0987117	5468, 6093	135	15	19414	19.1743	1	0.842849	0.838291
GOTERM_BP_ALL	GO:0070932~histone H3 deacetylation	2	0.847458	0.0987117	5187, 9759	135	15	19414	19.1743	1	0.842849	0.838291
GOTERM_BP_ALL	GO:1901863~positive regulation of muscle tissue development	3	1.27119	0.0990882	6469, 10891, 1948	135	77	19414	5.60289	1	0.842849	0.838291
GOTERM_BP_ALL	GO:0051193~regulation of cofactor metabolic process	3	1.27119	0.0990882	5163, 26137, 9759	135	77	19414	5.60289	1	0.842849	0.838291

## Sheet: CC1
Category	Term	Count	%	PValue	Genes	List Total	Pop Hits	Pop Total	Fold Enrichment	Bonferroni	Benjamini	FDR
GOTERM_CC_1	GO:0030054~cell junction	19	8.05085	0.000234262	5175, 6464, 8675, 9644, 9260, 1010, 100505385, 57590, 8470, 1800, 288, 100132463, 1015, 1012, 3685, 10188, 1948, 51715, 3801	143	1022	20624	2.68126	0.00327468	0.00327967	0.00140557
GOTERM_CC_1	GO:0043226~organelle	117	49.5763	0.0242728	5664, 161176, 1063, 1062, 1183, 338699, 23043, 6469, 10099, 10891, 8925, 9510, 8022, 7574, 6002, 57590, 55294, 100113393, 23613, 57630, 83861, 283358, 60481, 3801, 7341, 5163, 22856, 7466, 8675, 9644, 26137, 23026, 6093, 54892, 26010, 116113, 79710, 9759, 115072896, 5558, 7077, 5175, 8440, 91661, 5575, 23673, 401541, 2060, 1800, 23390, 10769, 5602, 5603, 51715, 54947, 64062, 5187, 347240, 5585, 4…	143	15326	20624	1.10102	0.291079	0.0848435	0.0363615
GOTERM_CC_1	GO:0044422~organelle part	91	38.5593	0.0287803	5187, 5585, 347240, 5664, 4773, 161176, 9260, 23762, 1063, 1183, 1062, 1260, 23523, 1015, 58476, 23043, 54795, 10891, 6469, 50515, 91442, 55809, 8022, 6002, 219333, 26524, 55890, 57590, 55294, 100113393, 23613, 288, 29115, 283358, 388697, 3685, 5468, 9823, 1948, 10188, 60481, 3801, 7341, 5163, 22856, 11083, 25806, 7466, 8675, 9644, 26137, 1284, 23026, 1040, 6093, 8470, 54892, 26010, 116113, 79710…	143	11379	20624	1.15338	0.335577	0.0848435	0.0363615
GOTERM_CC_1	GO:0044456~synapse part	14	5.9322	0.0297156	8440, 7466, 8675, 5575, 5664, 26115, 23673, 25897, 1183, 23390, 288, 23043, 1948, 3778	143	1052	20624	1.91933	0.344479	0.0848435	0.0363615
GOTERM_CC_1	GO:0045202~synapse	18	7.62712	0.0303013	8440, 7466, 6002, 8675, 5575, 5664, 26115, 23673, 25897, 1183, 6093, 8470, 23390, 288, 23043, 9759, 1948, 3778	143	1508	20624	1.7215	0.349997	0.0848435	0.0363615
GOTERM_CC_1	GO:0032991~macromolecular complex	56	23.7288	0.0623866	5585, 347240, 64599, 5664, 4773, 161176, 9260, 1063, 1062, 1260, 1015, 54795, 90, 1012, 91442, 55809, 8022, 55890, 55294, 3685, 5468, 10188, 3801, 7341, 5163, 8675, 9644, 1284, 23026, 6093, 54892, 26010, 54212, 9759, 11124, 5558, 3778, 1438, 5175, 6464, 5575, 116931, 1010, 23673, 25897, 2060, 10769, 255488, 103, 1288, 27430, 8835, 5522, 54505, 6339, 8915	143	6667	20624	1.21142	0.59418	0.121453	0.0623866
GOTERM_CC_1	GO:0099080~supramolecular complex	13	5.50847	0.0625326	347240, 5664, 9260, 1284, 1062, 8470, 288, 1288, 9759, 4313, 89796, 3801, 8915	143	1061	20624	1.76712	0.595064	0.121453	0.0625326
GOTERM_CC_1	GO:0044464~cell part	137	58.0508	0.078077	6236, 5664, 161176, 1063, 1062, 1183, 338699, 83998, 79258, 23043, 55841, 90, 6469, 10099, 10891, 8925, 9510, 8022, 7574, 6002, 57590, 55294, 100113393, 23613, 57630, 83861, 283358, 60481, 3801, 53836, 7341, 5163, 22856, 22978, 7466, 8675, 9644, 26137, 23026, 6093, 54892, 26010, 116113, 79710, 9759, 115072896, 5558, 3778, 7077, 5175, 8440, 91661, 5575, 23673, 1010, 401541, 2060, 1800, 23390, 1076…	143	19055	20624	1.03693	0.679576	0.121453	0.078077
GOTERM_CC_1	GO:0005623~cell	137	58.0508	0.078077	6236, 5664, 161176, 1063, 1062, 1183, 338699, 83998, 79258, 23043, 55841, 90, 6469, 10099, 10891, 8925, 9510, 8022, 7574, 6002, 57590, 55294, 100113393, 23613, 57630, 83861, 283358, 60481, 3801, 53836, 7341, 5163, 22856, 22978, 7466, 8675, 9644, 26137, 23026, 6093, 54892, 26010, 116113, 79710, 9759, 115072896, 5558, 3778, 7077, 5175, 8440, 91661, 5575, 23673, 1010, 401541, 2060, 1800, 23390, 1076…	143	19055	20624	1.03693	0.679576	0.121453	0.078077

## Sheet: KEGG
Category	Term	Count	%	PValue	Genes	List Total	Pop Hits	Pop Total	Fold Enrichment	Bonferroni	Benjamini	FDR
KEGG_PATHWAY	hsa05418:Fluid shear stress and atherosclerosis	7	2.9661	0.000973899	7341, 5175, 90, 3685, 4313, 5602, 5603	71	139	8465	6.00415	0.163317	0.178224	0.17725
KEGG_PATHWAY	hsa04926:Relaxin signaling pathway	6	2.54237	0.0041716	6464, 1288, 4313, 1284, 5602, 5603	71	129	8465	5.54537	0.534666	0.381702	0.379616
KEGG_PATHWAY	hsa04933:AGE-RAGE signaling pathway in diabetic complications	5	2.11864	0.00926784	1288, 4313, 1284, 5602, 5603	71	100	8465	5.96127	0.818032	0.485124	0.482473
KEGG_PATHWAY	hsa04660:T cell receptor signaling pathway	5	2.11864	0.0106038	8440, 4773, 5602, 5603, 8915	71	104	8465	5.73199	0.857848	0.485124	0.482473
KEGG_PATHWAY	hsa04670:Leukocyte transendothelial migration	5	2.11864	0.0144725	5175, 100132463, 4313, 5603, 6093	71	114	8465	5.22918	0.930597	0.493289	0.490593
KEGG_PATHWAY	hsa04917:Prolactin signaling pathway	4	1.69492	0.0199783	6464, 8835, 5602, 5603	71	70	8465	6.81288	0.975104	0.493289	0.490593
KEGG_PATHWAY	hsa04510:Focal adhesion	6	2.54237	0.0259776	6464, 1288, 3685, 1284, 5602, 6093	71	203	8465	3.5239	0.991907	0.493289	0.490593
KEGG_PATHWAY	hsa05135:Yersinia infection	5	2.11864	0.0264638	5585, 4773, 5602, 5603, 6093	71	137	8465	4.35129	0.992614	0.493289	0.490593
KEGG_PATHWAY	hsa04910:Insulin signaling pathway	5	2.11864	0.0264638	6464, 5575, 8835, 10891, 5602	71	137	8465	4.35129	0.992614	0.493289	0.490593
KEGG_PATHWAY	hsa05205:Proteoglycans in cancer	6	2.54237	0.0269557	288, 3685, 6469, 4313, 5603, 6093	71	205	8465	3.48952	0.993266	0.493289	0.490593
KEGG_PATHWAY	hsa01522:Endocrine resistance	4	1.69492	0.0471941	6464, 4313, 5602, 5603	71	98	8465	4.86634	0.999856	0.785139	0.780848
KEGG_PATHWAY	hsa04625:C-type lectin receptor signaling pathway	4	1.69492	0.0545862	4773, 5602, 5603, 8915	71	104	8465	4.58559	0.999965	0.810951	0.806519
KEGG_PATHWAY	hsa04360:Axon guidance	5	2.11864	0.0634348	8440, 4773, 6469, 1948, 6093	71	182	8465	3.27542	0.999994	0.810951	0.806519
KEGG_PATHWAY	hsa05200:Pathways in cancer	9	3.81356	0.0705207	1288, 3685, 6469, 4313, 5468, 1284, 5602, 6093, 1438	71	531	8465	2.02077	0.999998	0.810951	0.806519
KEGG_PATHWAY	hsa04722:Neurotrophin signaling pathway	4	1.69492	0.0753121	6464, 5664, 5602, 5603	71	119	8465	4.00757	0.999999	0.810951	0.806519
KEGG_PATHWAY	hsa04935:Growth hormone synthesis, secretion and action	4	1.69492	0.0768028	6464, 8835, 5602, 5603	71	120	8465	3.97418	1	0.810951	0.806519
KEGG_PATHWAY	hsa04071:Sphingolipid signaling pathway	4	1.69492	0.0783067	5522, 5602, 5603, 6093	71	121	8465	3.94133	1	0.810951	0.806519
KEGG_PATHWAY	hsa05130:Pathogenic Escherichia coli infection	5	2.11864	0.0797657	8440, 100132463, 5602, 5603, 6093	71	197	8465	3.02602	1	0.810951	0.806519
KEGG_PATHWAY	hsa04380:Osteoclast differentiation	4	1.69492	0.0891917	4773, 5468, 5602, 5603	71	128	8465	3.72579	1	0.859057	0.854363

## Sheet: TSGs
ID	Gene Name	Species	Distance to TSS	Overlap_Center
8915	BCL10 immune signaling adaptor(BCL10)	Homo sapiens	-21215
54971	BTG3 associated nuclear protein(BANP)	Homo sapiens	28916	Intron 4
50514	deleted in esophageal cancer 1(DELEC1)	Homo sapiens	81293
26524	large tumor suppressor kinase 2(LATS2)	Homo sapiens	-8105
10769	polo like kinase 2(PLK2)	Homo sapiens	52807
56241	sushi domain containing 2(SUSD2)	Homo sapiens	-7163
23390	zinc finger DHHC-type palmitoyltransferase 17(ZDHHC17)	Homo sapiens	24080	Intron 1
23613	zinc finger MYND-type containing 8(ZMYND8)	Homo sapiens		Intron 3

## Sheet: Bound cell adhesion genes
ID	Gene Name	Species	Distance to TSS	Overlap_Center
BCL10 immune signaling adaptor(BCL10)	BCL10 immune signaling adaptor(BCL10)	Homo sapiens	-21215
NCK adaptor protein 2(NCK2)	NCK adaptor protein 2(NCK2)	Homo sapiens	-32898
Rho associated coiled-coil containing protein kinase 1(ROCK1)	Rho associated coiled-coil containing protein kinase 1(ROCK1)	Homo sapiens	387119
SH3 domain containing ring finger 1(SH3RF1)	SH3 domain containing ring finger 1(SH3RF1)	Homo sapiens	22161	Intron 2
SHC adaptor protein 1(SHC1)	SHC adaptor protein 1(SHC1)	Homo sapiens	-1198
TNF superfamily member 9(TNFSF9)	TNF superfamily member 9(TNFSF9)	Homo sapiens	-5246
activin A receptor type 1(ACVR1)	activin A receptor type 1(ACVR1)	Homo sapiens	15366	Intron 1
ankyrin 3(ANK3)	ankyrin 3(ANK3)	Homo sapiens		Intron 23
cadherin 12(CDH12)	cadherin 12(CDH12)	Homo sapiens		Intron 1
cadherin 13(CDH13)	cadherin 13(CDH13)	Homo sapiens	29480	Intron 1
cadherin 17(CDH17)	cadherin 17(CDH17)	Homo sapiens	-4252
claudin 24(CLDN24)	claudin 24(CLDN24)	Homo sapiens	-13706
collagen type IV alpha 6 chain(COL4A6)	collagen type IV alpha 6 chain(COL4A6)	Homo sapiens		Intron 2
ephrin B2(EFNB2)	ephrin B2(EFNB2)	Homo sapiens	2509	Intron 2
integrin subunit alpha V(ITGAV)	integrin subunit alpha V(ITGAV)	Homo sapiens	-46277
kinesin family member C3(KIFC3)	kinesin family member C3(KIFC3)	Homo sapiens		Intron 11
matrix metallopeptidase 2(MMP2)	matrix metallopeptidase 2(MMP2)	Homo sapiens	295	5'UTR
platelet and endothelial cell adhesion molecule 1(PECAM1)	platelet and endothelial cell adhesion molecule 1(PECAM1)	Homo sapiens		Intron 2
sonic hedgehog signaling molecule(SHH)	sonic hedgehog signaling molecule(SHH)	Homo sapiens	15026
